# Supplementary material for: Base-promoted cascade β-F-elimination/electrocyclization/Diels–Alder/retro-Diels–Alder reaction: efficient access to δ-carboline derivatives
Source: Royal Society of Chemistry journal article supplement (doi:10.1039/d2sc03166c), 2022-01-01
Supplement: d2sc03166c1.pdf [file d2sc03166c1.pdf]

*Supporting Information for*

## **Base-Promoted Cascade $\beta$ -F-Elimination/Electrocyclization/Diels-Alder/Retro-Diels-Alder Reaction: Efficient Access to $\delta$ -Carboline Derivatives**

Xi-Shang Sun,<sup>‡a</sup> Xin-Yu Diao,<sup>‡a</sup> Xiu-Qin Dong,<sup>\*a</sup> and Chun-Jiang Wang<sup>\*a,b</sup>

<sup>[a]</sup> College of Chemistry and Molecular Sciences, Engineering Research Center of Organosilicon Compounds & Materials, Ministry of Education, Wuhan University, Wuhan, 430072, China

<sup>[b]</sup> State Key Laboratory of Elemento-organic Chemistry, Nankai University, Tianjin, 300071, China

<sup>‡</sup> These authors contributed equally to this work

E-mail: cjwang@whu.edu.cn; xiuqindong@whu.edu.cn

### **Table of Contents**

|    |                                                                                                                     |     |
|----|---------------------------------------------------------------------------------------------------------------------|-----|
| 1. | General remarks.....                                                                                                | S2  |
| 2. | General procedure for synthesis of isatin-activated ketoimine ester <b>1</b> .....                                  | S2  |
| 3. | General procedure for cascade $\beta$ -F elimination/electrocyclization/Diels-Alder/retro-Diels-Alder reaction..... | S8  |
| 4. | General procedure for synthesis of intermediate <b>III</b> .....                                                    | S24 |
| 5. | Synthetic application.....                                                                                          | S25 |
| 6. | Photophysical data.....                                                                                             | S28 |
| 7. | X-ray Structure of <b>4a</b> and <b>III</b> .....                                                                   | S29 |
| 8. | Reference.....                                                                                                      | S31 |
| 9. | NMR and HPLC spectra.....                                                                                           | S32 |



**<sup>1</sup>H NMR** (400 MHz, Chloroform-d)  $\delta$  7.80 – 7.75 (m, 1H), 7.52 – 7.44 (m, 1H), 7.17 – 7.09 (m, 1H), 6.84 (d,  $J$  = 7.8 Hz, 1H), 6.22 (q,  $J$  = 8.0 Hz, 1H), 4.38 – 4.22 (m, 2H), 3.20 (s, 3H), 1.32 (t,  $J$  = 7.1 Hz, 3H).

**<sup>13</sup>C NMR** (101 MHz, Chloroform-d)  $\delta$  163.8 (d,  $J$  = 2.3 Hz), 158.5, 158.1, 146.7, 134.4, 123.7, 123.6, 123.3 (q,  $J$  = 280.3 Hz), 120.5, 108.9, 64.5 (q,  $J$  = 29.9 Hz), 62.6, 25.9, 14.0.

**<sup>19</sup>F NMR** (376 MHz, Chloroform-d)  $\delta$  -71.85 (d,  $J$  = 8.0 Hz).

**HRMS** (ESI+) Calcd. For C<sub>14</sub>H<sub>14</sub>F<sub>3</sub>N<sub>2</sub>O<sub>3</sub><sup>+</sup> ([M+H]<sup>+</sup>): 315.0951, found: 315.0945.

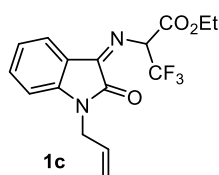

**Ethyl (Z)-2-((1-allyl-2-oxoindolin-3-ylidene)amino)-3,3,3-trifluoropropanoate:** Yellow solid; 93% yield.

**<sup>1</sup>H NMR** (400 MHz, Chloroform-d)  $\delta$  7.82 – 7.75 (m, 1H), 7.50 – 7.36 (m, 1H), 7.17 – 7.08 (m, 1H), 6.84 (d,  $J$  = 7.9 Hz, 1H), 6.21 (q,  $J$  = 8.0 Hz, 1H), 5.90 – 5.75 (m, 1H), 5.31 – 5.23 (m, 2H), 4.39 – 4.24 (m, 4H), 1.31 (t,  $J$  = 7.1 Hz, 3H).

**<sup>13</sup>C NMR** (101 MHz, Chloroform-d)  $\delta$  163.7 (d,  $J$  = 2.3 Hz), 158.2, 158.0, 146.0, 134.3, 130.5, 123.8, 123.6, 123.4 (q,  $J$  = 280.2 Hz), 120.6, 118.4, 109.8, 64.6 (q,  $J$  = 29.6 Hz), 62.6, 42.2, 14.0.

**<sup>19</sup>F NMR** (376 MHz, Chloroform-d)  $\delta$  -71.85 (d,  $J$  = 8.0 Hz).

**HRMS** (ESI+) Calcd. For C<sub>16</sub>H<sub>16</sub>F<sub>3</sub>N<sub>2</sub>O<sub>3</sub><sup>+</sup> ([M+H]<sup>+</sup>): 341.1108, found: 341.1103.

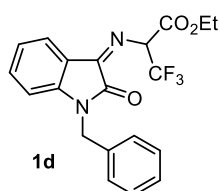

**Ethyl (Z)-2-((1-benzyl-2-oxoindolin-3-ylidene)amino)-3,3,3-trifluoropropanoate:** Yellow solid; 91% yield.

**<sup>1</sup>H NMR** (400 MHz, Chloroform-d)  $\delta$  7.82 – 7.75 (m, 1H), 7.39 – 7.26 (m, 6H), 7.13 – 7.06 (m, 1H), 6.73 (d,  $J$  = 7.9 Hz, 1H), 6.26 (q,  $J$  = 8.0 Hz, 1H), 4.88 (q,  $J$  = 15.7 Hz, 2H), 4.43 – 4.21 (m, 2H), 1.31 (t,  $J$  = 7.1 Hz, 3H).

$^{13}\text{C}$  NMR (101 MHz, Chloroform-d)  $\delta$  163.7 (d,  $J = 2.3$  Hz), 158.6, 158.0, 145.9, 134.8, 134.3, 129.0, 128.1, 123.8, 123.6, 123.4 (q,  $J = 280.2$  Hz), 120.7, 109.9, 64.7 (q,  $J = 29.9$  Hz), 62.7, 43.7, 14.0.

$^{19}\text{F}$  NMR (376 MHz, Chloroform-d)  $\delta$  -71.80 (d,  $J = 8.0$  Hz).

HRMS (ESI+) Calcd. For  $\text{C}_{20}\text{H}_{18}\text{F}_3\text{N}_2\text{O}_3^+$  ( $[\text{M}+\text{H}]^+$ ): 391.1264, found: 391.1262.

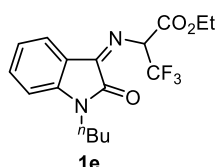

**Ethyl (Z)-2-((1-butyl-2-oxoindolin-3-ylidene)amino)-3,3,3-trifluoropropanoate:** Yellow solid; 98% yield.

$^1\text{H}$  NMR (400 MHz, Chloroform-d)  $\delta$  7.81 – 7.73 (m, 1H), 7.50 – 7.41 (m, 1H), 7.15 – 7.07 (m, 1H), 6.85 (d,  $J = 7.9$  Hz, 1H), 6.22 (q,  $J = 8.0$  Hz, 1H), 4.38 – 4.19 (m, 2H), 3.75 – 3.59 (m, 2H), 1.70 – 1.60 (m, 2H), 1.44 – 1.35 (m, 2H), 1.30 (t,  $J = 7.2$  Hz, 3H), 0.96 (t,  $J = 7.3$  Hz, 3H).

$^{13}\text{C}$  NMR (101 MHz, Chloroform-d)  $\delta$  163.8 (d,  $J = 2.3$  Hz), 158.5, 158.3, 146.2, 134.3, 123.8, 123.4 (q,  $J = 280.3$  Hz), 123.4, 120.7, 109.2, 64.5 (q,  $J = 29.8$  Hz), 62.6, 39.7, 29.4, 20.2, 14.0, 13.7.

$^{19}\text{F}$  NMR (376 MHz, Chloroform-d)  $\delta$  -71.89 (d,  $J = 8.0$  Hz).

HRMS (ESI+) Calcd. For  $\text{C}_{17}\text{H}_{20}\text{F}_3\text{N}_2\text{O}_3^+$  ( $[\text{M}+\text{H}]^+$ ): 357.1421, found: 357.1418.

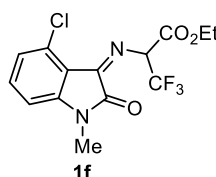

**Ethyl (Z)-2-((4-chloro-1-methyl-2-oxoindolin-3-ylidene)amino)-3,3,3-trifluoropropanoate:** Yellow solid; 76% yield.

$^1\text{H}$  NMR (400 MHz, Chloroform-d)  $\delta$  7.41 – 7.33 (m, 1H), 7.14 – 7.06 (m, 1H), 6.77 – 6.71 (m, 1H), 6.13 (q,  $J = 8.0$  Hz, 1H), 4.39 – 4.23 (m, 2H), 3.20 (s, 3H), 1.32 (t,  $J = 7.1$  Hz, 3H).

$^{13}\text{C}$  NMR (101 MHz, Chloroform-d)  $\delta$  163.5 (d,  $J = 2.4$  Hz), 157.6, 156.4, 148.0, 134.3, 132.6, 125.7, 123.4 (q,  $J = 280.4$  Hz), 116.9, 107.2, 65.1 (q,  $J = 30.1$  Hz), 62.6, 26.1, 14.0.

$^{19}\text{F}$  NMR (376 MHz, Chloroform-d)  $\delta$  -72.03 (d,  $J = 8.0$  Hz).

**HRMS** (ESI+) Calcd. For  $C_{14}H_{13}ClF_3N_2O_3^+$  ( $[M+H]^+$ ): 349.0561, found: 349.0551.

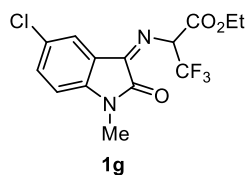

**Ethyl (Z)-2-((5-chloro-1-methyl-2-oxoindolin-3-ylidene)amino)-3,3,3-trifluoropropanoate:**

Yellow solid; 88% yield.

**$^1H$  NMR** (400 MHz, Chloroform-d)  $\delta$  7.76 (d,  $J = 2.1$  Hz, 1H), 7.48 – 7.40 (m, 1H), 6.79 (d,  $J = 8.3$  Hz, 1H), 6.18 (q,  $J = 8.0$  Hz, 1H), 4.35 – 4.24 (m, 3H), 3.20 (s, 3H), 1.32 (t,  $J = 7.1$  Hz, 4H).

**$^{13}C$  NMR** (101 MHz, Chloroform-d)  $\delta$  163.4 (d,  $J = 2.4$  Hz), 158.1, 157.3, 145.0, 133.9, 129.4, 123.9, 123.2 (q,  $J = 280.3$  Hz), 121.7, 110.0, 64.7 (q,  $J = 30.2$  Hz), 62.8, 26.1, 14.0.

**$^{19}F$  NMR** (376 MHz, Chloroform-d)  $\delta$  -71.80 (d,  $J = 8.0$  Hz).

**HRMS** (ESI+) Calcd. For  $C_{14}H_{13}ClF_3N_2O_3^+$  ( $[M+H]^+$ ): 349.0561, found: 349.0555.

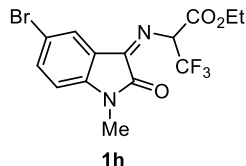

**Ethyl (Z)-2-((5-bromo-1-methyl-2-oxoindolin-3-ylidene)amino)-3,3,3-trifluoropropanoate:** Yellow solid; 68% yield.

**$^1H$  NMR** (400 MHz, Chloroform-d)  $\delta$  7.90 (d,  $J = 2.0$  Hz, 1H), 7.64 – 7.54 (m, 1H), 6.74 (d,  $J = 8.3$  Hz, 1H), 6.17 (q,  $J = 7.9$  Hz, 1H), 4.36 – 4.25 (m, 2H), 3.19 (s, 3H), 1.32 (t,  $J = 7.1$  Hz, 3H).

**$^{13}C$  NMR** (101 MHz, Chloroform-d)  $\delta$  163.5 (d,  $J = 2.4$  Hz), 157.9, 157.1, 145.5, 136.8, 126.7, 123.2 (q,  $J = 280.3$  Hz), 122.0, 116.5, 110.5, 64.7 (q,  $J = 29.9$  Hz), 62.8, 26.0, 14.0.

**$^{19}F$  NMR** (376 MHz, Chloroform-d)  $\delta$  -71.79 (d,  $J = 8.0$  Hz).

**HRMS** (ESI+) Calcd. For  $C_{14}H_{13}BrF_3N_2O_3^+$  ( $[M+H]^+$ ): 393.0056, found: 393.0046.

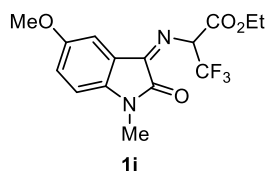

**Ethyl (Z)-3,3,3-trifluoro-2-((5-methoxy-1-methyl-2-oxoindolin-3-ylidene)amino)propanoate:** Yellow solid; 77% yield.

**<sup>1</sup>H NMR** (400 MHz, Chloroform-d)  $\delta$  7.34 (d,  $J = 2.7$  Hz, 1H), 7.07 – 7.00 (m, 1H), 6.75 (d,  $J = 8.6$  Hz, 1H), 6.25 (q,  $J = 8.0$  Hz, 1H), 4.37 – 4.23 (m, 2H), 3.83 (s, 3H), 3.17 (s, 3H), 1.32 (t,  $J = 7.1$  Hz, 3H).

**<sup>13</sup>C NMR** (101 MHz, Chloroform-d)  $\delta$  163.8 (d,  $J = 2.5$  Hz), 158.6, 156.6, 140.5, 123.3 (q,  $J = 280.3$  Hz), 120.9, 109.8, 108.4, 64.4 (q,  $J = 29.8$  Hz), 62.6, 56.0, 25.9, 14.0.

**<sup>19</sup>F NMR** (376 MHz, Chloroform-d)  $\delta$  -71.80 (d,  $J = 7.9$  Hz).

**HRMS** (ESI+) Calcd. For  $C_{15}H_{16}F_3N_2O_4^+$  ( $[M+H]^+$ ): 345.1057, found: 345.1053.

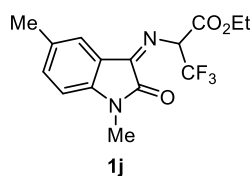

**Ethyl (Z)-2-((1,5-dimethyl-2-oxoindolin-3-ylidene)amino)-3,3,3-trifluoropropanoate:** Yellow solid; 87% yield.

**<sup>1</sup>H NMR** (400 MHz, Chloroform-d)  $\delta$  7.63 – 7.58 (m, 1H), 7.26 (s, 1H), 6.72 (d,  $J = 7.9$  Hz, 1H), 6.23 (q,  $J = 8.0$  Hz, 1H), 4.38 – 4.21 (m, 2H), 3.18 (s, 3H), 2.34 (s, 3H), 1.31 (t,  $J = 7.2$  Hz, 3H).

**<sup>13</sup>C NMR** (101 MHz, Chloroform-d)  $\delta$  163.8 (d,  $J = 2.3$  Hz), 158.6, 158.4, 144.5, 134.7, 133.4, 124.2, 123.4 (q,  $J = 280.3$  Hz), 120.4, 108.7, 64.4 (q,  $J = 29.8$  Hz), 62.6, 25.9, 20.8, 14.0.

**<sup>19</sup>F NMR** (376 MHz, Chloroform-d)  $\delta$  -71.87 (d,  $J = 8.0$  Hz).

**HRMS** (ESI+) Calcd. For  $C_{15}H_{16}F_3N_2O_3^+$  ( $[M+H]^+$ ): 329.1108, found: 329.1109.

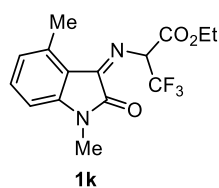

**Ethyl (Z)-2-((1,4-dimethyl-2-oxoindolin-3-ylidene)amino)-3,3,3-trifluoropropanoate:**

Yellow solid; 80% yield.

**<sup>1</sup>H NMR** (400 MHz, Chloroform-d)  $\delta$  7.36 – 7.29 (m, 1H), 6.92 (d,  $J = 7.8$  Hz, 1H), 6.66 (d,  $J = 7.8$  Hz, 1H), 6.14 (q,  $J = 8.0$  Hz, 1H), 4.42 – 4.18 (m, 2H), 3.18 (s, 3H), 2.60 (s, 3H), 1.32 (t,  $J = 7.1$  Hz, 3H).

**<sup>13</sup>C NMR** (101 MHz, Chloroform-d)  $\delta$  164.0 (d,  $J = 2.5$  Hz), 159.0, 158.4, 146.9, 139.6, 133.3, 126.3, 123.5 (q,  $J = 280.2$  Hz), 117.8, 106.3, 64.8 (q,  $J = 29.9$  Hz), 62.5, 25.8, 19.0, 14.0.

**<sup>19</sup>F NMR** (376 MHz, Chloroform-d)  $\delta$  -72.29 (d,  $J = 8.0$  Hz).

**HRMS** (ESI+) Calcd. For C<sub>15</sub>H<sub>16</sub>F<sub>3</sub>N<sub>2</sub>O<sub>3</sub><sup>+</sup> ([M+H]<sup>+</sup>): 329.1108, found: 329.1100.

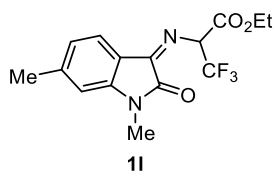

**Ethyl (Z)-2-((1,6-dimethyl-2-oxoindolin-3-ylidene)amino)-3,3,3-trifluoropropanoate:**

Yellow solid; 86% yield.

**<sup>1</sup>H NMR** (400 MHz, Chloroform-d)  $\delta$  7.65 (d,  $J = 7.7$  Hz, 1H), 6.97 – 6.89 (m, 1H), 6.67 – 6.61 (m, 1H), 6.21 (q,  $J = 8.0$  Hz, 1H), 4.34 – 4.23 (m, 2H), 3.18 (s, 3H), 2.43 (s, 3H), 1.31 (t,  $J = 7.1$  Hz, 3H).

**<sup>13</sup>C NMR** (101 MHz, Chloroform-d)  $\delta$  164.0 (d,  $J = 2.3$  Hz), 159.0, 157.9, 146.9, 145.8, 124.2, 123.6, 123.4 (q,  $J = 280.3$  Hz), 118.0, 109.7, 64.4 (q,  $J = 29.8$  Hz), 62.5, 25.8, 22.5, 14.0.

**<sup>19</sup>F NMR** (376 MHz, Chloroform-d)  $\delta$  -71.88 (d,  $J = 8.1$  Hz).

**HRMS** (ESI+) Calcd. For C<sub>15</sub>H<sub>16</sub>F<sub>3</sub>N<sub>2</sub>O<sub>3</sub><sup>+</sup> ([M+H]<sup>+</sup>): 329.1108, found: 329.1104.

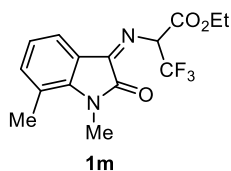

**Ethyl (Z)-2-((1,7-dimethyl-2-oxoindolin-3-ylidene)amino)-3,3,3-trifluoropropanoate:**

Yellow solid; 90% yield.

**<sup>1</sup>H NMR** (400 MHz, Chloroform-d)  $\delta$  7.70 – 7.55 (m, 1H), 7.20 (d,  $J = 7.7$  Hz, 1H), 7.04 – 6.96 (m, 1H), 6.23 – 6.17 (q,  $J = 8.1$  Hz, 1H), 4.36 – 4.22 (m, 2H), 3.46 (s, 3H), 2.54 (s, 3H), 1.31

(t,  $J = 7.1$  Hz, 3H).

$^{13}\text{C}$  NMR (101 MHz, Chloroform- $d$ )  $\delta$  163.8, 159.2, 158.1, 144.3, 142.3, 138.2, 123.5, 123.4 (q,  $J = 280.3$  Hz), 121.7, 120.6, 64.6 (q,  $J = 29.8$  Hz), 62.5, 29.2, 18.7, 14.0.

$^{19}\text{F}$  NMR (376 MHz, Chloroform- $d$ )  $\delta$  -71.88 (d,  $J = 8.1$  Hz).

HRMS (ESI+) Calcd. For  $\text{C}_{15}\text{H}_{16}\text{F}_3\text{N}_2\text{O}_3^+$  ( $[\text{M}+\text{H}]^+$ ): 329.1108, found: 329.1100.

### 3. General procedure for cascade $\beta$ -F elimination/electrocyclization/Diels-Alder/retro-Diels-Alder reaction.

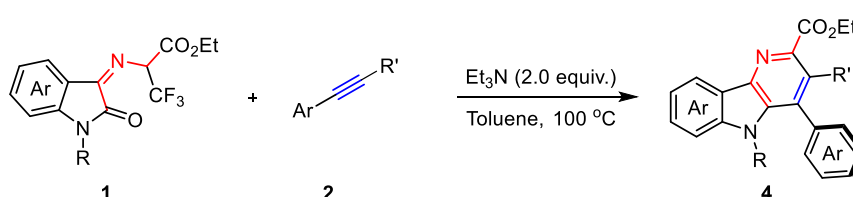

In a 25 mL nitrogen-filled dry Schlenk tube, isatin-activated ketoimine ester **1** (0.2 mmol), Arylalkyne **2** (0.4 mmol),  $\text{Et}_3\text{N}$  (0.4 mmol) and degassed toluene (2 mL) were added. The reaction was stirred for 12 h at  $100\text{ }^\circ\text{C}$  until starting material was consumed (monitored by TLC, caution: the released  $\text{COF}_2$  gas is toxic, please deal with the experiment in fume hood). The reaction mixture was concentrated via rotary evaporation under reduced pressure, and then purified by flash chromatography on silica gel (PE/EA = 10:1) to give product **4**.

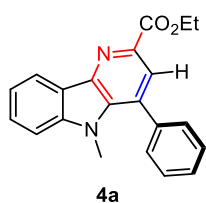

**Ethyl 5-methyl-4-phenyl-5H-pyrido[3,2-b]indole-2-carboxylate:** White solid; 81% yield.

$^1\text{H}$  NMR (400 MHz, Chloroform- $d$ )  $\delta$  8.58 (d,  $J = 7.8$  Hz, 1H), 8.11 (s, 1H), 7.60 (t,  $J = 7.6$  Hz, 1H), 7.52 (s, 5H), 7.45 – 7.33 (m, 2H), 4.53 (q,  $J = 7.1$  Hz, 2H), 3.44 (s, 3H), 1.49 (t,  $J = 7.1$  Hz, 3H).

$^{13}\text{C}$  NMR (101 MHz, Chloroform- $d$ )  $\delta$  166.1, 143.6, 143.0, 139.5, 137.3, 133.5, 132.2, 129.5, 128.64, 128.56, 128.4, 124.1, 122.0, 120.7, 109.2, 61.7, 32.5, 14.5.

HRMS (ESI+) Calcd. For  $\text{C}_{21}\text{H}_{19}\text{N}_2\text{O}_2^+$  ( $[\text{M}+\text{H}]^+$ ): 331.1441, found: 331.1443.



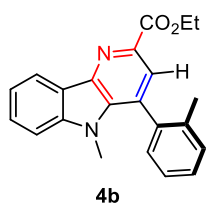

**Ethyl 5-methyl-4-(*o*-tolyl)-5H-pyrido[3,2-*b*]indole-2-carboxylate:** White solid; 90% yield.

**<sup>1</sup>H NMR** (400 MHz, Chloroform-*d*) δ 8.59 (d, *J* = 7.7 Hz, 1H), 8.05 (s, 1H), 7.60 (t, *J* = 7.4 Hz, 1H), 7.50 – 7.30 (m, 6H), 4.53 (q, *J* = 6.8 Hz, 2H), 3.35 (s, 3H), 2.08 (s, 3H), 1.49 (t, *J* = 7.1 Hz, 3H).

**<sup>13</sup>C NMR** (101 MHz, Chloroform-*d*) δ 166.2, 143.4, 142.7, 139.6, 136.6, 133.6, 131.5, 130.0, 129.8, 128.9, 128.6, 125.9, 123.8, 122.1, 122.0, 120.7, 109.1, 61.7, 30.9, 20.2, 14.5.

**HRMS** (ESI+) Calcd. For C<sub>22</sub>H<sub>21</sub>N<sub>2</sub>O<sub>2</sub><sup>+</sup> ([M+H]<sup>+</sup>): 345.1597, found: 345.1595.

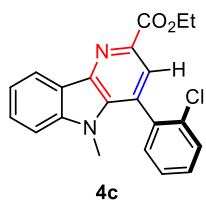

**Ethyl 4-(2-chlorophenyl)-5-methyl-5H-pyrido[3,2-*b*]indole-2-carboxylate:** White solid; 99% yield.

**<sup>1</sup>H NMR** (400 MHz, Chloroform-*d*) δ 8.59 (d, *J* = 7.8 Hz, 1H), 8.06 (s, 1H), 7.69 – 7.53 (m, 2H), 7.53 – 7.33 (m, 5H), 4.53 (q, *J* = 7.0 Hz, 2H), 3.42 (s, 3H), 1.49 (t, *J* = 7.1 Hz, 3H).

**<sup>13</sup>C NMR** (101 MHz, Chloroform-*d*) δ 166.0, 143.3, 142.9, 139.4, 136.2, 134.0, 133.5, 131.6, 130.3, 129.5, 128.9, 128.7, 127.0, 123.9, 122.0, 122.0, 120.7, 109.1, 61.7, 30.7, 14.5.

**HRMS** (ESI+) Calcd. For C<sub>21</sub>H<sub>18</sub>ClN<sub>2</sub>O<sub>2</sub><sup>+</sup> ([M+H]<sup>+</sup>): 365.1051, found: 365.1048.

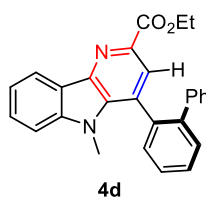

**Ethyl 4-([1,1'-biphenyl]-2-yl)-5-methyl-5H-pyrido[3,2-*b*]indole-2-carboxylate:** White solid; 65% yield.

**<sup>1</sup>H NMR** (400 MHz, Chloroform-*d*) δ 8.51 (d, *J* = 7.7 Hz, 1H), 8.05 (s, 1H), 7.64 – 7.45 (m, 5H), 7.37 – 7.27 (m, 2H), 7.12 – 6.97 (m, 5H), 4.49 (q, *J* = 6.9 Hz, 2H), 3.40 (s, 3H), 1.47 (t, *J*

= 7.1 Hz, 3H).

$^{13}\text{C}$  NMR (101 MHz, Chloroform-d)  $\delta$  165.1, 142.3, 141.6, 140.6, 138.7, 138.1, 134.4, 132.8, 130.6, 129.9, 129.3, 128.2, 128.1, 127.5, 127.1, 126.2, 126.1, 124.0, 120.9, 120.9, 119.5, 108.0, 60.6, 30.3, 13.4.

HRMS (ESI+) Calcd. For  $\text{C}_{27}\text{H}_{23}\text{N}_2\text{O}_2^+$  ( $[\text{M}+\text{H}]^+$ ): 407.1754, found: 407.1751.

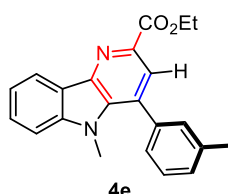

**Ethyl 5-methyl-4-(*m*-tolyl)-5H-pyrido[3,2-*b*]indole-2-carboxylate:** White solid; 83% yield.

$^1\text{H}$  NMR (400 MHz, Chloroform-d)  $\delta$  8.58 (d,  $J = 7.8$  Hz, 1H), 8.11 (s, 1H), 7.61 – 7.58 (m, 1H), 7.44 – 7.28 (m, 6H), 4.53 (q,  $J = 7.1$  Hz, 2H), 3.45 (s, 3H), 2.46 (s, 3H), 1.49 (t,  $J = 7.1$  Hz, 3H).

$^{13}\text{C}$  NMR (101 MHz, Chloroform-d)  $\delta$  166.2, 143.6, 143.0, 139.5, 138.2, 137.2, 133.6, 132.4, 130.2, 129.3, 128.6, 128.2, 126.6, 124.1, 122.1, 122.0, 120.6, 109.2, 61.7, 32.6, 21.5, 14.5.

HRMS (ESI+) Calcd. For  $\text{C}_{22}\text{H}_{21}\text{N}_2\text{O}_2^+$  ( $[\text{M}+\text{H}]^+$ ): 345.1597, found: 345.1596.

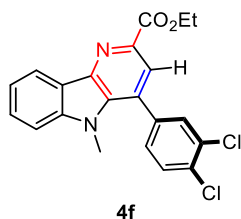

**Ethyl 4-(3,4-dichlorophenyl)-5-methyl-5H-pyrido[3,2-*b*]indole-2-carboxylate:** White solid; 87% yield.

$^1\text{H}$  NMR (400 MHz, Chloroform-d)  $\delta$  8.53 (d,  $J = 7.7$  Hz, 1H), 8.02 (s, 1H), 7.68 (d,  $J = 1.6$  Hz, 1H), 7.66 – 7.57 (m, 2H), 7.44 – 7.34 (m, 3H), 4.53 (q,  $J = 7.1$  Hz, 2H), 3.44 (s, 3H), 1.49 (t,  $J = 7.1$  Hz, 3H).

$^{13}\text{C}$  NMR (101 MHz, Chloroform-d)  $\delta$  165.8, 143.6, 143.3, 139.5, 137.2, 133.1, 133.0, 132.8, 131.4, 130.4, 129.3, 128.93, 128.89, 123.7, 122.0, 121.9, 121.0, 109.3, 61.8, 32.8, 14.5.

HRMS (ESI+) Calcd. For  $\text{C}_{21}\text{H}_{17}\text{Cl}_2\text{N}_2\text{O}_2^+$  ( $[\text{M}+\text{H}]^+$ ): 399.0662, found: 399.0658.

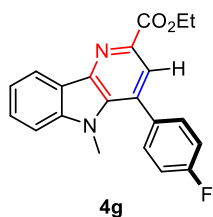

**Ethyl 4-(4-fluorophenyl)-5-methyl-5H-pyrido[3,2-b]indole-2-carboxylate:** White solid; 62% yield.

**<sup>1</sup>H NMR** (400 MHz, Chloroform-d)  $\delta$  8.56 (d,  $J = 7.8$  Hz, 1H), 8.07 (s, 1H), 7.62 – 7.60 (m, 1H), 7.55 – 7.46 (m, 2H), 7.44 – 7.34 (m, 2H), 7.23 (t,  $J = 8.6$  Hz, 2H), 4.53 (q,  $J = 7.1$  Hz, 2H), 3.44 (s, 3H), 1.49 (t,  $J = 7.1$  Hz, 3H).

**<sup>13</sup>C NMR** (101 MHz, Chloroform-d)  $\delta$  166.1, 162.9 (d,  $J = 249.7$  Hz), 143.6, 143.1, 139.5, 133.5, 133.2 (d,  $J = 3.4$  Hz), 131.3 (d,  $J = 8.2$  Hz), 131.1, 128.8, 124.2, 122.0, 122.0, 120.8, 115.5 (d,  $J = 21.7$  Hz), 109.2, 61.7, 32.6, 14.5.

**<sup>19</sup>F NMR** (376 MHz, Chloroform-d)  $\delta$  -112.75 – -112.82 (m).

**HRMS** (ESI+) Calcd. For  $C_{21}H_{18}FN_2O_2^+$  ( $[M+H]^+$ ): 349.1347, found: 349.1343.

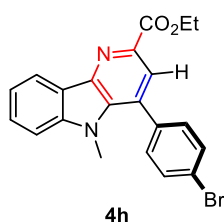

**Ethyl 4-(4-bromophenyl)-5-methyl-5H-pyrido[3,2-b]indole-2-carboxylate:** White solid; 74% yield.

**<sup>1</sup>H NMR** (400 MHz, Chloroform-d)  $\delta$  8.57 (d,  $J = 7.8$  Hz, 1H), 8.07 (s, 1H), 7.68 (d,  $J = 8.3$  Hz, 2H), 7.64 – 7.60 (m, 1H), 7.45 – 7.36 (m, 4H), 4.53 (q,  $J = 7.1$  Hz, 2H), 3.47 (s, 3H), 1.49 (t,  $J = 7.1$  Hz, 3H).

**<sup>13</sup>C NMR** (101 MHz, Chloroform-d)  $\delta$  166.0, 143.6, 143.2, 139.6, 136.2, 133.3, 131.7, 131.1, 130.8, 128.8, 123.9, 123.0, 122.1, 122.0, 120.9, 109.2, 61.8, 32.7, 14.5.

**HRMS** (ESI+) Calcd. For  $C_{21}H_{18}BrN_2O_2^+$  ( $[M+H]^+$ ): 409.0546, found: 409.0540.

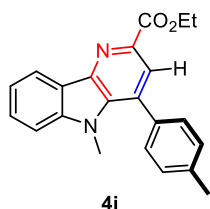

**Ethyl 5-methyl-4-(*p*-tolyl)-5H-pyrido[3,2-*b*]indole-2-carboxylate:** White solid; 99% yield.

**<sup>1</sup>H NMR** (400 MHz, Chloroform-*d*) δ 8.58 (d, *J* = 7.8 Hz, 1H), 8.10 (s, 1H), 7.62 – 7.58 (m, 1H), 7.42 – 7.31 (m, 6H), 4.53 (q, *J* = 7.1 Hz, 2H), 3.47 (s, 3H), 2.48 (s, 3H), 1.49 (t, *J* = 7.1 Hz, 3H).

**<sup>13</sup>C NMR** (101 MHz, Chloroform-*d*) δ 166.2, 143.6, 143.0, 139.5, 138.5, 134.3, 133.7, 132.4, 129.4, 129.1, 128.6, 124.3, 122.1, 122.0, 120.6, 109.2, 61.7, 32.6, 21.4, 14.5.

**HRMS** (ESI+) Calcd. For C<sub>22</sub>H<sub>21</sub>N<sub>2</sub>O<sub>2</sub><sup>+</sup> ([M+H]<sup>+</sup>): 345.1597, found: 345.1594.

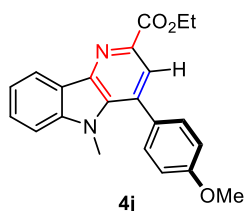

**Ethyl 4-(4-methoxyphenyl)-5-methyl-5H-pyrido[3,2-*b*]indole-2-carboxylate:** White solid; 85% yield.

**<sup>1</sup>H NMR** (400 MHz, Chloroform-*d*) δ 8.57 (d, *J* = 7.8 Hz, 1H), 8.09 (s, 1H), 7.66 – 7.55 (m, 1H), 7.49 – 7.32 (m, 4H), 7.05 (d, *J* = 8.7 Hz, 2H), 4.53 (q, *J* = 7.1 Hz, 2H), 3.91 (s, 3H), 3.47 (s, 3H), 1.49 (t, *J* = 7.1 Hz, 3H).

**<sup>13</sup>C NMR** (101 MHz, Chloroform-*d*) δ 166.2, 159.9, 143.6, 143.0, 139.6, 133.8, 132.1, 130.7, 129.4, 128.6, 124.4, 122.1, 122.0, 120.6, 113.8, 109.2, 61.7, 55.4, 32.6, 14.5.

**HRMS** (ESI+) Calcd. For C<sub>22</sub>H<sub>21</sub>N<sub>2</sub>O<sub>3</sub><sup>+</sup> ([M+H]<sup>+</sup>): 361.1547, found: 361.1543.

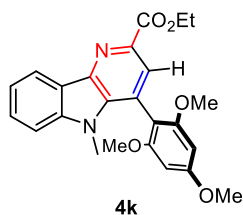

**Ethyl (*r*)-5-methyl-4-(2,4,6-trimethoxyphenyl)-5H-pyrido[3,2-*b*]indole-2-carboxylate:** White solid; 90% yield.

**<sup>1</sup>H NMR** (400 MHz, Chloroform-d)  $\delta$  8.58 (d,  $J = 7.7$  Hz, 1H), 8.02 (s, 1H), 7.57 (t,  $J = 7.6$  Hz, 1H), 7.43 – 7.30 (m, 2H), 6.27 (s, 2H), 4.51 (q,  $J = 7.0$  Hz, 2H), 3.92 (s, 3H), 3.67 (s, 6H), 3.48 (s, 3H), 1.48 (t,  $J = 7.1$  Hz, 3H).

**<sup>13</sup>C NMR** (101 MHz, Chloroform-d)  $\delta$  166.5, 162.1, 158.9, 143.1, 142.5, 139.3, 135.3, 128.1, 126.3, 124.9, 122.1, 121.9, 120.2, 108.8, 106.8, 90.5, 61.5, 55.7, 55.5, 30.1, 14.5.

**HRMS** (ESI+) Calcd. For C<sub>24</sub>H<sub>25</sub>N<sub>2</sub>O<sub>5</sub><sup>+</sup> ([M+H]<sup>+</sup>): 421.1758, found: 421.1758.

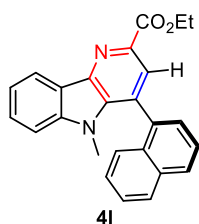

**Ethyl 5-methyl-4-(naphthalen-1-yl)-5H-pyrido[3,2-b]indole-2-carboxylate:** White solid; 99% yield.

**<sup>1</sup>H NMR** (400 MHz, Chloroform-d)  $\delta$  8.64 (d,  $J = 7.8$  Hz, 1H), 8.19 (s, 1H), 7.99 (dd,  $J = 18.8$ , 8.0 Hz, 2H), 7.66 – 7.49 (m, 4H), 7.44 – 7.29 (m, 4H), 4.53 (q,  $J = 7.1$  Hz, 2H), 3.08 (s, 3H), 1.47 (t,  $J = 7.1$  Hz, 3H).

**<sup>13</sup>C NMR** (101 MHz, Chloroform-d)  $\delta$  166.1, 143.3, 142.7, 139.7, 134.7, 134.4, 133.2, 132.4, 130.2, 129.2, 128.7, 128.5, 127.8, 127.0, 126.5, 125.8, 125.2, 124.8, 122.1, 122.0, 120.7, 109.1, 61.7, 31.1, 14.5.

**HRMS** (ESI+) Calcd. For C<sub>25</sub>H<sub>21</sub>N<sub>2</sub>O<sub>2</sub><sup>+</sup> ([M+H]<sup>+</sup>): 381.1598, found: 381.1593.

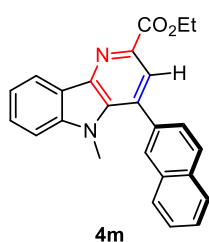

**Ethyl 5-methyl-4-(naphthalen-2-yl)-5H-pyrido[3,2-b]indole-2-carboxylate:** White solid; 93% yield.

**<sup>1</sup>H NMR** (400 MHz, Chloroform-d)  $\delta$  8.60 (d,  $J = 7.7$  Hz, 1H), 8.20 (s, 1H), 8.02 – 7.89 (m, 4H), 7.65 – 7.55 (m, 4H), 7.42 – 7.33 (m, 2H), 4.53 (q,  $J = 7.1$  Hz, 2H), 3.42 (s, 3H), 1.49 (t,  $J = 7.1$  Hz, 3H).

$^{13}\text{C}$  NMR (101 MHz, Chloroform- $d$ )  $\delta$  166.1, 143.7, 143.1, 139.5, 134.7, 133.7, 133.0, 132.9, 132.2, 128.7, 128.6, 128.2, 128.0, 127.9, 127.3, 127.0, 126.9, 124.4, 122.1, 120.8, 109.2, 61.7, 32.7, 14.5.

**HRMS** (ESI+) Calcd. For  $\text{C}_{25}\text{H}_{21}\text{N}_2\text{O}_2^+$  ( $[\text{M}+\text{H}]^+$ ): 381.1598, found: 381.1593.

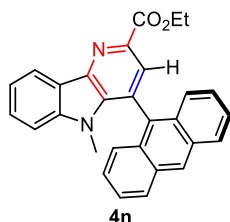

**Ethyl (*r*)-4-(anthracen-9-yl)-5-methyl-5H-pyrido[3,2-*b*]indole-2-carboxylate:** White solid; 99% yield.

$^1\text{H}$  NMR (400 MHz, Chloroform- $d$ )  $\delta$  8.70 (d,  $J = 7.8$  Hz, 1H), 8.65 (s, 1H), 8.22 (s, 1H), 8.12 (d,  $J = 8.5$  Hz, 2H), 7.59 - 7.57 (m, 1H), 7.54 - 7.46 (m, 2H), 7.46 - 7.31 (m, 5H), 7.28 (s, 1H), 4.52 (q,  $J = 7.1$  Hz, 2H), 2.80 (s, 3H), 1.45 (t,  $J = 7.1$  Hz, 3H).

$^{13}\text{C}$  NMR (101 MHz, Chloroform- $d$ )  $\delta$  166.1, 143.3, 142.9, 139.9, 135.1, 131.1, 130.7, 130.3, 128.8, 128.7, 128.2, 126.7, 126.2, 125.7, 125.6, 122.2, 122.1, 120.8, 109.1, 61.7, 30.3, 14.5.

**HRMS** (ESI+) Calcd. For  $\text{C}_{29}\text{H}_{23}\text{N}_2\text{O}_2^+$  ( $[\text{M}+\text{H}]^+$ ): 431.1754, found: 431.1753.

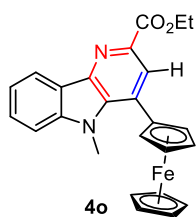

**Ethyl 5-methyl-4-ferrocene-5H-pyrido[3,2-*b*] indole-2-carboxylate:** White solid; 80% yield.

$^1\text{H}$  NMR (400 MHz, Chloroform- $d$ )  $\delta$  8.78 (s, 1H), 8.54 (d,  $J = 7.7$  Hz, 1H), 7.57 (t,  $J = 7.6$  Hz, 1H), 7.38 - 7.31 (m, 2H), 4.64 - 4.54 (m, 4H), 4.45 - 4.41 (m, 2H), 4.31 (s, 5H), 3.54 (s, 3H), 1.54 (t,  $J = 7.1$  Hz, 3H).

$^{13}\text{C}$  NMR (101 MHz, Chloroform- $d$ )  $\delta$  166.3, 143.8, 142.7, 139.0, 135.4, 129.2, 128.5, 126.9, 122.0, 120.6, 109.2, 85.6, 71.7, 69.9, 68.3, 61.7, 32.7, 14.5.

**HRMS** (ESI+) Calcd. For  $\text{C}_{25}\text{H}_{23}\text{FeN}_2\text{O}_2^+$  ( $[\text{M}+\text{H}]^+$ ): 439.1104, found: 439.1096.

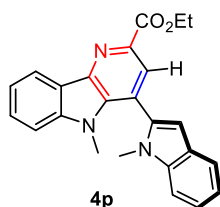

**Ethyl 5-methyl-4-(1-methyl-1H-indol-2-yl)-5H-pyrido[3,2-b]indole-2-carboxylate:** White solid; 87% yield.

**<sup>1</sup>H NMR** (400 MHz, Chloroform-*d*) δ 8.61 (d, *J* = 7.7 Hz, 1H), 8.22 (s, 1H), 7.73 (d, *J* = 7.8 Hz, 1H), 7.63 (t, *J* = 7.6 Hz, 1H), 7.45 – 7.31 (m, 4H), 7.25 – 7.19 (m, 1H), 6.75 (s, 1H), 4.53 (q, *J* = 7.1 Hz, 2H), 3.54 (s, 3H), 3.39 (s, 3H), 1.49 (t, *J* = 7.1 Hz, 3H).

**<sup>13</sup>C NMR** (101 MHz, Chloroform-*d*) δ 165.9, 143.6, 143.1, 139.5, 137.5, 134.7, 134.4, 129.0, 127.9, 125.1, 122.6, 122.2, 122.1, 122.0, 121.1, 121.1, 120.5, 109.7, 109.3, 104.3, 61.8, 30.8, 30.5, 14.5.

**HRMS** (ESI+) Calcd. For C<sub>24</sub>H<sub>22</sub>N<sub>3</sub>O<sub>2</sub><sup>+</sup> ([M+H]<sup>+</sup>): 384.1707, found: 384.1702.

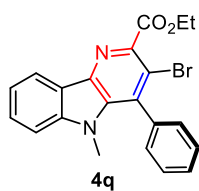

**Ethyl 3-bromo-5-methyl-4-phenyl-5H-pyrido[3,2-b]indole-2-carboxylate:** White solid; 80% yield.

**<sup>1</sup>H NMR** (400 MHz, Chloroform-*d*) δ 8.43 – 8.39 (m, 1H), 7.60 – 7.46 (m, 4H), 7.37 – 7.29 (m, 4H), 4.54 (q, *J* = 7.2 Hz, 2H), 3.15 (s, 3H), 1.48 (t, *J* = 7.2 Hz, 3H).

**<sup>13</sup>C NMR** (101 MHz, Chloroform-*d*) δ 167.1, 143.3, 142.7, 140.5, 136.2, 133.4, 133.2, 129.9, 129.0, 128.8, 128.5, 121.5, 121.1, 120.8, 116.1, 109.3, 62.2, 31.6, 14.3.

**HRMS** (ESI+) Calcd. For C<sub>21</sub>H<sub>18</sub>BrN<sub>2</sub>O<sub>2</sub><sup>+</sup> ([M+H]<sup>+</sup>): 409.0546, found: 409.0542.

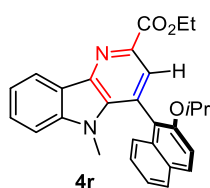

**Ethyl 4-(2-isopropoxynaphthalen-1-yl)-5-methyl-5H-pyrido[3,2-b]indole-2-carboxylate:** White solid; 81% yield.

**<sup>1</sup>H NMR** (400 MHz, Chloroform-*d*) δ 8.65 (d, *J* = 7.8 Hz, 1H), 8.12 (s, 1H), 7.99 (d, *J* = 9.1 Hz, 1H), 7.88 (d, *J* = 8.0 Hz, 1H), 7.62 – 7.54 (m, 1H), 7.44 – 7.29 (m, 5H), 7.21 (d, *J* = 8.3 Hz, 1H), 4.63 – 4.47 (m, 3H), 3.22 (s, 3H), 1.47 (t, *J* = 7.1 Hz, 3H), 1.10 (d, *J* = 6.1 Hz, 3H), 1.06 (d, *J* = 6.1 Hz, 3H).

**<sup>13</sup>C NMR** (101 MHz, Chloroform-*d*) δ 166.3, 153.3, 143.3, 142.7, 139.5, 135.3, 133.8, 130.5, 128.8, 128.4, 128.1, 127.3, 127.0, 125.8, 125.0, 124.2, 122.1, 122.0, 121.0, 120.4, 116.3, 109.0, 72.0, 61.6, 30.2, 22.5, 22.2, 14.5.

**HRMS** (ESI+) Calcd. For C<sub>28</sub>H<sub>27</sub>N<sub>2</sub>O<sub>3</sub><sup>+</sup> ([M+H]<sup>+</sup>): 439.2016, found: 439.2011.

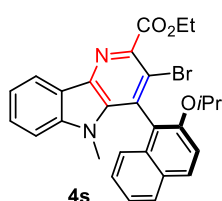

**Ethyl 3-bromo-4-(2-isopropoxynaphthalen-1-yl)-5-methyl-5H-pyrido[3,2-b]indole-2-carboxylate:** White solid; 66% yield.

**<sup>1</sup>H NMR** (400 MHz, Chloroform-*d*) δ 8.50 (d, *J* = 7.8 Hz, 1H), 8.02 (d, *J* = 9.1 Hz, 1H), 7.91 – 7.82 (m, 1H), 7.63 – 7.49 (m, 1H), 7.42 – 7.26 (m, 5H), 7.10 – 7.01 (m, 1H), 4.71 – 4.61 (m, 1H), 4.55 (q, *J* = 7.1 Hz, 2H), 3.04 (s, 3H), 1.48 (t, *J* = 7.1 Hz, 3H), 1.17 (d, *J* = 6.1 Hz, 3H), 1.13 (d, *J* = 6.1 Hz, 3H).

**<sup>13</sup>C NMR** (101 MHz, Chloroform-*d*) δ 167.1, 153.5, 143.2, 142.8, 140.3, 134.6, 133.3, 131.1, 129.3, 128.5, 128.5, 128.2, 127.6, 124.4, 124.2, 121.6, 121.4, 120.6, 119.5, 118.0, 115.2, 109.2, 71.4, 62.1, 30.0, 22.6, 22.4, 14.3.

**HRMS** (ESI+) Calcd. For C<sub>28</sub>H<sub>26</sub>BrN<sub>2</sub>O<sub>3</sub><sup>+</sup> ([M+H]<sup>+</sup>): 517.1121, found: 517.1115.

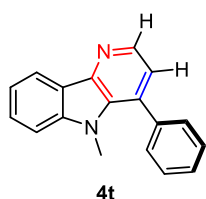

**5-methyl-4-phenyl-5H-pyrido[3,2-b]indole:** White solid; 46% yield.

**<sup>1</sup>H NMR** (400 MHz, Chloroform-*d*) δ 8.54 (d, *J* = 4.8 Hz, 1H), 8.50 – 8.37 (m, 1H), 7.59 – 7.53 (m, 1H), 7.52 – 7.46 (m, 5H), 7.38 (d, *J* = 8.3 Hz, 1H), 7.36 – 7.30 (m, 1H), 7.19 (d, *J* = 4.8 Hz,



1H), 3.40 (s, 3H).

<sup>13</sup>C NMR (101 MHz, Chloroform-d) δ 142.8, 142.6, 141.2, 137.9, 132.9, 132.0, 129.5, 128.3, 127.9, 122.0, 120.9, 120.1, 109.1, 32.5.

HRMS (ESI+) Calcd. For C<sub>18</sub>H<sub>15</sub>N<sub>2</sub><sup>+</sup> ([M+H]<sup>+</sup>): 259.1230, found: 259.1224.

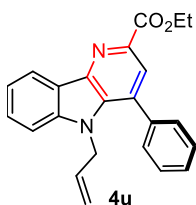

**Ethyl 5-allyl-4-phenyl-5H-pyrido[3,2-b]indole-2-carboxylate:** White solid; 67% yield.

<sup>1</sup>H NMR (400 MHz, Chloroform-d) δ 8.60 (d, *J* = 7.8 Hz, 1H), 8.08 (s, 1H), 7.65 – 7.52 (m, 1H), 7.42 – 7.33 (m, 5H), 7.39 – 7.36 (m, 2H), 5.64 – 5.57 (m, 1H), 5.01 (d, *J* = 10.4 Hz, 1H), 4.76 – 4.41 (m, 5H), 1.49 (t, *J* = 7.1 Hz, 3H).

<sup>13</sup>C NMR (101 MHz, Chloroform-d) δ 166.1, 143.3, 143.1, 139.7, 137.2, 133.0, 132.5, 132.0, 129.3, 128.73, 128.68, 128.3, 124.3, 122.3, 122.1, 120.9, 116.7, 110.0, 61.7, 46.8, 14.5.

HRMS (ESI+) Calcd. For C<sub>23</sub>H<sub>21</sub>N<sub>2</sub>O<sub>2</sub><sup>+</sup> ([M+H]<sup>+</sup>): 357.1598, found: 357.1592.

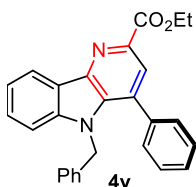

**Ethyl 5-benzyl-4-phenyl-5H-pyrido[3,2-b]indole-2-carboxylate:** White solid; 85% yield.

<sup>1</sup>H NMR (400 MHz, Chloroform-d) δ 8.69 – 8.54 (m, 1H), 8.05 (s, 1H), 7.57 – 7.49 (m, 1H), 7.42 – 7.34 (m, 2H), 7.33 – 7.26 (m, 3H), 7.25 – 7.20 (m, 2H), 7.17 – 7.05 (m, 3H), 6.58 – 6.45 (m, 2H), 5.18 (s, 2H), 4.53 (q, *J* = 7.1 Hz, 2H), 1.48 (t, *J* = 7.1 Hz, 3H).

<sup>13</sup>C NMR (101 MHz, Chloroform-d) δ 166.1, 143.5, 143.4, 139.9, 136.9, 136.5, 133.1, 132.8, 129.2, 128.9, 128.5, 128.2, 127.2, 125.5, 124.4, 122.3, 122.2, 121.1, 109.9, 61.7, 48.0, 14.5.

HRMS (ESI+) Calcd. For C<sub>27</sub>H<sub>23</sub>N<sub>2</sub>O<sub>2</sub><sup>+</sup> ([M+H]<sup>+</sup>): 407.1754, found: 407.1749.

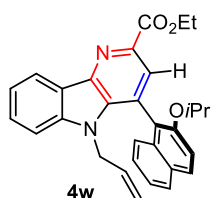

**Ethyl 5-allyl-4-(2-isopropoxynaphthalen-1-yl)-5H-pyrido[3,2-b]indole-2-carboxylate:**

White solid; 98% yield.

**<sup>1</sup>H NMR** (400 MHz, Chloroform-d)  $\delta$  8.65 (d,  $J$  = 7.8 Hz, 1H), 8.10 (s, 1H), 7.98 (d,  $J$  = 9.1 Hz, 1H), 7.87 (d,  $J$  = 8.0 Hz, 1H), 7.59 – 7.52 (m, 1H), 7.42 – 7.26 (m, 5H), 7.15 (d,  $J$  = 8.4 Hz, 1H), 5.41 – 5.27 (m, 1H), 4.69 (dd,  $J$  = 10.3, 0.9 Hz, 1H), 4.63 – 4.41 (m, 4H), 4.39 – 4.21 (m, 2H), 1.47 (t,  $J$  = 7.1 Hz, 3H), 1.11 (d,  $J$  = 6.1 Hz, 3H), 1.07 (d,  $J$  = 6.0 Hz, 3H).

**<sup>13</sup>C NMR** (101 MHz, Chloroform-d)  $\delta$  166.3, 153.2, 143.0, 142.8, 139.7, 134.6, 133.6, 132.1, 130.6, 128.7, 128.4, 128.1, 127.2, 127.1, 125.9, 125.1, 124.1, 122.5, 122.0, 120.6, 120.5, 116.7, 115.9, 109.8, 71.8, 61.6, 46.4, 22.5, 22.2, 14.5.

**HRMS** (ESI+) Calcd. For C<sub>30</sub>H<sub>29</sub>N<sub>2</sub>O<sub>3</sub><sup>+</sup> ([M+H]<sup>+</sup>): 465.2173, found: 465.2166.

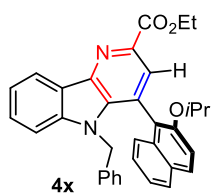

**Ethyl 5-benzyl-4-(2-isopropoxynaphthalen-1-yl)-5H-pyrido[3,2-b]indole-2-carboxylate:**

White solid; 79% yield.

**<sup>1</sup>H NMR** (400 MHz, Chloroform-d)  $\delta$  8.69 (d,  $J$  = 7.7 Hz, 1H), 8.07 (s, 1H), 7.89 (d,  $J$  = 9.0 Hz, 1H), 7.77 (d,  $J$  = 8.1 Hz, 1H), 7.53 – 7.51 (m, 1H), 7.40 – 7.38 (m, 1H), 7.34 – 7.17 (m, 3H), 7.13 – 7.11 (m, 1H), 7.01 – 6.87 (m, 2H), 6.83 – 6.81 (m, 2H), 6.31 (d,  $J$  = 7.4 Hz, 2H), 4.95 (s, 2H), 4.51 (q,  $J$  = 7.0 Hz, 2H), 4.39 – 4.33 (m, 1H), 1.46 (t,  $J$  = 7.1 Hz, 3H), 1.02 (d,  $J$  = 6.1 Hz, 3H), 0.98 (d,  $J$  = 6.1 Hz, 3H).

**<sup>13</sup>C NMR** (101 MHz, Chloroform-d)  $\delta$  166.3, 153.2, 143.4, 143.2, 139.9, 136.8, 134.8, 133.7, 130.5, 128.7, 128.5, 128.0, 127.8, 127.5, 127.0, 126.8, 126.1, 125.4, 124.7, 123.9, 122.4, 122.1, 120.8, 120.2, 115.7, 109.7, 71.5, 61.6, 47.3, 22.5, 22.0, 14.5.

**HRMS** (ESI+) Calcd. For C<sub>34</sub>H<sub>31</sub>N<sub>2</sub>O<sub>3</sub><sup>+</sup> ([M+H]<sup>+</sup>): 515.2329, found: 515.2322.

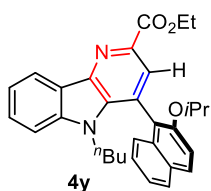

**Ethyl 5-butyl-4-(2-isopropoxynaphthalen-1-yl)-5H-pyrido[3,2-b]indole-2-carboxylate:**

White solid; 93% yield.

**<sup>1</sup>H NMR** (400 MHz, Chloroform-d)  $\delta$  8.65 (d,  $J = 7.8$  Hz, 1H), 8.10 (s, 1H), 7.99 (d,  $J = 9.1$  Hz, 1H), 7.88 (d,  $J = 8.0$  Hz, 1H), 7.57 – 7.55 (m, 1H), 7.44 – 7.27 (m, 5H), 7.17 (d,  $J = 8.4$  Hz, 1H), 4.64 – 4.61 (m, 1H), 4.52 (q,  $J = 7.1$  Hz, 2H), 3.75 – 3.51 (m, 2H), 1.47 (t,  $J = 7.1$  Hz, 3H), 1.42 – 1.28 (m, 1H), 1.13 (d,  $J = 6.1$  Hz, 3H), 1.09 (d,  $J = 6.0$  Hz, 3H), 1.06 – 0.95 (m, 1H), 0.74 – 0.59 (m, 1H), 0.59 – 0.43 (m, 1H), 0.37 (t,  $J = 7.3$  Hz, 3H).

**<sup>13</sup>C NMR** (101 MHz, Chloroform-d)  $\delta$  166.4, 153.2, 143.0, 142.7, 139.4, 134.4, 133.6, 130.5, 128.7, 128.3, 128.1, 127.2, 126.9, 125.9, 124.9, 124.1, 122.3, 122.0, 120.8, 120.3, 115.7, 109.3, 71.7, 61.5, 44.1, 31.2, 22.5, 22.2, 19.8, 14.5, 13.2.

**HRMS** (ESI+) Calcd. For  $C_{31}H_{33}N_2O_3^+$  ( $[M+H]^+$ ): 481.2486, found: 481.2480.

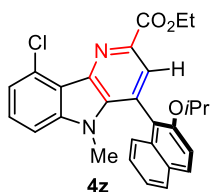

**Ethyl 9-chloro-4-(2-isopropoxynaphthalen-1-yl)-5-methyl-5H-pyrido[3,2-b]indole-2-carboxylate:** White solid; 87% yield.

**<sup>1</sup>H NMR** (400 MHz, Chloroform-d)  $\delta$  8.15 (s, 1H), 7.99 (d,  $J = 9.0$  Hz, 1H), 7.89 (d,  $J = 7.9$  Hz, 1H), 7.48 - 7.46 (m, 1H), 7.42 – 7.30 (m, 4H), 7.26 (d,  $J = 7.9$  Hz, 1H), 7.19 (d,  $J = 8.4$  Hz, 1H), 4.60 – 4.55 (m, 1H), 4.51 (q,  $J = 7.1$  Hz, 2H), 3.23 (s, 3H), 1.50 (t,  $J = 7.1$  Hz, 3H), 1.09 (d,  $J = 6.1$  Hz, 3H), 1.04 (d,  $J = 6.0$  Hz, 3H).

**<sup>13</sup>C NMR** (101 MHz, Chloroform-d)  $\delta$  166.2, 153.3, 144.2, 141.5, 140.2, 135.3, 133.7, 130.7, 129.6, 128.8, 128.3, 128.2, 127.4, 127.3, 125.8, 124.8, 124.2, 121.8, 120.8, 119.1, 116.2, 107.5, 72.1, 61.6, 30.5, 22.5, 22.2, 14.4.

**HRMS** (ESI+) Calcd. For  $C_{28}H_{26}ClN_2O_3^+$  ( $[M+H]^+$ ): 473.1626, found: 473.1624.

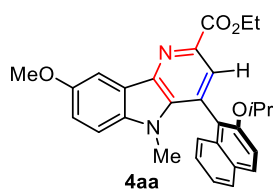

**Ethyl 4-(2-isopropoxynaphthalen-1-yl)-8-methoxy-5-methyl-5H-pyrido[3,2-b]indole-2-carboxylate:** White solid; 87% yield.

**<sup>1</sup>H NMR** (400 MHz, Chloroform-d)  $\delta$  8.11 (d,  $J$  = 10.6 Hz, 2H), 7.98 (d,  $J$  = 9.0 Hz, 1H), 7.88 (d,  $J$  = 7.9 Hz, 1H), 7.46 – 7.15 (m, 6H), 4.65 – 4.44 (m, 3H), 3.99 (s, 3H), 3.19 (s, 3H), 1.47 (t,  $J$  = 7.0 Hz, 3H), 1.10 (d,  $J$  = 6.1 Hz, 3H), 1.07 (d,  $J$  = 6.4 Hz, 3H).

**<sup>13</sup>C NMR** (101 MHz, Chloroform-d)  $\delta$  166.3, 154.6, 153.3, 142.4, 139.0, 138.2, 135.6, 133.8, 130.5, 128.8, 128.1, 127.3, 127.0, 125.5, 125.0, 124.2, 122.4, 121.0, 118.7, 116.3, 110.0, 103.3, 72.0, 61.6, 56.1, 30.3, 22.5, 22.2, 14.5.

**HRMS** (ESI+) Calcd. For C<sub>29</sub>H<sub>29</sub>N<sub>2</sub>O<sub>4</sub><sup>+</sup> ([M+H]<sup>+</sup>): 469.2122, found: 469.2119.

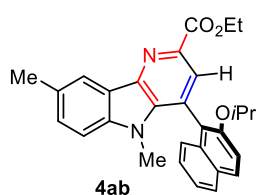

**Ethyl 4-(2-isopropoxynaphthalen-1-yl)-5,8-dimethyl-5H-pyrido[3,2-b]indole-2-carboxylate:** White solid; 80% yield.

**<sup>1</sup>H NMR** (400 MHz, Chloroform-d)  $\delta$  8.46 (s, 1H), 8.10 (s, 1H), 7.98 (d,  $J$  = 9.0 Hz, 1H), 7.88 (d,  $J$  = 8.0 Hz, 1H), 7.45 – 7.29 (m, 4H), 7.22 (dd,  $J$  = 8.3, 3.3 Hz, 2H), 4.62 – 4.46 (m, 3H), 3.19 (s, 3H), 2.57 (s, 3H), 1.47 (t,  $J$  = 7.1 Hz, 3H), 1.09 (d,  $J$  = 6.1 Hz, 3H), 1.06 (d,  $J$  = 6.0 Hz, 3H).

**<sup>13</sup>C NMR** (101 MHz, Chloroform-d)  $\delta$  166.3, 153.3, 142.5, 141.6, 139.2, 135.4, 133.8, 130.4, 130.0, 129.8, 128.8, 128.1, 127.2, 126.7, 125.6, 125.0, 124.2, 122.2, 121.8, 121.1, 116.3, 108.7, 72.0, 61.5, 30.2, 22.5, 22.2, 21.3, 14.5.

**HRMS** (ESI+) Calcd. For C<sub>29</sub>H<sub>29</sub>N<sub>2</sub>O<sub>3</sub><sup>+</sup> ([M+H]<sup>+</sup>): 453.2173, found: 453.2168.

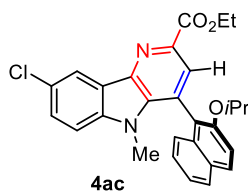

**Ethyl 8-chloro-4-(2-isopropoxynaphthalen-1-yl)-5-methyl-5H-pyrido[3,2-b]indole-2-carboxylate:** White solid; 81% yield.

**<sup>1</sup>H NMR** (400 MHz, Chloroform-d)  $\delta$  8.62 (d,  $J = 2.0$  Hz, 1H), 8.13 (s, 1H), 8.00 (d,  $J = 9.1$  Hz, 1H), 7.89 (d,  $J = 7.8$  Hz, 1H), 7.52 (dd,  $J = 8.7, 2.1$  Hz, 1H), 7.43 – 7.30 (m, 3H), 7.26 (d,  $J = 8.7$  Hz, 1H), 7.21 (d,  $J = 8.4$  Hz, 1H), 4.64 – 4.47 (m, 3H), 3.21 (s, 3H), 1.47 (t,  $J = 7.1$  Hz, 3H), 1.10 (d,  $J = 6.0$  Hz, 3H), 1.06 (d,  $J = 6.0$  Hz, 3H).

**<sup>13</sup>C NMR** (101 MHz, Chloroform-d)  $\delta$  166.1, 153.3, 141.6, 141.5, 140.0, 135.7, 133.7, 130.7, 128.8, 128.4, 128.2, 127.6, 127.4, 126.23, 126.19, 124.8, 124.2, 123.2, 121.6, 120.5, 116.1, 110.1, 72.0, 61.7, 30.4, 22.5, 22.2, 14.5.

**HRMS** (ESI+) Calcd. For  $C_{28}H_{26}ClN_2O_3^+$  ( $[M+H]^+$ ): 473.1626, found: 473.1620.

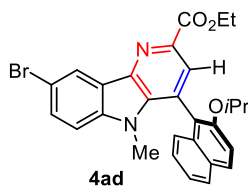

**Ethyl 8-bromo-4-(2-isopropoxynaphthalen-1-yl)-5-methyl-5H-pyrido[3,2-b]indole-2-carboxylate:** White solid; 86% yield.

**<sup>1</sup>H NMR** (400 MHz, Chloroform-d)  $\delta$  8.77 (s, 1H), 8.13 (s, 1H), 8.00 (d,  $J = 9.0$  Hz, 1H), 7.89 (d,  $J = 7.9$  Hz, 1H), 7.65 (d,  $J = 8.3$  Hz, 1H), 7.45 – 7.30 (m, 3H), 7.24 – 7.17 (m, 2H), 4.66 – 4.42 (m, 3H), 3.20 (s, 3H), 1.47 (t,  $J = 7.0$  Hz, 3H), 1.10 (d,  $J = 6.0$  Hz, 3H), 1.06 (d,  $J = 6.0$  Hz, 3H).

**<sup>13</sup>C NMR** (101 MHz, Chloroform-d)  $\delta$  166.1, 153.3, 141.8, 141.4, 140.1, 135.6, 133.7, 131.0, 130.7, 128.8, 128.2, 127.6, 127.4, 126.2, 124.8, 124.6, 124.2, 123.8, 120.5, 116.1, 113.5, 110.6, 72.0, 61.7, 30.4, 22.5, 22.2, 14.5.

**HRMS** (ESI+) Calcd. For  $C_{28}H_{26}BrN_2O_3^+$  ( $[M+H]^+$ ): 517.1121, found: 517.1116.

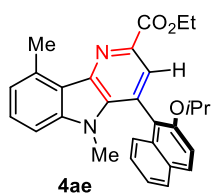

**Ethyl 4-(2-isopropoxynaphthalen-1-yl)-5,9-dimethyl-5H-pyrido[3,2-b]indole-2-carboxylate:** White solid; 99% yield.

**<sup>1</sup>H NMR** (400 MHz, Chloroform-d)  $\delta$  8.09 (s, 1H), 7.97 (d,  $J = 9.1$  Hz, 1H), 7.87 (d,  $J = 8.1$  Hz, 1H), 7.46 – 7.44 (m, 1H), 7.42 – 7.33 (m, 2H), 7.31 – 7.27 (m, 1H), 7.21 – 7.13 (m, 3H), 4.61 – 4.44 (m, 3H), 3.26 (s, 3H), 3.19 (s, 3H), 1.46 (t,  $J = 7.1$  Hz, 3H), 1.09 (d,  $J = 6.1$  Hz, 3H), 1.06 (d,  $J = 6.0$  Hz, 3H).

**<sup>13</sup>C NMR** (101 MHz, Chloroform-d)  $\delta$  166.5, 153.3, 144.0, 143.5, 139.3, 136.0, 135.1, 133.9, 130.4, 128.8, 128.1, 127.8, 127.2, 126.2, 125.1, 125.0, 124.2, 122.1, 121.4, 120.4, 116.3, 106.2, 72.0, 61.3, 30.2, 22.5, 22.2, 19.5, 14.4.

**HRMS** (ESI+) Calcd. For  $C_{29}H_{29}N_2O_3^+$  ( $[M+H]^+$ ): 453.2173, found: 453.2167.

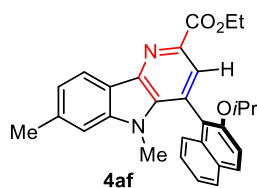

**Ethyl 4-(2-isopropoxynaphthalen-1-yl)-5,7-dimethyl-5H-pyrido[3,2-b]indole-2-carboxylate:** White solid; 92% yield.

**<sup>1</sup>H NMR** (400 MHz, Chloroform-d)  $\delta$  8.51 (d,  $J = 8.0$  Hz, 1H), 8.08 (s, 1H), 7.98 (d,  $J = 9.1$  Hz, 1H), 7.88 (d,  $J = 8.0$  Hz, 1H), 7.43 – 7.28 (m, 3H), 7.21 (d,  $J = 8.5$  Hz, 2H), 7.13 (s, 1H), 4.62 – 4.46 (m, 3H), 3.18 (s, 3H), 2.56 (s, 3H), 1.47 (t,  $J = 7.1$  Hz, 3H), 1.10 (d,  $J = 6.1$  Hz, 3H), 1.06 (d,  $J = 6.0$  Hz, 3H).

**<sup>13</sup>C NMR** (101 MHz, Chloroform-d)  $\delta$  166.4, 153.3, 143.8, 142.9, 139.3, 139.0, 135.3, 133.8, 130.5, 128.8, 128.1, 127.2, 126.6, 125.4, 125.0, 124.2, 122.1, 121.7, 121.2, 119.8, 116.3, 109.2, 72.0, 61.5, 30.1, 22.5, 22.4, 22.2, 14.5.

**HRMS** (ESI+) Calcd. For  $C_{29}H_{29}N_2O_3^+$  ( $[M+H]^+$ ): 453.2173, found: 453.2170.

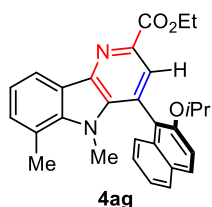

**Ethyl 4-(2-isopropoxynaphthalen-1-yl)-5,6-dimethyl-5H-pyrido[3,2-b]indole-2-carboxylate:** White solid; 89% yield.

**<sup>1</sup>H NMR** (400 MHz, Chloroform-d)  $\delta$  8.51 (d,  $J = 7.2$  Hz, 1H), 8.09 (s, 1H), 7.97 (d,  $J = 9.1$  Hz, 1H), 7.88 (d,  $J = 7.8$  Hz, 1H), 7.43 – 7.19 (m, 6H), 4.67 – 4.45 (m, 3H), 3.49 (s, 3H), 2.71 (s, 3H), 1.46 (t,  $J = 7.1$  Hz, 3H), 1.14 (d,  $J = 6.0$  Hz, 3H), 1.08 (d,  $J = 6.0$  Hz, 3H).

**<sup>13</sup>C NMR** (101 MHz, Chloroform-d)  $\delta$  166.3, 153.1, 143.1, 142.3, 139.6, 136.1, 133.6, 131.9, 130.4, 128.8, 128.1, 127.3, 127.0, 126.1, 125.0, 124.2, 123.3, 121.4, 121.0, 120.7, 120.0, 116.2, 71.9, 61.5, 33.6, 22.5, 22.2, 20.6, 14.5.

**HRMS** (ESI+) Calcd. For C<sub>29</sub>H<sub>29</sub>N<sub>2</sub>O<sub>3</sub><sup>+</sup> ([M+H]<sup>+</sup>): 453.2173, found: 453.2170.

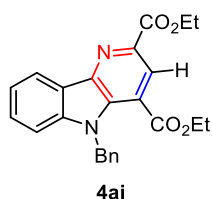

**Diethyl 5-benzyl-5H-pyrido[3,2-b]indole-2,4-dicarboxylate:** It was obtained through the Diels-Alder reaction between the intermediate **III** with methyl propiolate. Yellow solid; 93% yield.

**<sup>1</sup>H NMR** (400 MHz, Chloroform-d)  $\delta$  8.65 – 8.54 (m, 1H), 8.44 (s, 1H), 7.66 – 7.55 (m, 1H), 7.47 (d,  $J = 8.3$  Hz, 1H), 7.45 – 7.39 (m, 1H), 7.23 – 7.16 (m, 3H), 6.95 – 6.88 (m, 2H), 5.82 (s, 2H), 4.54 (q,  $J = 7.1$  Hz, 2H), 4.25 (q,  $J = 7.2$  Hz, 2H), 1.50 (t,  $J = 7.1$  Hz, 3H), 1.21 (t,  $J = 7.2$  Hz, 3H).

**<sup>13</sup>C NMR** (101 MHz, Chloroform-d)  $\delta$  165.9, 165.5, 145.3, 144.0, 139.4, 136.4, 131.9, 129.6, 128.8, 127.5, 126.1, 122.2, 122.2, 122.1, 121.9, 121.7, 110.1, 62.3, 61.9, 48.6, 14.5, 13.9.

**HRMS** (ESI+) Calcd. For C<sub>24</sub>H<sub>23</sub>N<sub>2</sub>O<sub>4</sub><sup>+</sup> ([M+H]<sup>+</sup>): 403.1651, found: 403.1641.

#### 4. General procedure for synthesis of intermediate III

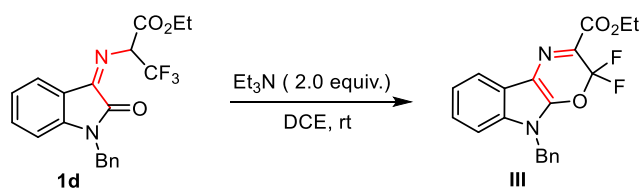

In a 25 mL nitrogen-filled dry Schlenk tube, isatin-activated ketoimine ester **1d** (0.2 mmol), Et<sub>3</sub>N (0.4 mmol) and degassed DCE (2 mL) were added. The reaction was stirred for 12 h at room temperature until starting material was consumed (monitored by TLC). The reaction mixture was concentrated via rotary evaporation under reduced pressure, and then purified by flash chromatography on silica gel (PE/EA = 10:1) to give the compound **III**.

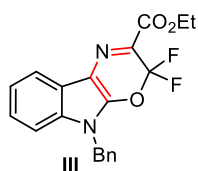

**Ethyl 5-benzyl-3,3-difluoro-3,5-dihydro-[1,4]oxazino[2,3-b]indole-2-carboxylate:** Green solid; 99% yield.

**<sup>1</sup>H NMR** (400 MHz, Chloroform-*d*)  $\delta$  7.95 (d,  $J = 7.7$  Hz, 1H), 7.37 – 7.27 (m, 4H), 7.26 – 7.20 (m, 4H), 5.31 (s, 2H), 4.47 (q,  $J = 7.1$  Hz, 2H), 1.44 (t,  $J = 7.1$  Hz, 3H).

**<sup>13</sup>C NMR** (101 MHz, Chloroform-*d*)  $\delta$  161.0, 140.3, 134.5, 132.5, 129.2, 128.5 (t,  $J = 29.8$  Hz), 128.4, 127.1, 123.5, 123.2, 121.8, 118.4, 117.7 (t,  $J = 269.7$  Hz), 110.6, 107.6, 62.1, 45.8, 14.3.

**<sup>19</sup>F NMR** (376 MHz, Chloroform-*d*)  $\delta$  -47.10.

**HRMS** (ESI+) Calcd. For C<sub>20</sub>H<sub>17</sub>F<sub>2</sub>N<sub>2</sub>O<sub>3</sub><sup>+</sup> ([M+H]<sup>+</sup>): 371.1202, found: 371.1196.

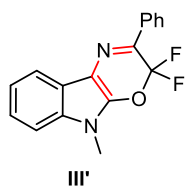

**3,3-difluoro-5-methyl-2-phenyl-3,5-dihydro-[1,4]oxazino[2,3-b]indole:** It was obtained through using ethyl (*Z*)-2-((1-methyl-2-oxoindolin-3-ylidene)amino)-2-phenylacetate as the substrate. Yellow solid; 75% yield.

**<sup>1</sup>H NMR** (400 MHz, Chloroform-*d*)  $\delta$  8.06 – 8.00 (m, 2H), 7.91 – 7.85 (m, 1H), 7.48 – 7.41



(m, 3H), 7.30 – 7.21 (m, 3H), 3.68 (s, 3H).

$^{13}\text{C}$  NMR (101 MHz, Chloroform-d)  $\delta$  139.5 (t,  $J$  = 29.4 Hz), 138.3, 133.1, 132.1, 129.9, 128.6, 127.4, 122.0, 121.8, 118.3 (t,  $J$  = 267.8 Hz), 117.5, 109.4, 106.5, 27.81.

$^{19}\text{F}$  NMR (376 MHz, Chloroform-d)  $\delta$  -49.70.

HRMS (ESI+) Calcd. For  $\text{C}_{17}\text{H}_{13}\text{F}_2\text{N}_2\text{O}^+$  ( $[\text{M}+\text{H}]^+$ ): 299.0990, found: 299.0981.

## 5. Synthetic application

### (a) General procedure for synthesis of Py-box-type ligand **6**

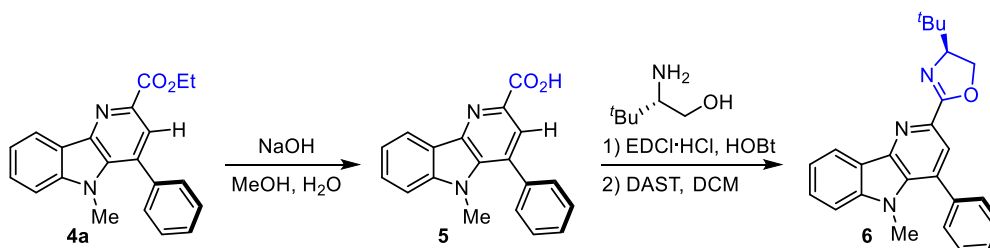

Compound **6** was synthesized according to reported procedure.<sup>4</sup>

**Step 1**, To a stirred suspension of **4a** (1 mmol) was added methanol (10 mL). Aqueous sodium hydroxide solution (3 mL, 1 M) was added dropwise at 0 °C. The heterogeneous mixture was immersed in a preheated oil bath (50 °C) and was stirred until the full consumption of the starting material was detected by thin layer chromatography (TLC). The mixture was concentrated under vacuum to remove methanol, and was adjusted to pH 6-7 with hydrochloric acid, from which the acid (intermediate **5**) was precipitated, the heterogeneous mixture was filtered, and the intermediate **5** was collected and dried as a white solid in 66% yield.

**Step 2**, To a dried Schlenk flask charged with **5** (1 mmol) and the chiral amino alcohol (1 mmol), was added anhydrous dichloromethane (5 mL) for dissolution. Hydroxybenzotriazole (HOBt) (175 mg, 1.3 mmol) and *N*-(3-(dimethyl amino)propyl)-*N'*-ethylcarbodiimide hydrochloride (EDCI·HCl) (0.25 g, 1.3 mmol) were then added while the reaction flask was in an ice bath. The mixture was allowed to gradually warm to room temperature, and it was stirred overnight until full consumption of the acid detected by TLC. The mixture was quenched by the addition of a saturated aqueous solution of  $\text{NaHCO}_3$  (20 mL) and separated. The water phase was extracted with dichloromethane (10 mL  $\times$  3), and the combined organic phase was sequentially washed with water (10 mL  $\times$  2) and saturated aqueous NaCl (10 mL), dried over anhydrous sodium sulfate, and concentrated under vacuum. Purification by silica gel column

chromatography with hexane/EtOAc (2:1, v/v) as the eluent gave the amide intermediate. To a Schlenk tube charged the amide intermediate (1 mmol) was added anhydrous DCM (5.0 mL) under N<sub>2</sub> atmosphere. Diethylaminosulfur trifluoride (DAST) (160 mg, 1mmol) was added dropwise at -78 °C. The reaction mixture was stirred at -78 °C until the full consumption of the starting material was detected by TLC. The mixture was quenched by the addition of a saturated aqueous solution of NaHCO<sub>3</sub> (10 mL) and separated. The water phase was extracted with dichloromethane (10 mL × 3), and the combined organic phase was sequentially washed with water (10 mL × 2) and saturated aqueous NaCl (10 mL), dried over anhydrous sodium sulfate, and concentrated under vacuum, which was purified by silica gel column chromatography with PE/EA (2:1, v/v) as the eluent to give the chiral ligand **6** as a white solid in 52% yield.

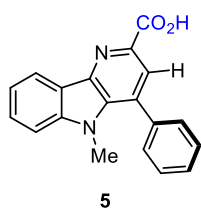

**5-methyl-4-phenyl-5H-pyrido[3,2-b]indole-2-carboxylic acid:** White solid; 66% yield.

<sup>1</sup>H NMR (400 MHz, Chloroform-d) δ 8.41 (d, *J* = 7.8 Hz, 1H), 8.19 (s, 1H), 7.72 – 7.63 (m, 1H), 7.58 – 7.38 (m, 7H), 3.49 (s, 3H).

<sup>13</sup>C NMR (101 MHz, Chloroform-d) δ 165.3, 143.9, 141.3, 137.3, 136.7, 134.4, 133.8, 129.4, 129.3, 128.9, 128.5, 122.4, 121.3, 121.3, 121.05, 109.7, 32.7.

HRMS (ESI+) Calcd. For C<sub>19</sub>H<sub>15</sub>N<sub>2</sub>O<sub>2</sub><sup>+</sup> ([M+H]<sup>+</sup>): 303.1128, found: 303.1126.

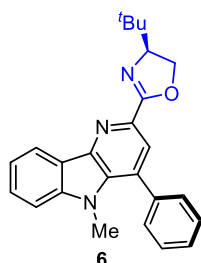

**(S)-4-(tert-butyl)-2-(5-methyl-4-phenyl-5H-pyrido[3,2-b]indol-2-yl)-4,5-dihydrooxazole:**

White solid; 52% yield.

<sup>1</sup>H NMR (400 MHz, Chloroform-d) δ 8.57 (d, *J* = 7.8 Hz, 1H), 8.14 (s, 1H), 7.61 – 7.55 (m, 1H), 7.55 – 7.46 (m, 5H), 7.42 – 7.32 (m, 2H), 4.55 (t, *J* = 9.4 Hz, 1H), 4.40 (t, *J* = 8.4 Hz, 1H),

4.16 (dd,  $J = 10.1, 8.1$  Hz, 1H), 3.44 (s, 3H), 1.00 (s, 9H).

$^{13}\text{C}$  NMR (101 MHz, Chloroform- $d$ )  $\delta$  163.5, 143.3, 142.6, 138.3, 137.4, 132.9, 132.6, 129.6, 128.5, 128.3, 128.3, 123.1, 122.0, 121.9, 120.4, 109.1, 76.3, 69.4, 34.1, 32.5, 26.0.

HRMS (ESI+) Calcd. For  $\text{C}_{25}\text{H}_{26}\text{N}_3\text{O}^+$  ( $[\text{M}+\text{H}]^+$ ): 384.2070, found: 384.2063.

(b) General procedure for synthesis of compound **9**

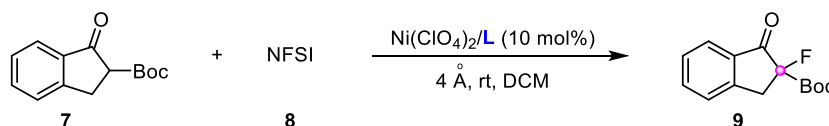

Compound **9** was synthesized according to reported procedure.<sup>5</sup> In a 25 mL dry Schlenk tube, ligand **6** (or *t*Bu-Pyrbox) (0.02 mmol),  $\text{Ni}(\text{ClO}_4)_2$  (0.02 mmol), 50 mg 4 Å MS and DCM (1 mL) were added and stirred for 1 h at room temperature. Indanone **7** and NFSI was then added, and the reaction was stirred until starting material was consumed (monitored by TLC). The reaction mixture was concentrated via rotary evaporation under reduced pressure, and then purified by flash chromatography on silica gel (PE/EA = 10:1) to give the product **9** as a colorless oil in 84% yield and 60% ee (10% ee using *t*Bu-Pybox as the ligand).

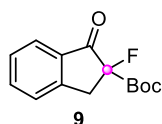

**Tert-butyl 2-fluoro-1-oxo-2,3-dihydro-1H-indene-2-carboxylate:** Colorless oil; 84% yield and 60% ee (91% yield and 10% ee if *t*Bu-Pybox was used);  $[\alpha]_{\text{D}}^{25} = -1.8$  ( $c$  0.45,  $\text{CHCl}_3$ ).

HPLC conditions: Chiralpak AD-H, isopropanol/hexane = 10:90, flow: 1.0 mL/min,  $\lambda = 254$  nm,  $t_{(\text{minor})} = 5.8$  min,  $t_{(\text{major})} = 6.3$  min.

$^1\text{H}$  NMR (400 MHz, Chloroform- $d$ )  $\delta$  7.83 (d,  $J = 7.7$  Hz, 1H), 7.75 – 7.62 (m, 1H), 7.54 – 7.40 (m, 2H), 3.73 (dd,  $J = 17.5, 10.8$  Hz, 1H), 3.40 (dd,  $J = 22.9, 17.5$  Hz, 1H), 1.43 (s, 9H).

$^{13}\text{C}$  NMR (101 MHz, Chloroform- $d$ )  $\delta$  195.8 (d,  $J = 18.4$  Hz), 166.3 (d,  $J = 27.3$  Hz), 151.0 (d,  $J = 4.2$  Hz), 136.5, 133.6, 128.5, 126.5, 125.5, 94.4 (d,  $J = 201.7$  Hz), 84.2, 38.3 (d,  $J = 24.1$  Hz), 27.8.

$^{19}\text{F}$  NMR (376 MHz, Chloroform- $d$ )  $\delta$  -163.94 – 164.03 (m).

HRMS (ESI+) Calcd. For  $\text{C}_{14}\text{H}_{15}\text{FO}_3\text{Na}^+$  ( $[\text{M}+\text{Na}]^+$ ): 273.0897, found: 273.0893.

## 6. Photophysical data

### a) Absorption and emission spectra.

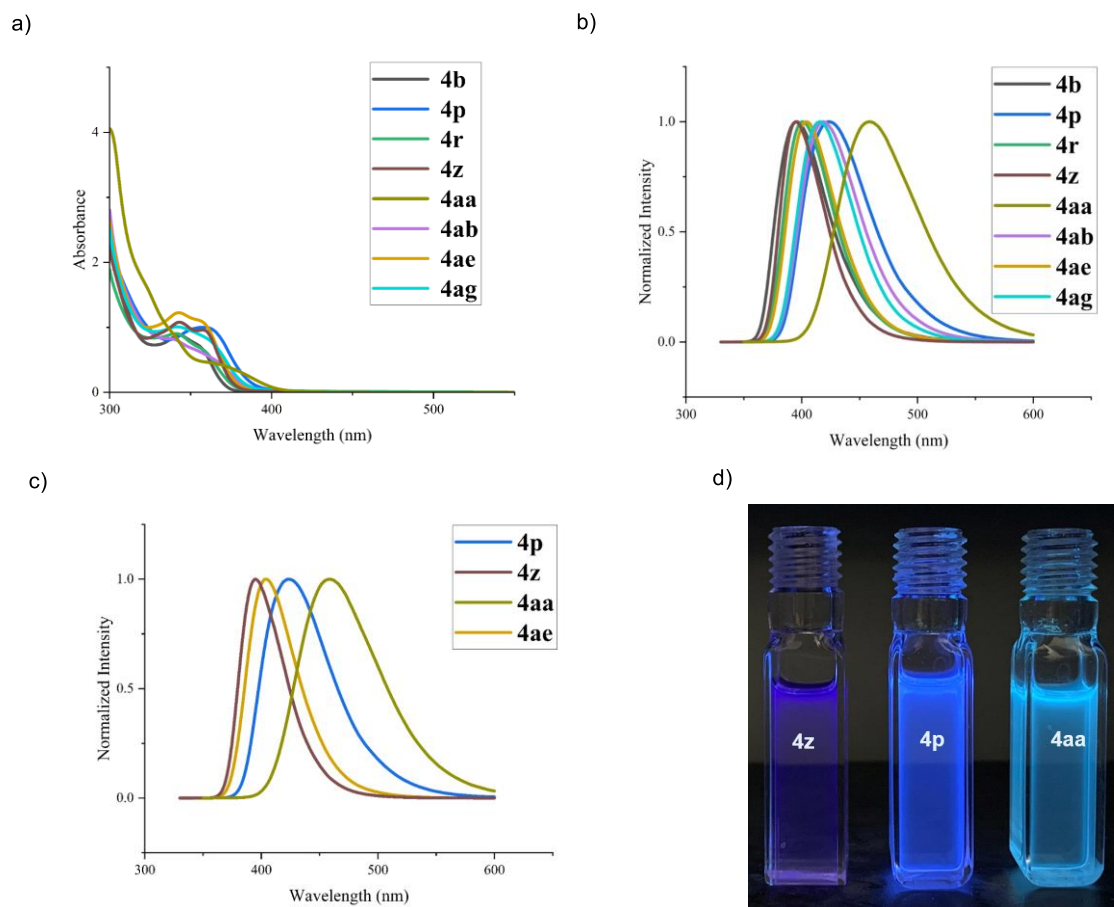

**Figure S1.** Compounds **4** was dissolved in DCM and diluted to  $5 \times 10^{-5}$  M. a) UV-Vis absorption spectra (slits: 0.5 nm). b) Fluorescence spectra ( $\lambda_{\text{ex}} = 365$  nm, slits: 1 nm). c) Fluorescence spectra of **4p**, **4z**, **4aa** and **4ae**. d) Photographs of  $\delta$ -carboline derivatives under irradiation with UV light ( $\lambda_{\text{ex}} = 365$  nm) in DCM.

### b) Emission spectra of metal ion recognition

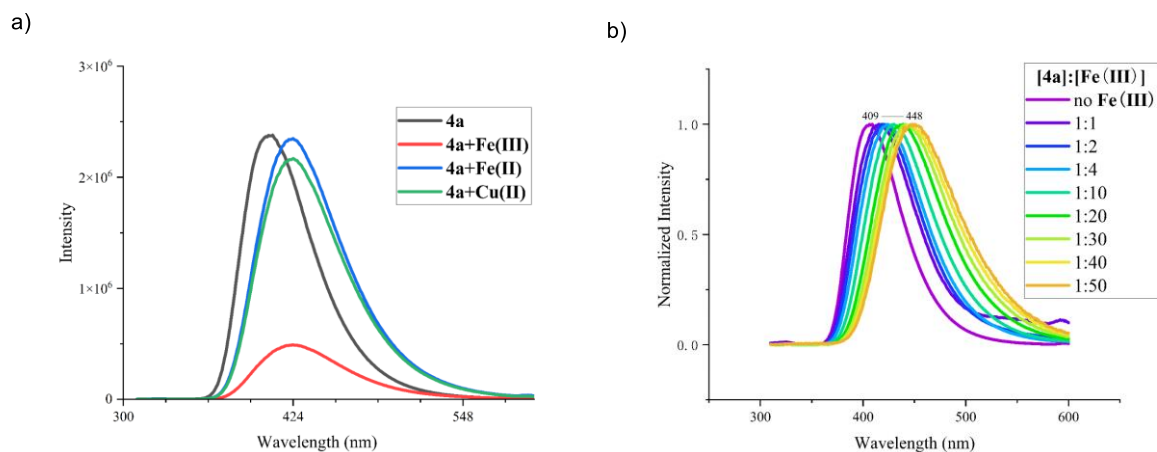

**Figure S2.** Fluorescence spectra ( $\lambda_{\text{ex}} = 365$  nm, slits: 1 nm). a) The samples were prepared by mixing **4a** (50

$\mu\text{L}$ ,  $5 \times 10^{-3}$  M in  $\text{CH}_3\text{CN}$ ) and metal precursors ( $200 \mu\text{L}$ ,  $5 \times 10^{-3}$  M in  $\text{CH}_3\text{CN}$ ) and diluted to 5 mL at 25 °C. b) The samples were prepared by mixing 1, 2, 4, 10, 20, 30, 40 and 50 equiv. of  $\text{Fe}(\text{OTf})_3$  with **4a** ( $50 \mu\text{L}$ ,  $5 \times 10^{-3}$  M in  $\text{CH}_3\text{CN}$ ) and diluted to 5 mL.

## 7. X-ray Structure of **4a** and **III**

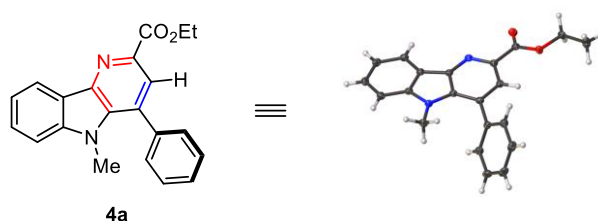

**Figure S1.** X-ray Structure of **4a**.

To a 10 mL oven-dried glass sample bottle was added 50 mg pure **4a** with DCM to get clear solution, then petroleum ether was slowly added to become muddy. The mixture solution was sealed with filter paper to slowly grow crystals at room temperature. Crystal data for **4a**:  $\text{C}_{21}\text{H}_{18}\text{N}_2\text{O}_2$ ,  $M_r = 330.37$ ,  $T = 100$  K, orthorhombic, space group P -1,  $a = 8.0404(2)$ ,  $b = 9.2472(3)$ ,  $c = 11.6115(4)$  Å,  $V = 812.47(5)$  Å<sup>3</sup>,  $Z = 2$ . CCDC 2163875 contains the supplementary crystallographic data for this paper. These data can be obtained free of charge via [www.ccdc.cam.ac.uk/conts/retrieving.html](http://www.ccdc.cam.ac.uk/conts/retrieving.html).

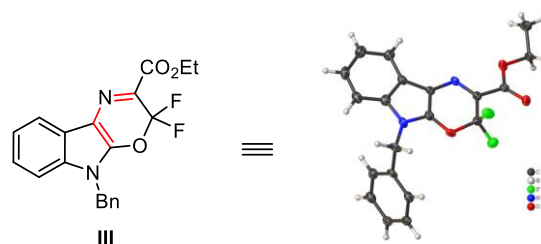

**Figure S2.** X-ray Structure of **III**.

To a 10 mL oven-dried glass sample bottle was added 50 mg pure **III** with DCM to get clear solution, then petroleum ether was slowly added to become muddy. The mixture solution was sealed with filter paper to slowly grow crystals at room temperature. Crystal data for **III**:  $\text{C}_{20}\text{H}_{16}\text{F}_2\text{N}_2\text{O}_3$ ,  $M_r = 370.35$ ,  $T = 100$  K, orthorhombic, space group P -1,  $a = 108.139(6)$ ,  $b = 90.02(2)$ ,  $c = 107.606(2)$  Å,  $V = 3403.1(4)$  Å<sup>3</sup>,  $Z = 8$ . CCDC 2163876 contains the

supplementary crystallographic data for this paper. These data can be obtained free of charge via [www.ccdc.cam.ac.uk/conts/retrieving.html](http://www.ccdc.cam.ac.uk/conts/retrieving.html).

## 8. Reference

1. N. Kaila, K. Janz, A. Huang, A. Moretto, S. DeBernardo, P. W. Bedard, S. Tam, V. Clerin, J. C. Keith, D. H. H. Tsao, N. Sushkova, G. D. Shaw, R. T. Camphausen, R. G. Schaub, Q. Wang, *J. Med. Chem.* **2007**, *50*, 40-64.
2. Q. Ni, X. Wang, D. Zeng, Q. Wu, X. Song, *Org. Lett.* **2021**, *23*, 2273-2278.
3. X.-S. Sun, X.-H. Wang, H.-Y. Tao, L. Wei, C.-J. Wang, *Chem. Sci.* **2020**, *11*, 10984-10990.
4. J. Lai, W. Li, S. Wei, S. Li, *Org. Chem. Front.* **2020**, *7*, 2263-2268.
5. K. Shibatomi, Y. Tsuzuki, S.-i. Nakata, Y. Sumikawa, S. Iwasa, *Synlett.* **2007**, *2007*, 551.

## 9. NMR and HPLC spectra

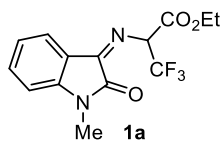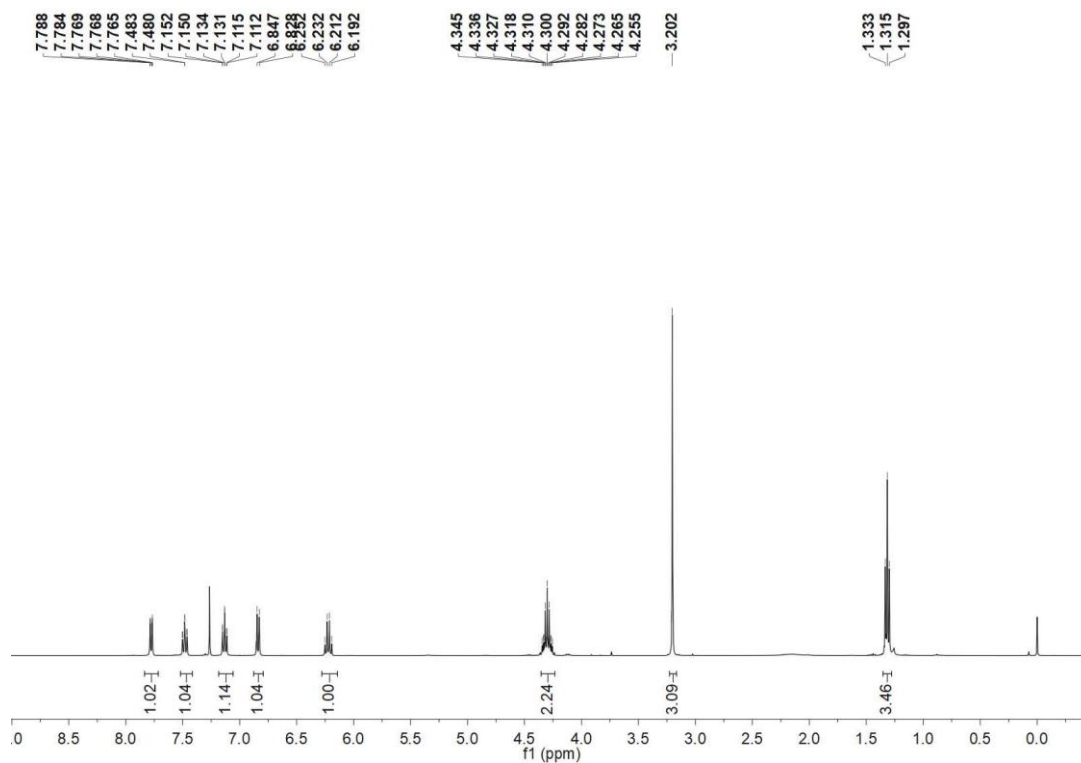

<sup>1</sup>H NMR (400 MHz, Chloroform-d)

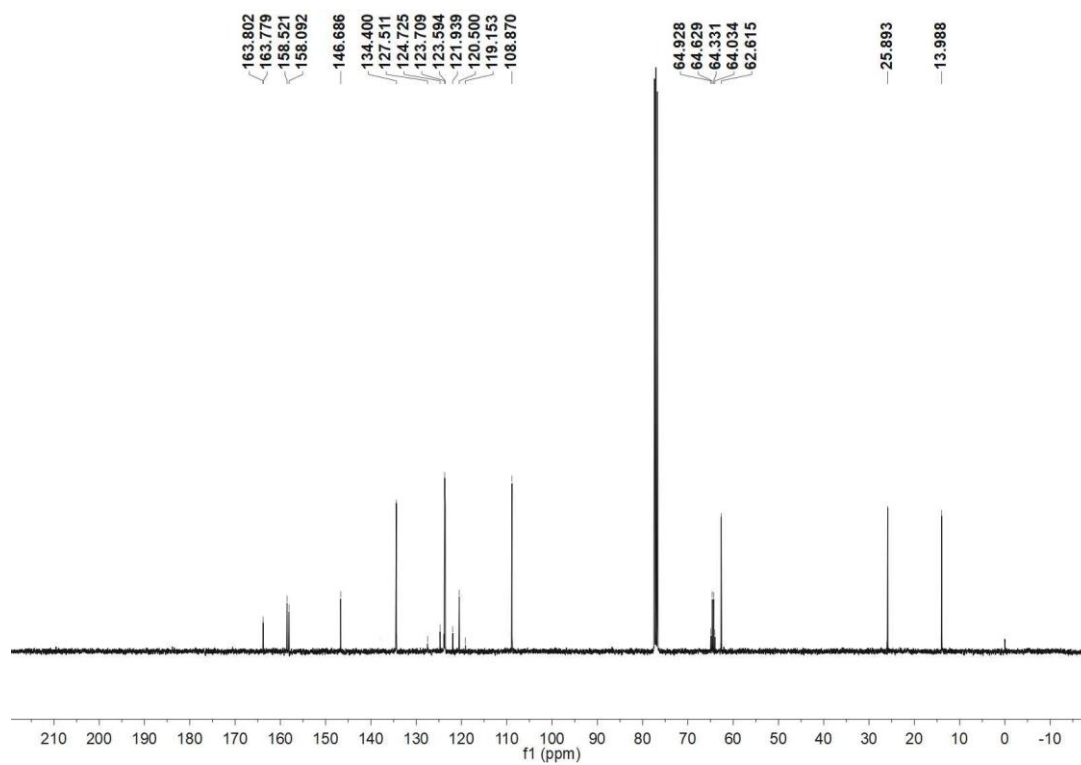

<sup>13</sup>C NMR (101 MHz, Chloroform-d)



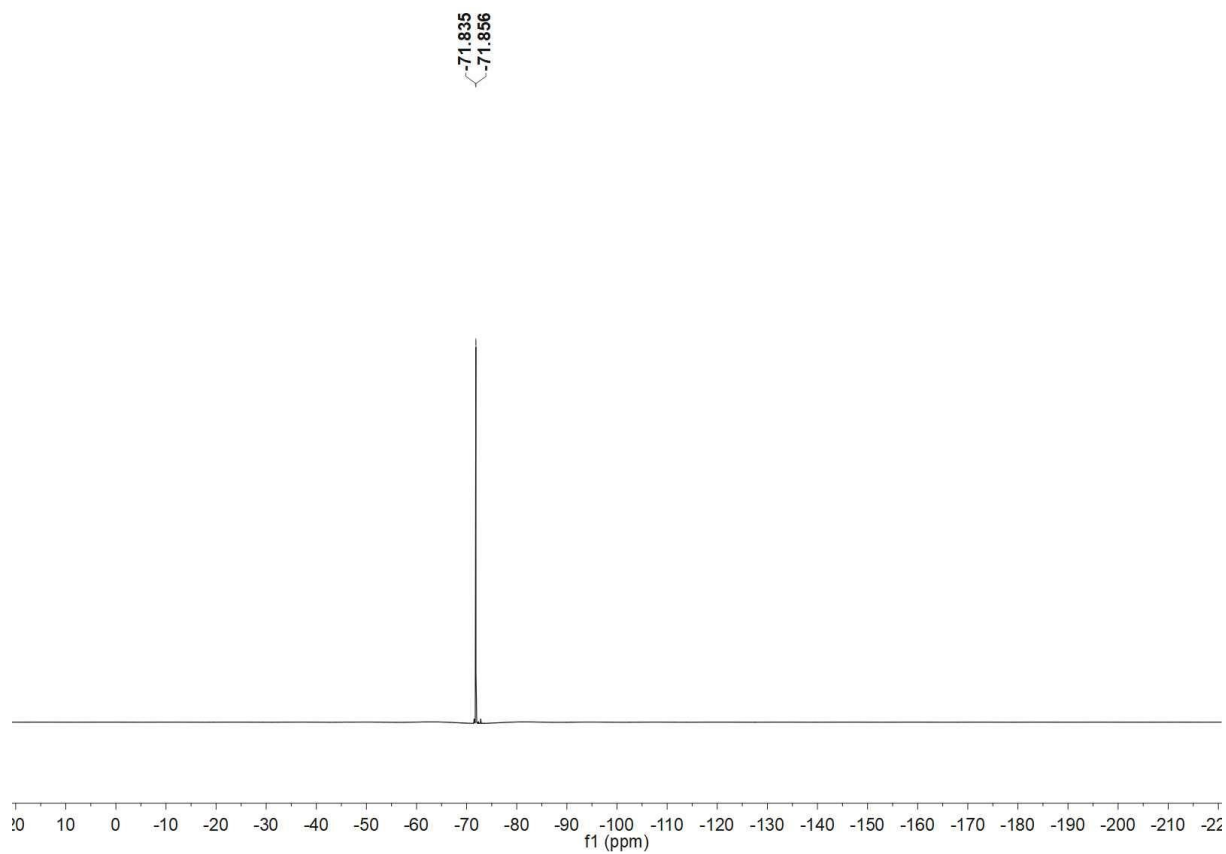

$^{19}\text{F}$  NMR (376 MHz, Chloroform-d)



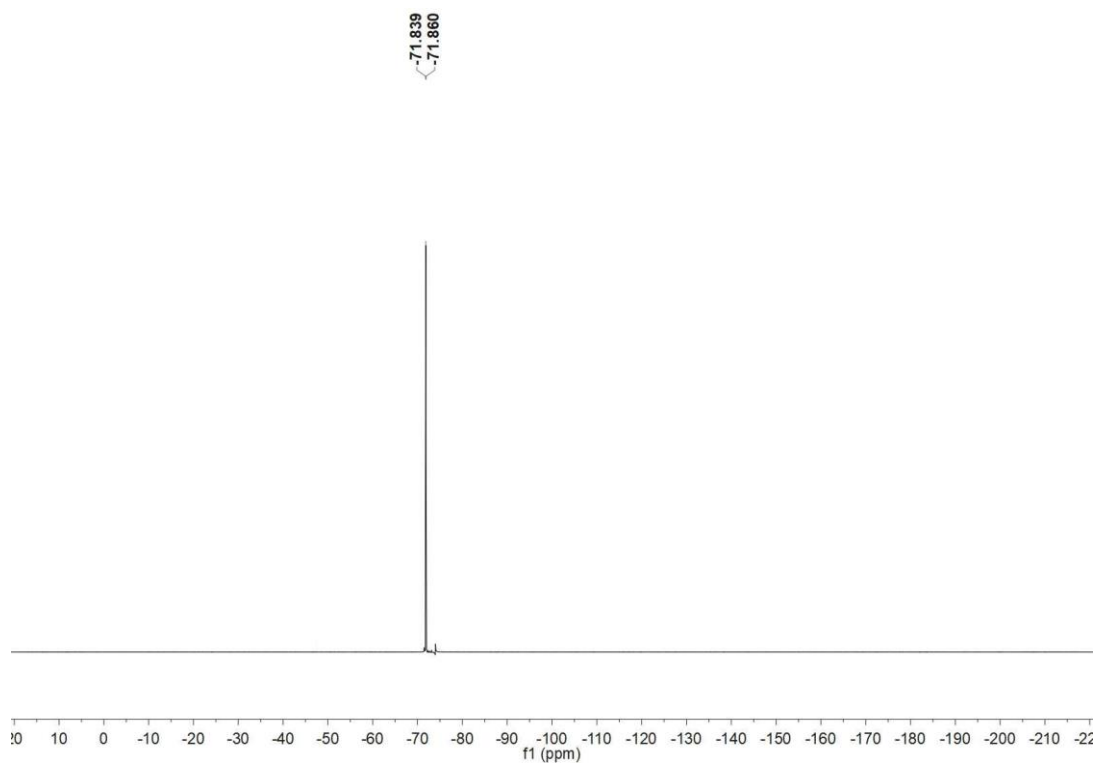

$^{19}\text{F}$  NMR (376 MHz, Chloroform-d)

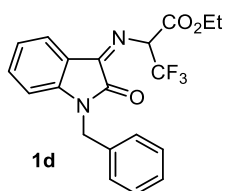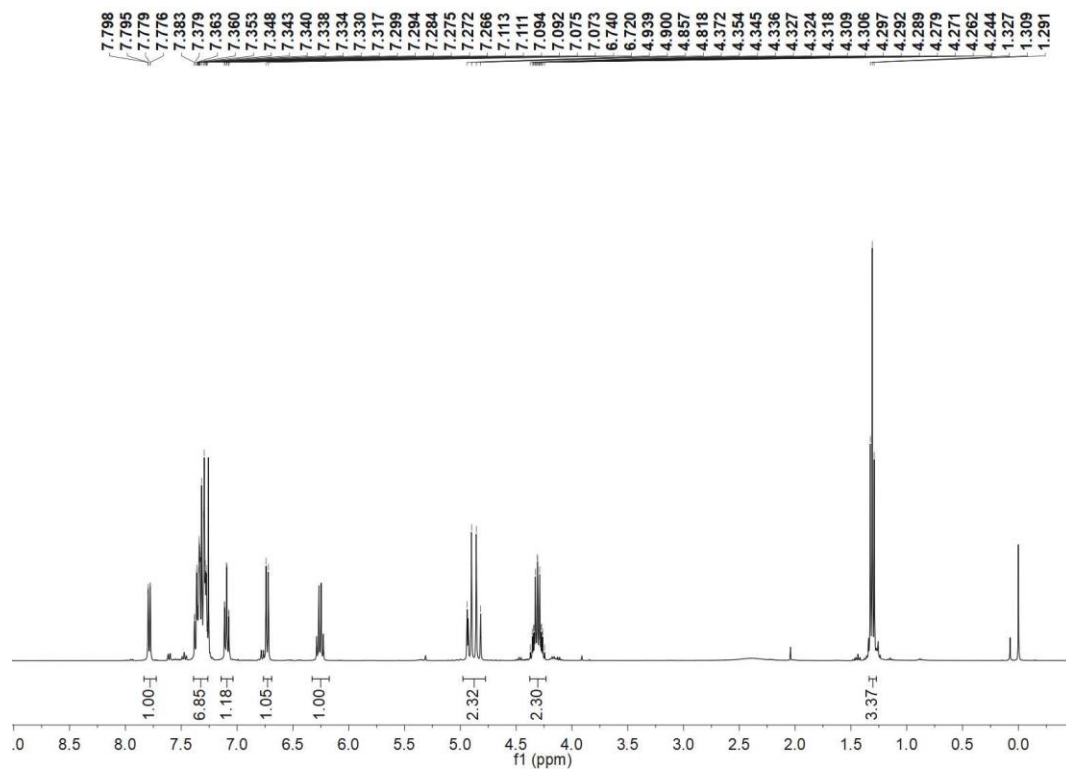

<sup>1</sup>H NMR (400 MHz, Chloroform-d)

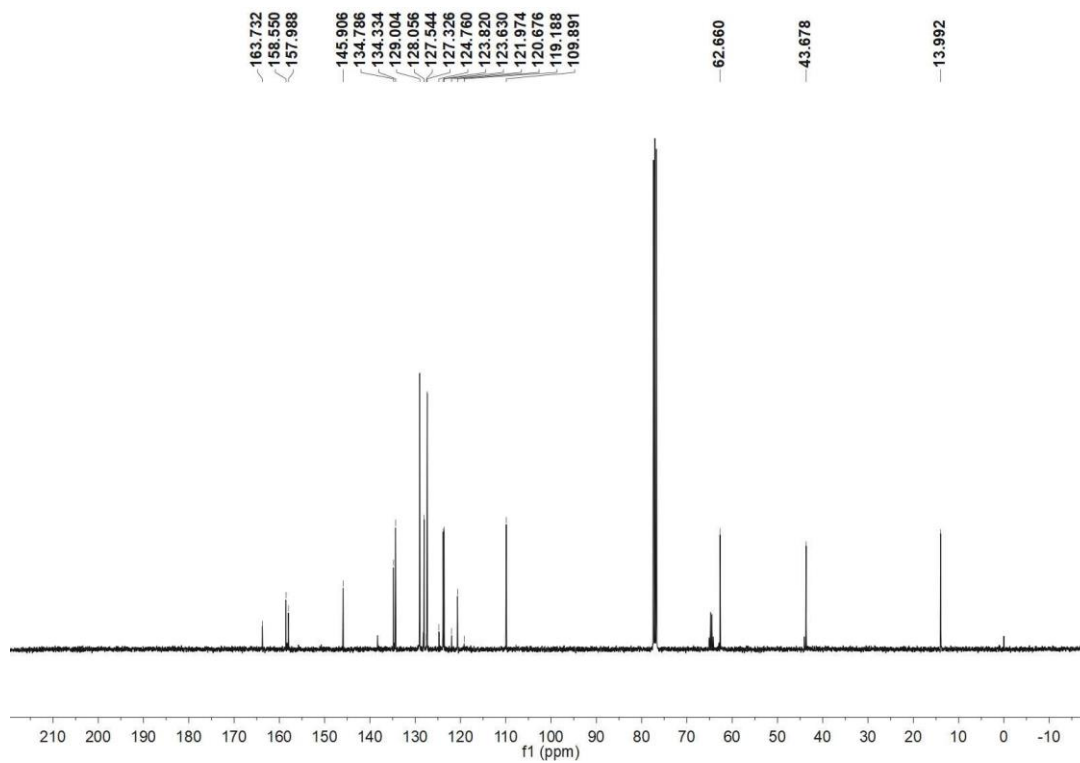

<sup>13</sup>C NMR (101 MHz, Chloroform-d)

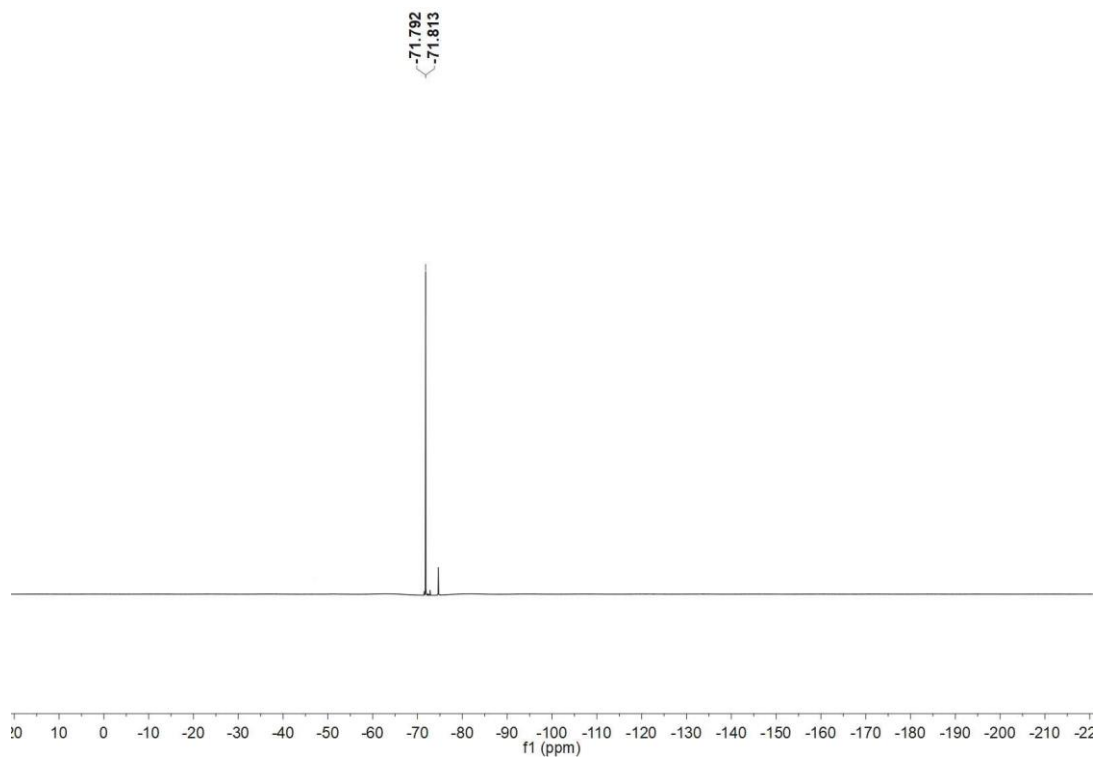

$^{19}\text{F}$  NMR (376 MHz, Chloroform-d)

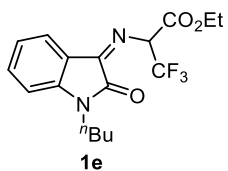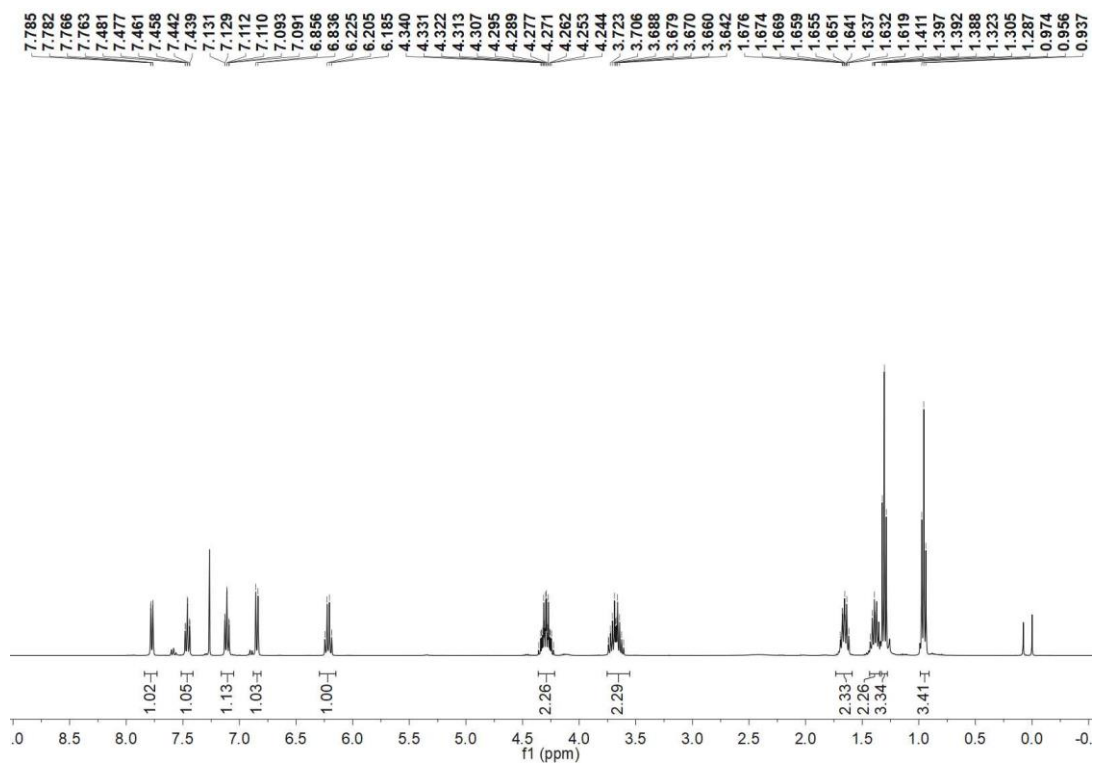

<sup>1</sup>H NMR (400 MHz, Chloroform-d)

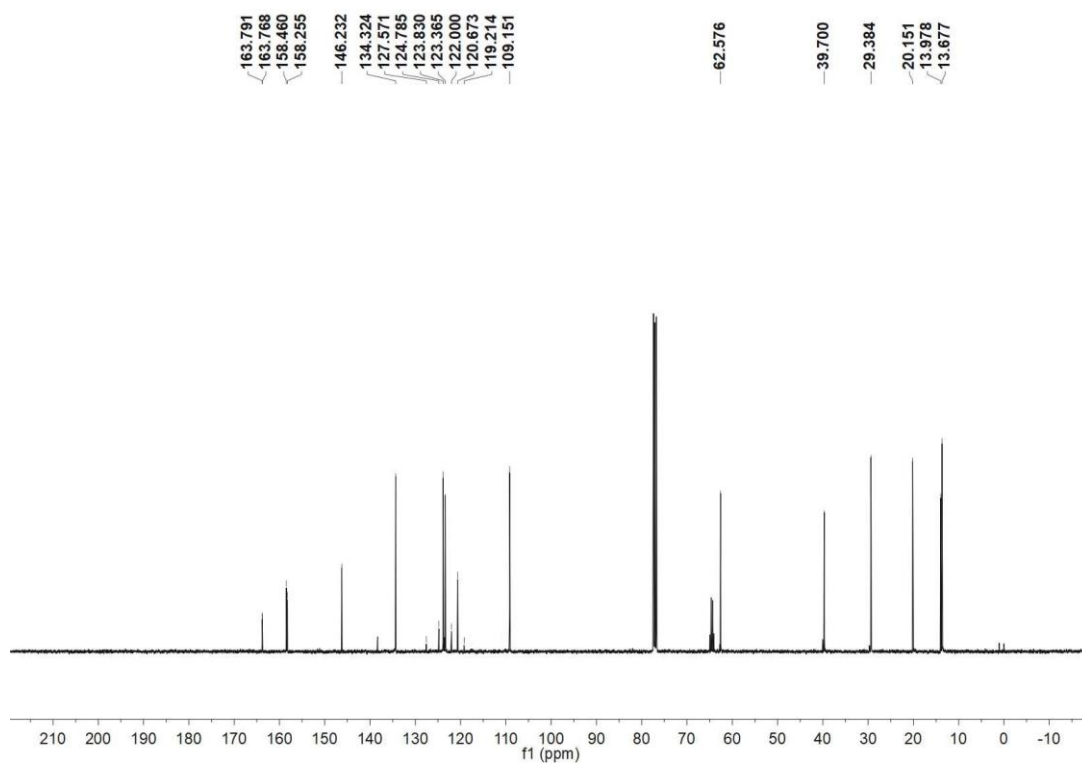

<sup>13</sup>C NMR (101 MHz, Chloroform-d)

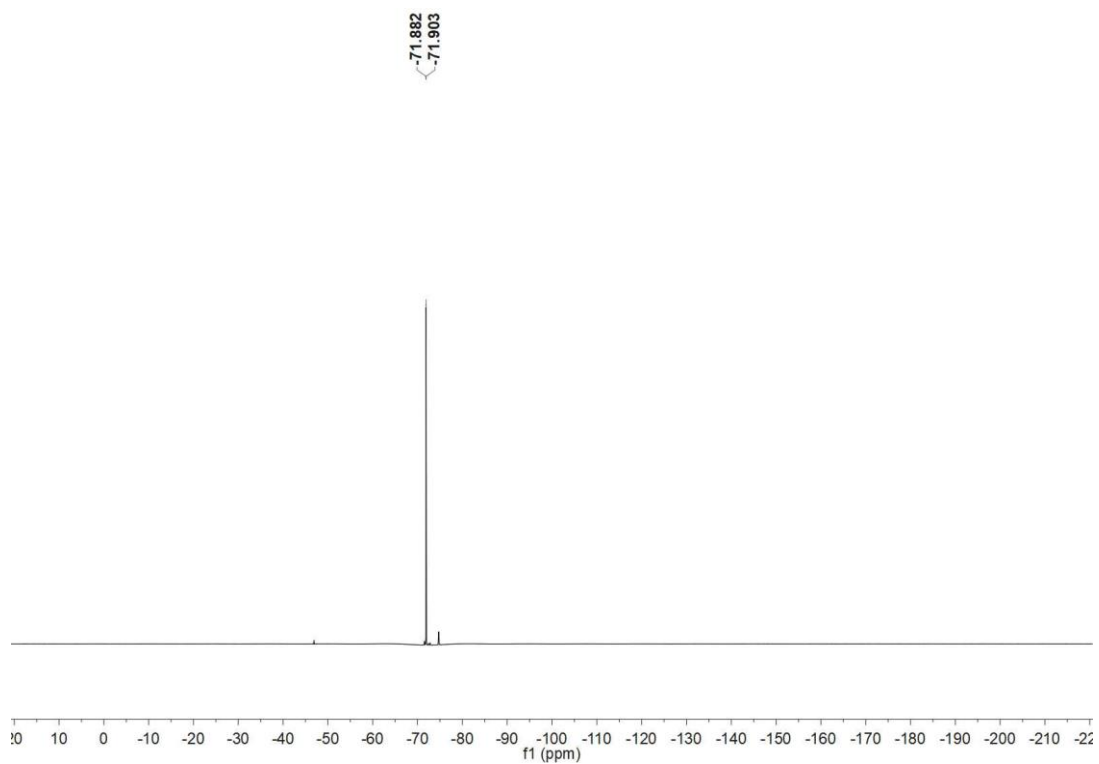

$^{19}\text{F}$  NMR (376 MHz, Chloroform-d)

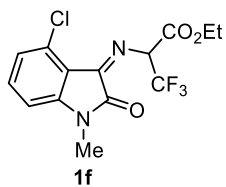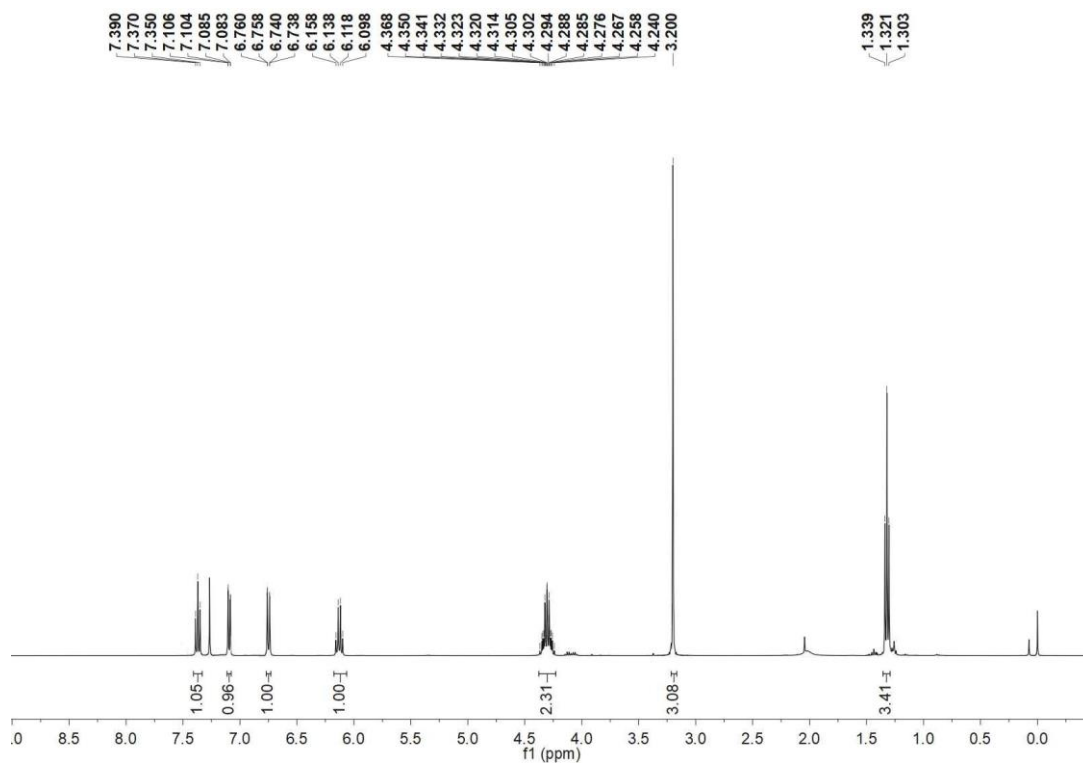

<sup>1</sup>H NMR (400 MHz, Chloroform-d)

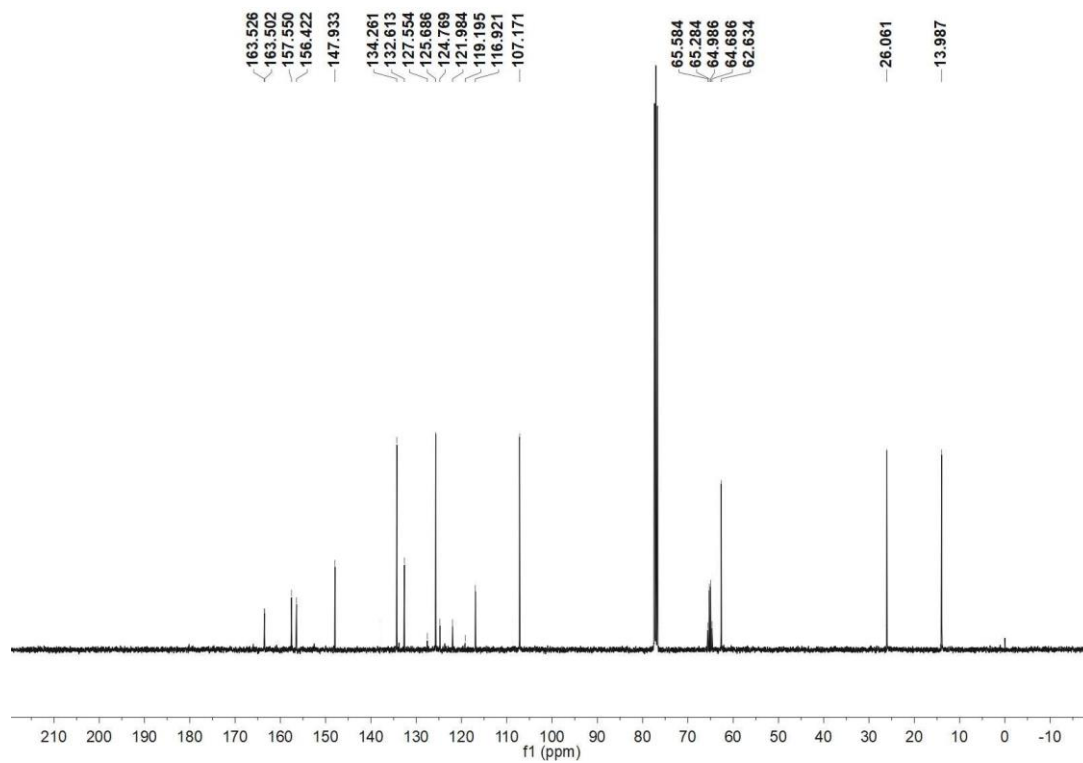

<sup>13</sup>C NMR (101 MHz, Chloroform-d)



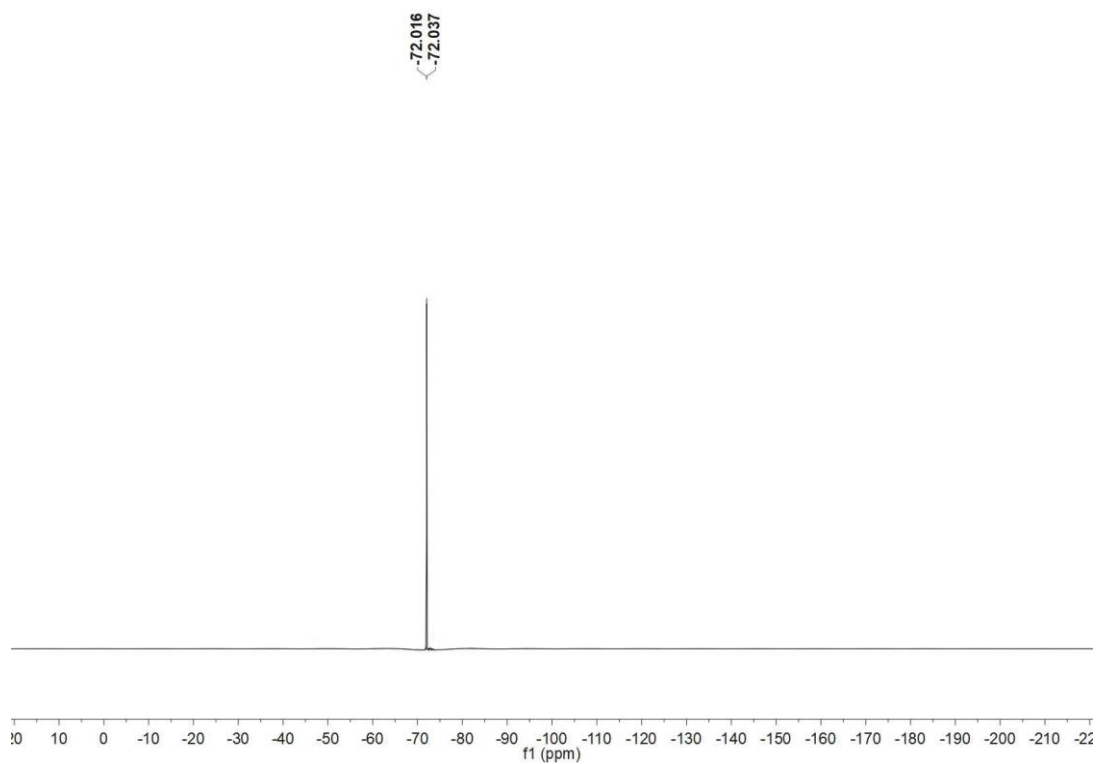

$^{19}\text{F}$  NMR (376 MHz, Chloroform-d)

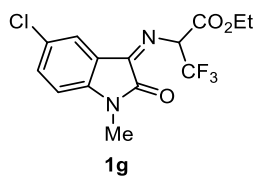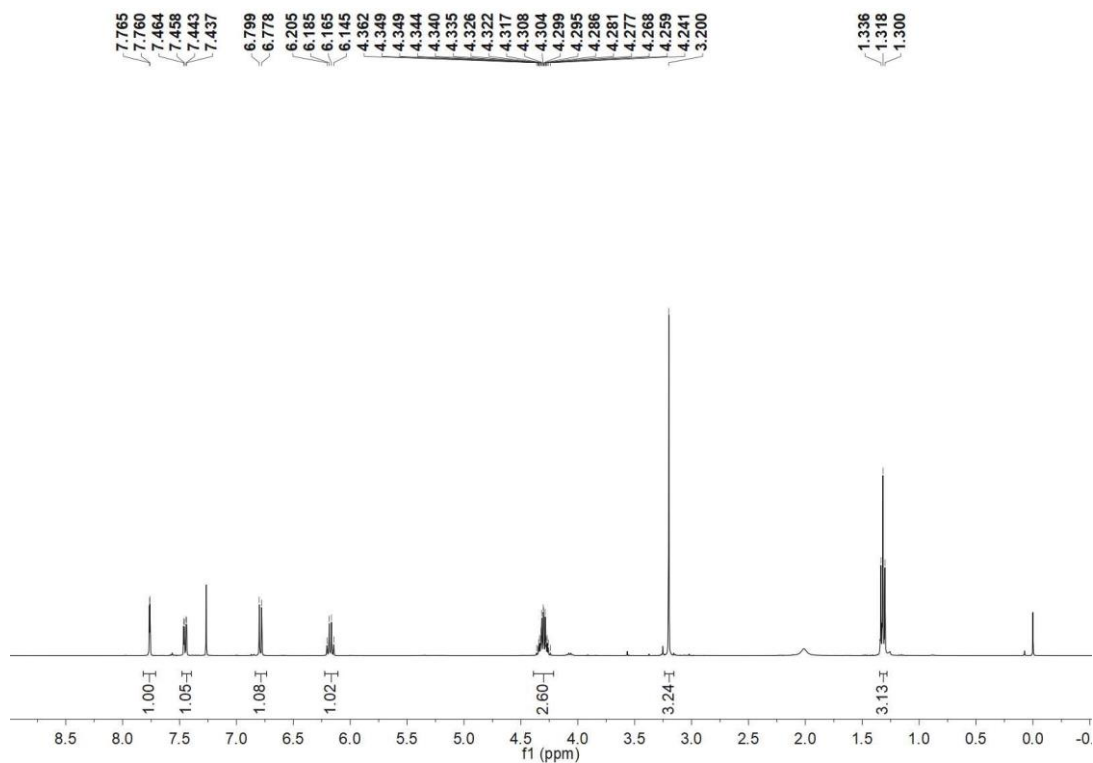

<sup>1</sup>H NMR (400 MHz, Chloroform-d)

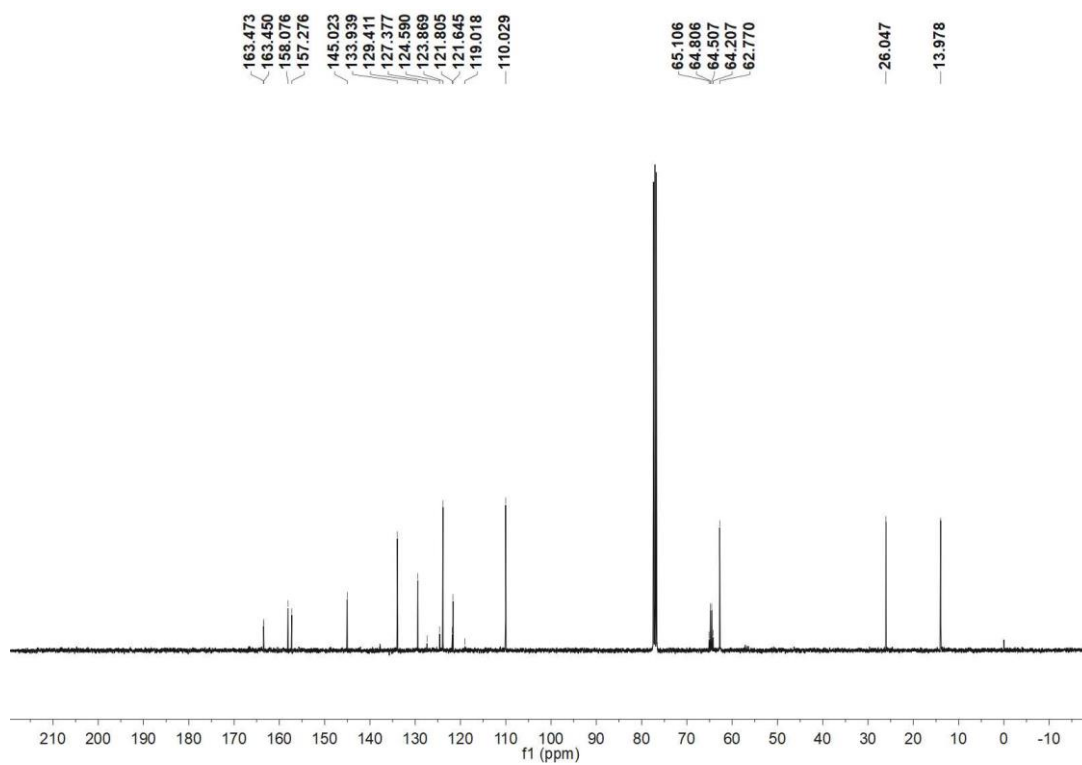

<sup>13</sup>C NMR (101 MHz, Chloroform-d)

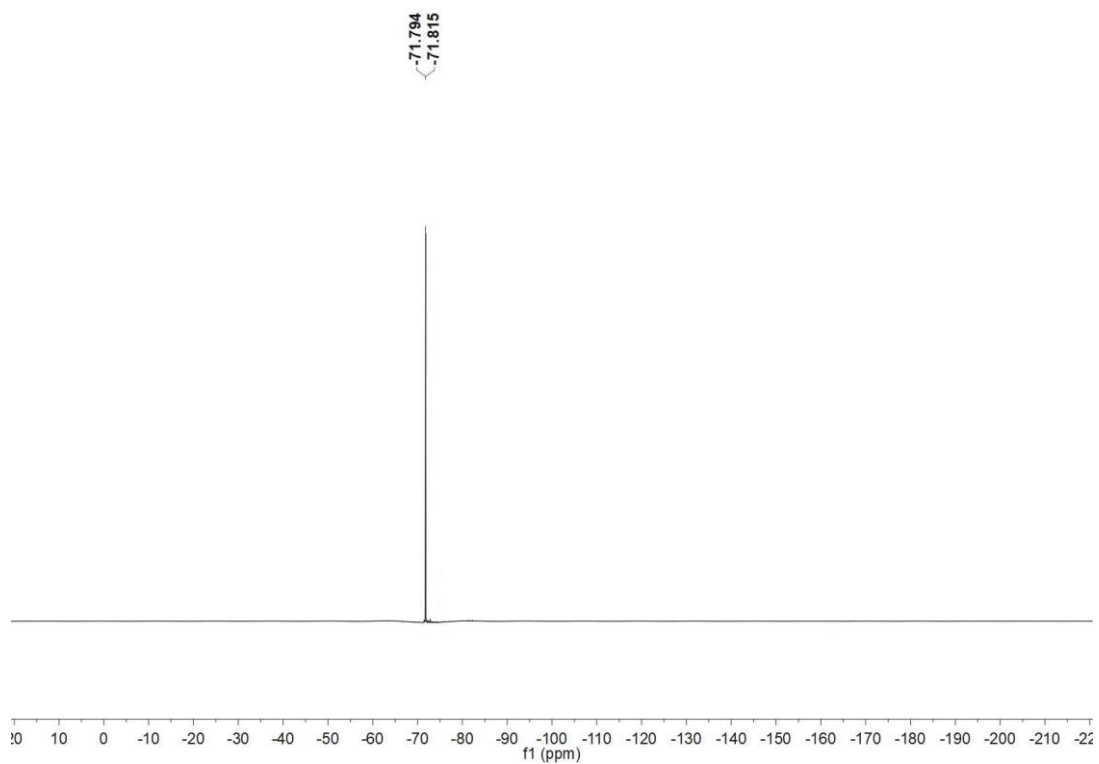

$^{19}\text{F}$  NMR (376 MHz, Chloroform-d)

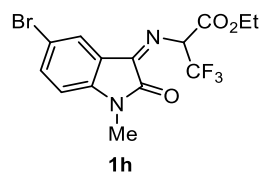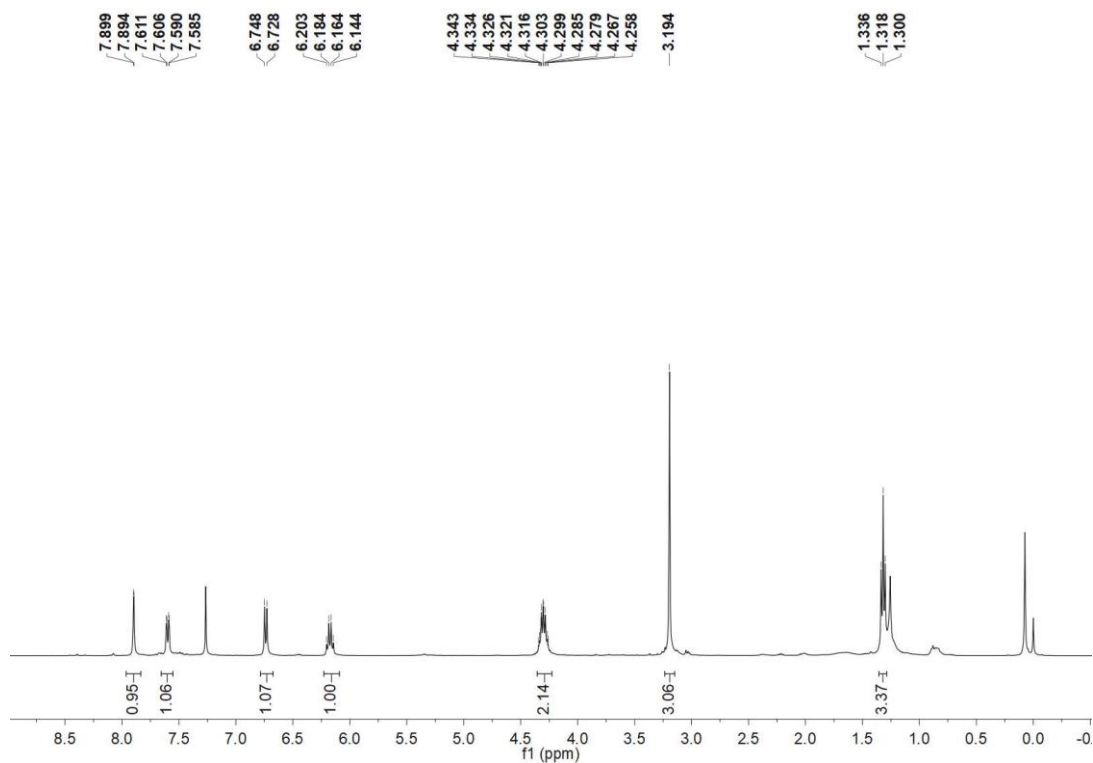

**<sup>1</sup>H NMR (400 MHz, Chloroform-d)**

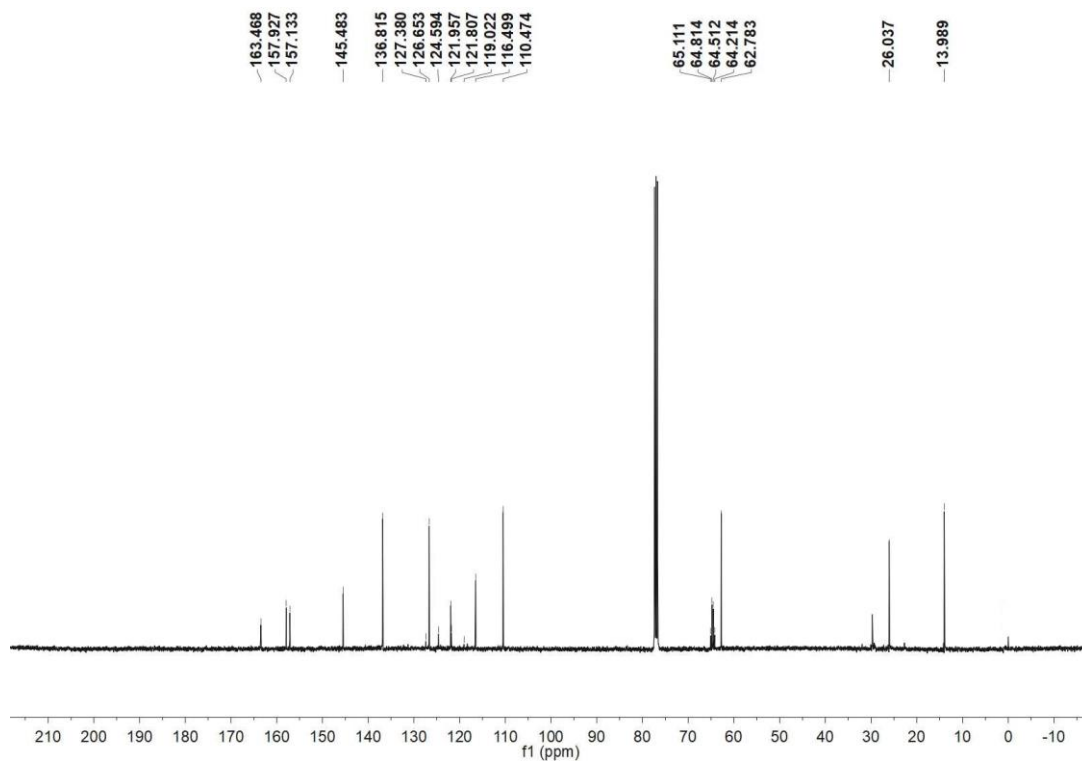

**<sup>13</sup>C NMR (101 MHz, Chloroform-d)**

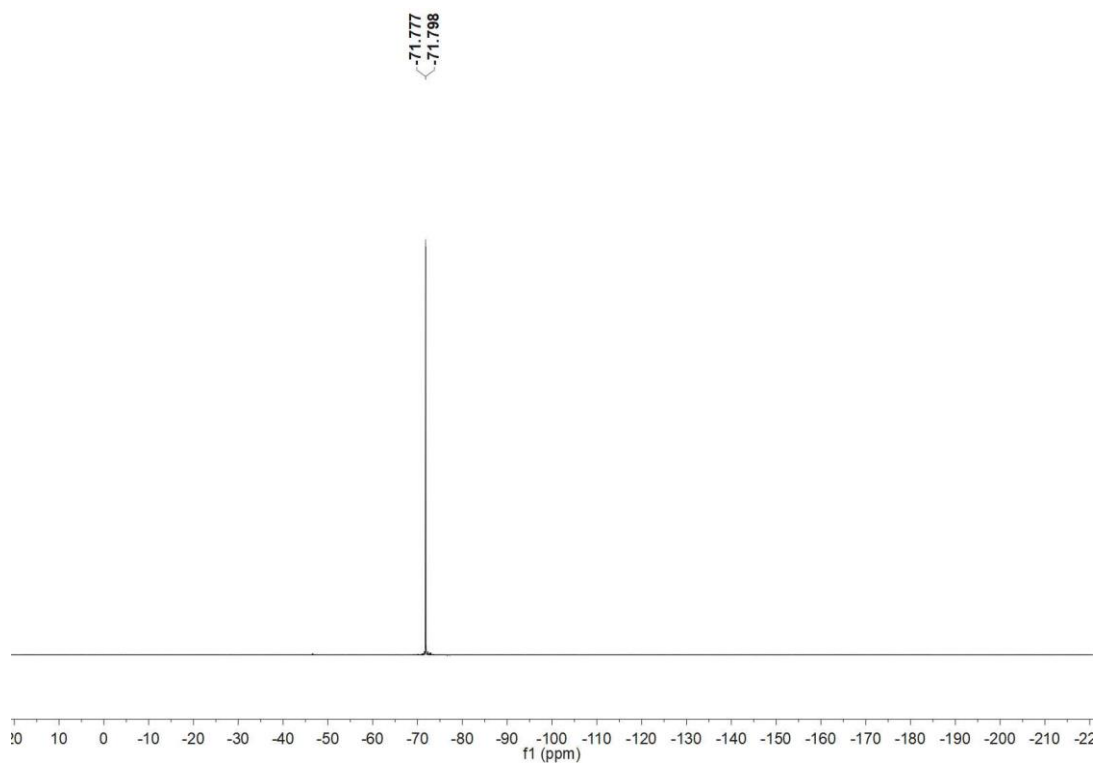

$^{19}\text{F}$  NMR (376 MHz, Chloroform-d)

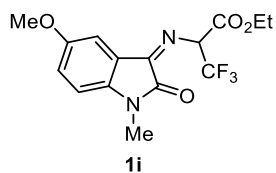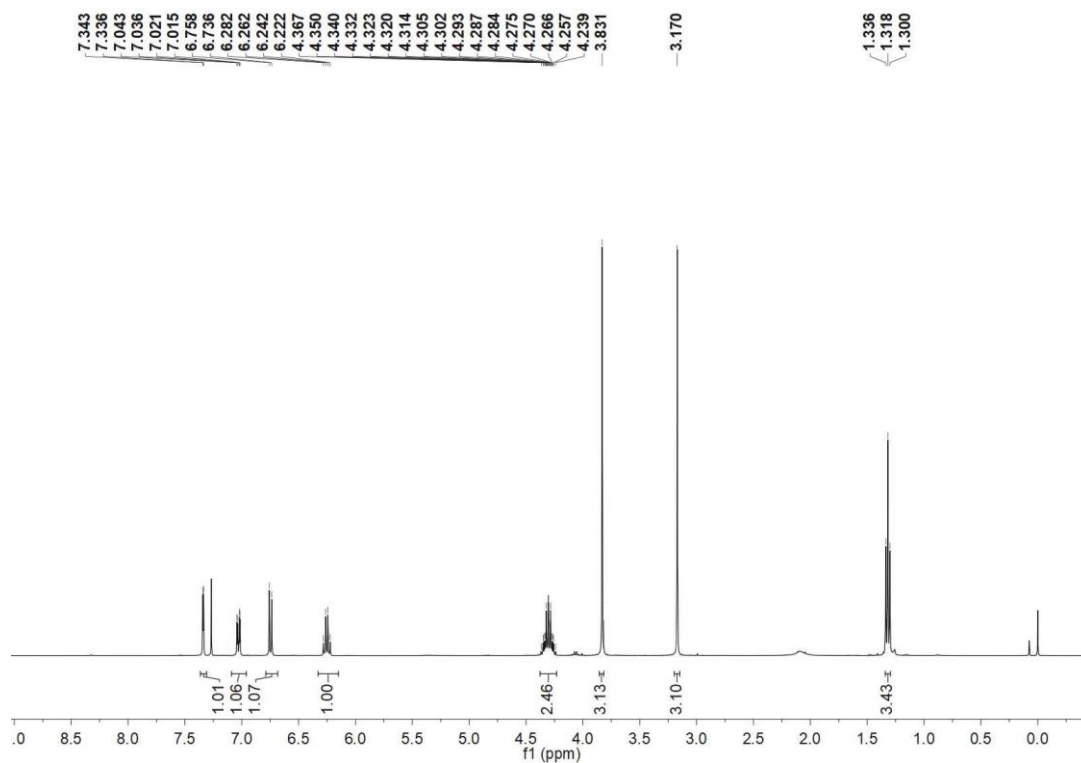

<sup>1</sup>H NMR (400 MHz, Chloroform-d)

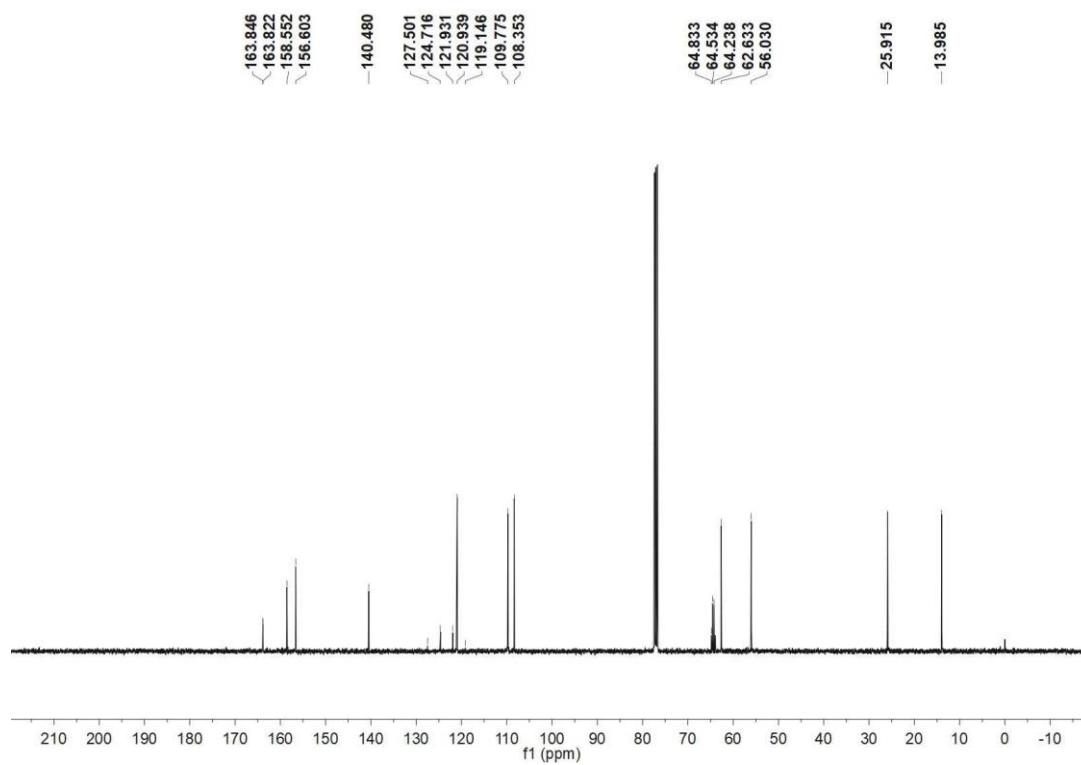

<sup>13</sup>C NMR (101 MHz, Chloroform-d)

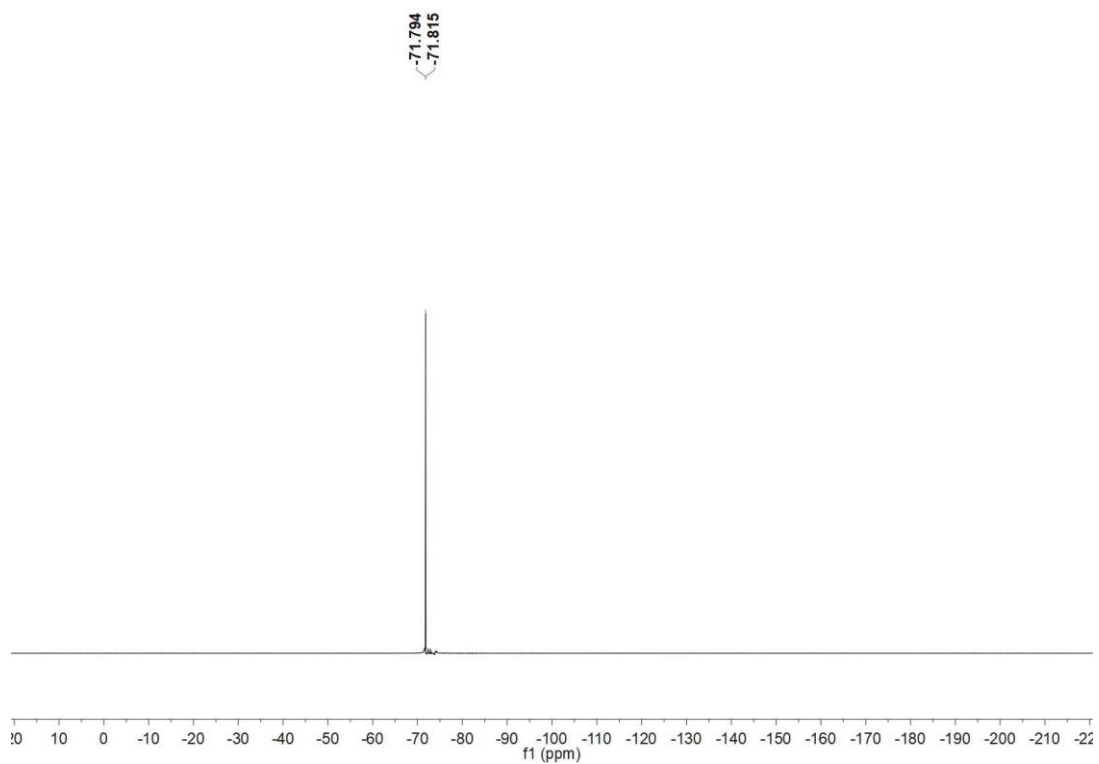

$^{19}\text{F}$  NMR (376 MHz, Chloroform-d)

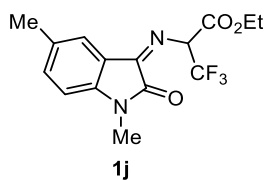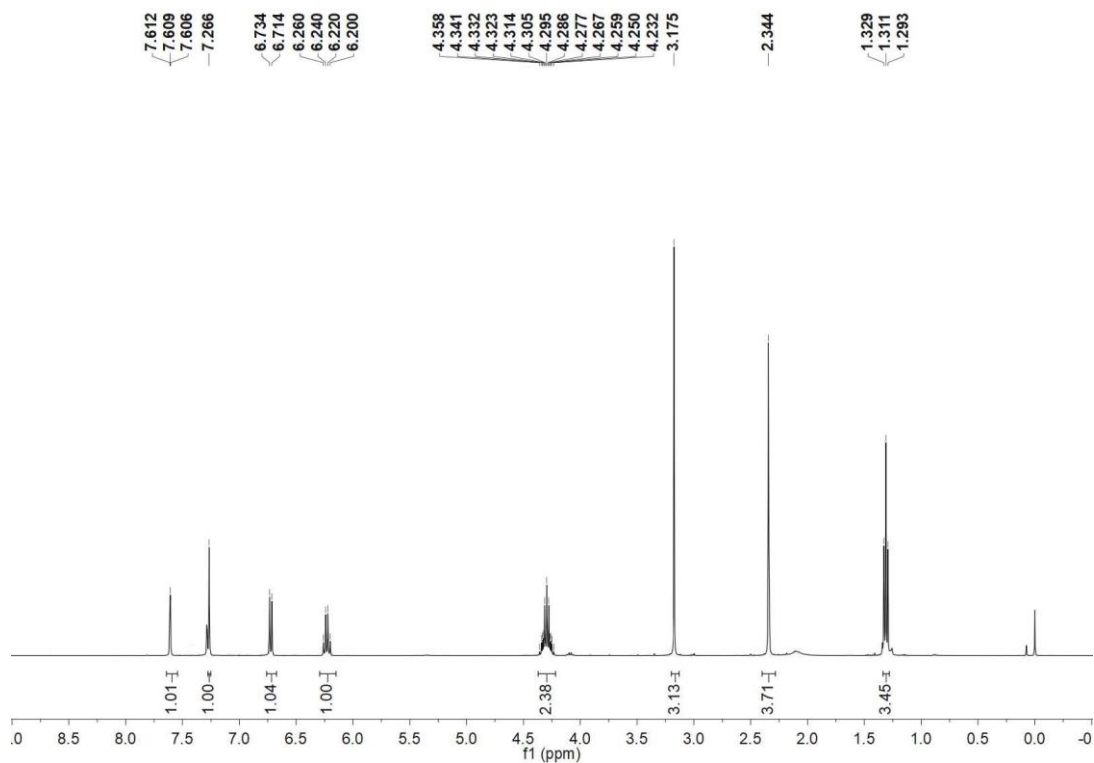

<sup>1</sup>H NMR (400 MHz, Chloroform-d)

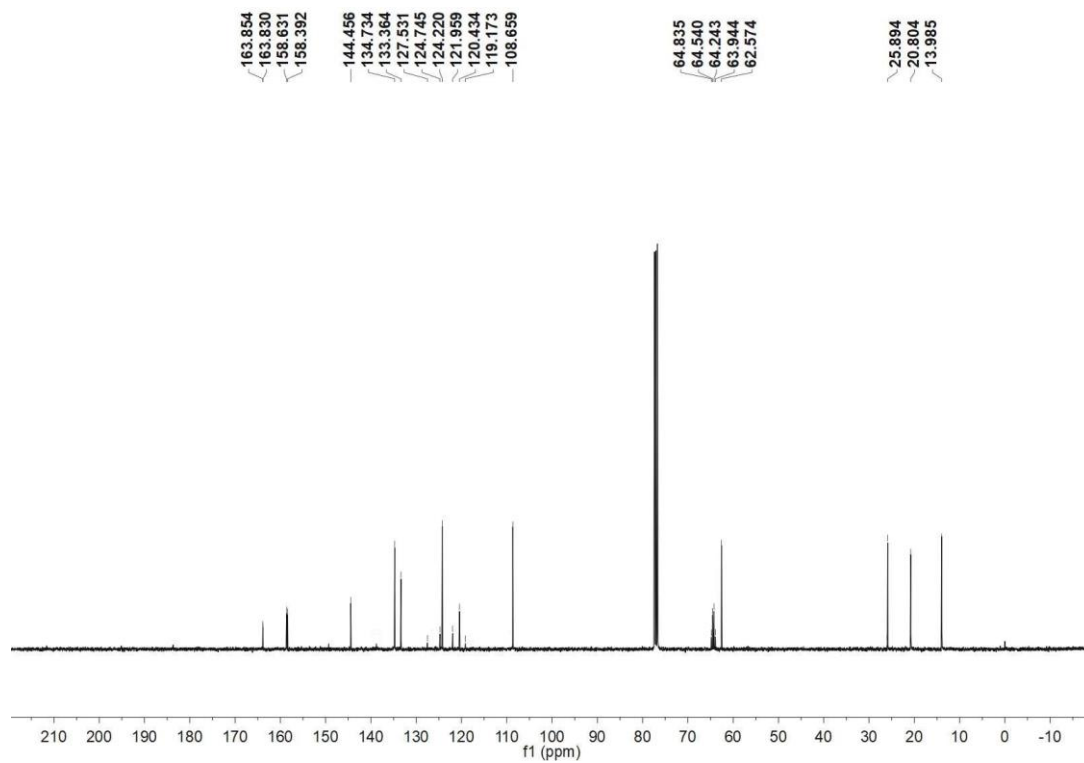

<sup>13</sup>C NMR (101 MHz, Chloroform-d)



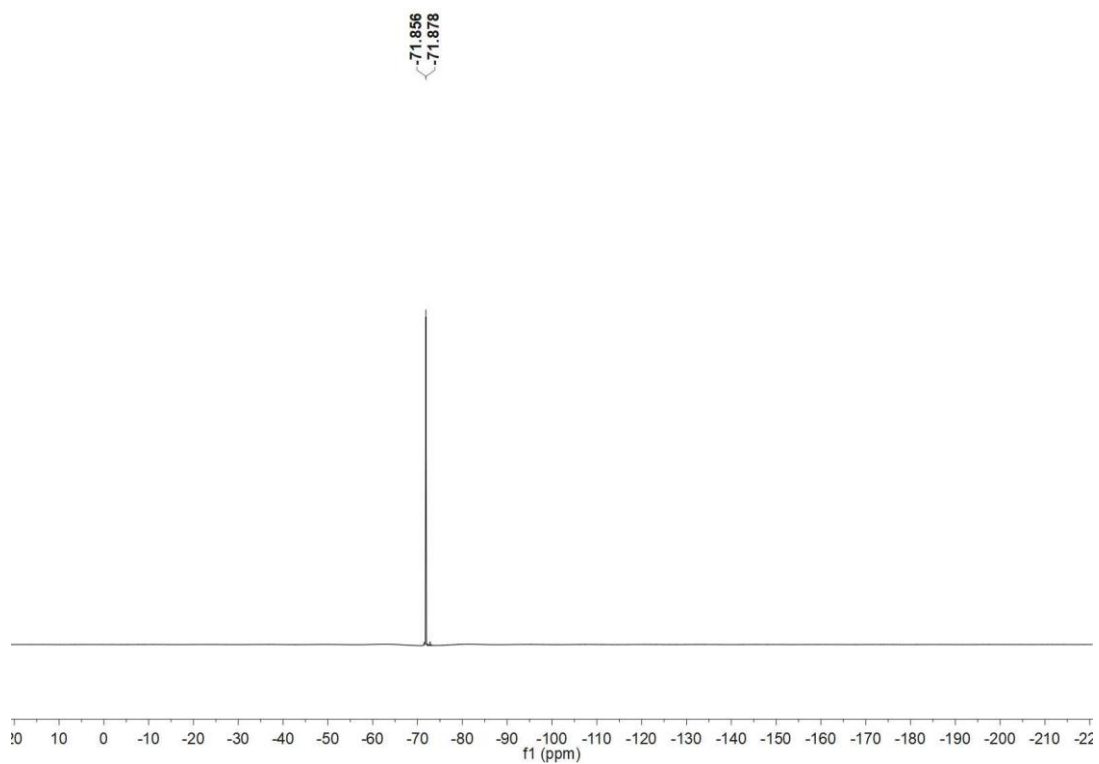

$^{19}\text{F}$  NMR (376 MHz, Chloroform-d)

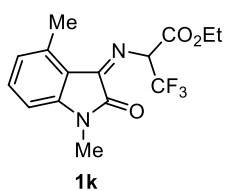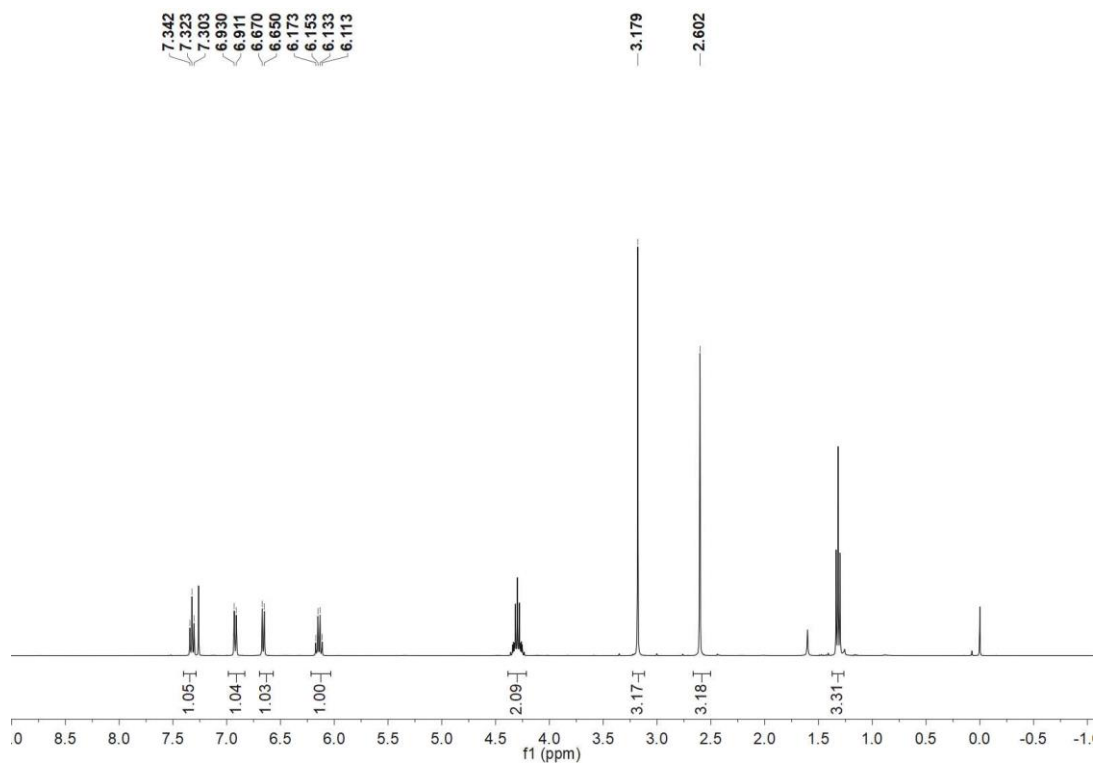

<sup>1</sup>H NMR (400 MHz, Chloroform-d)

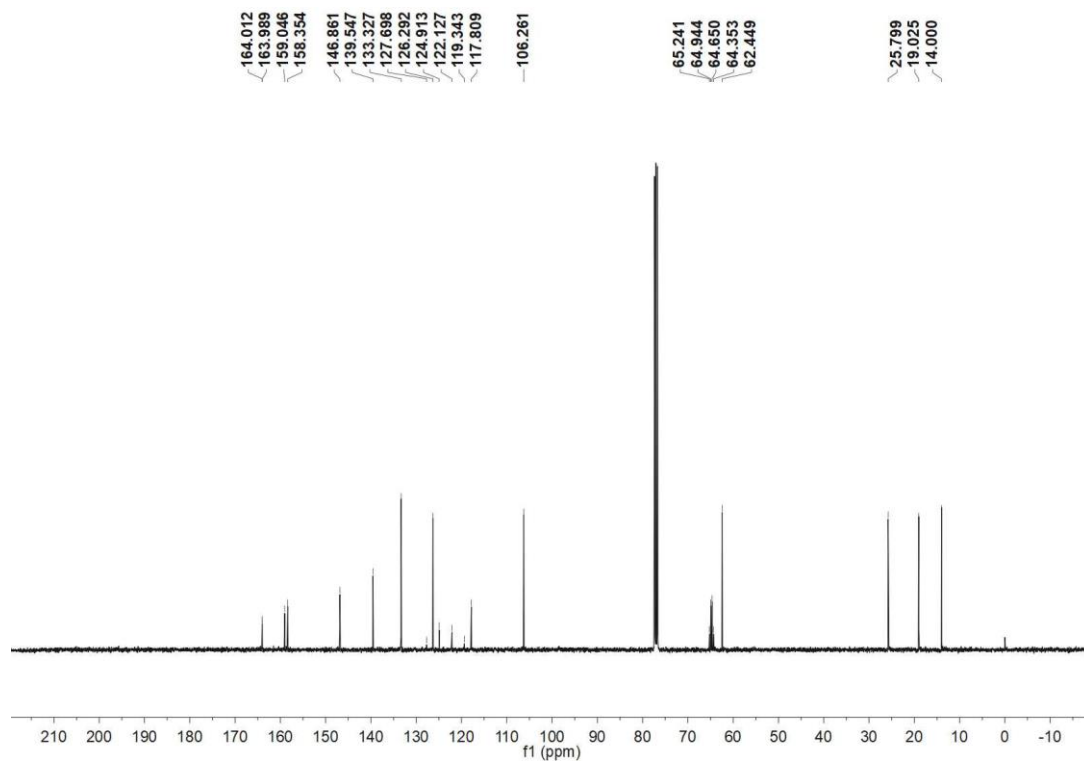

<sup>13</sup>C NMR (101 MHz, Chloroform-d)

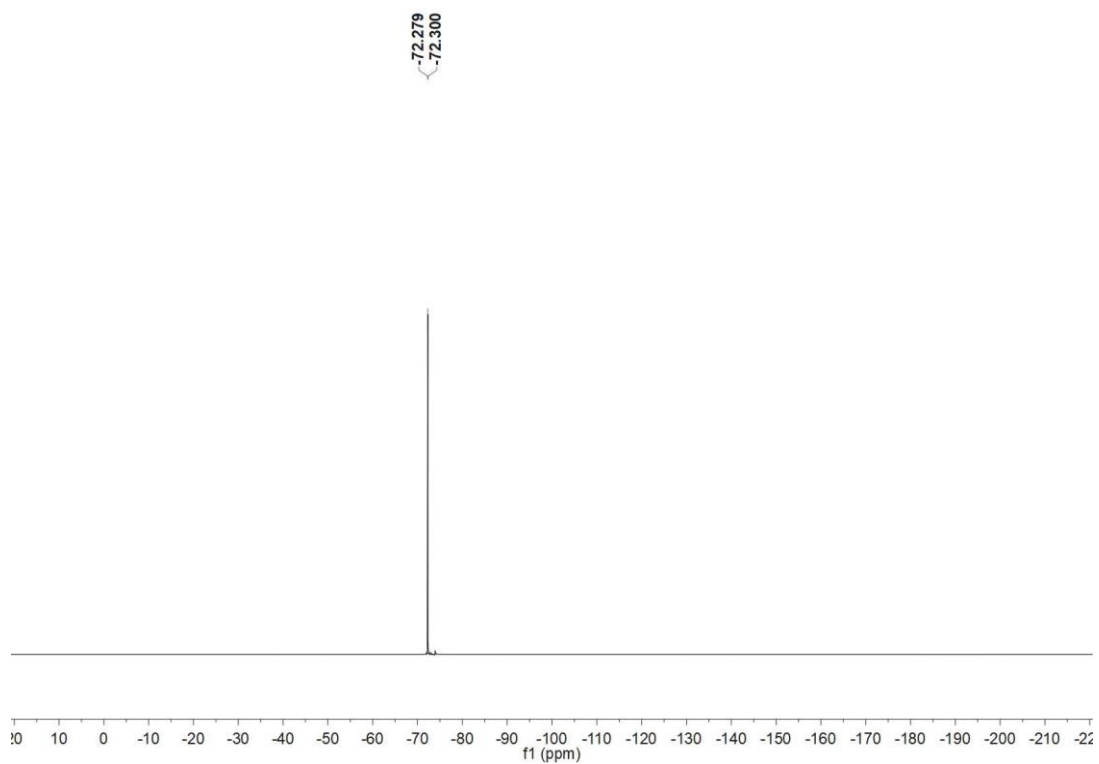

$^{19}\text{F}$  NMR (376 MHz, Chloroform-d)

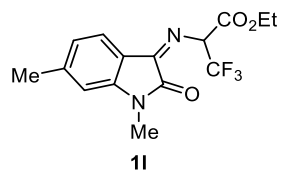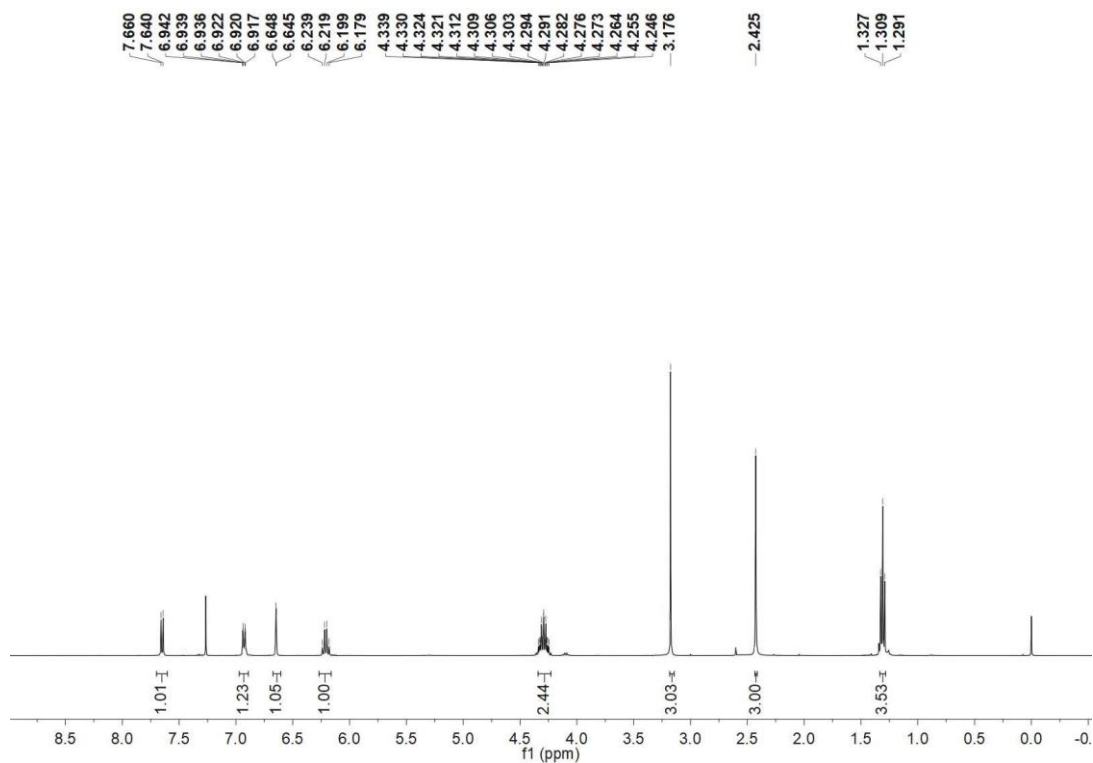

<sup>1</sup>H NMR (400 MHz, Chloroform-d)

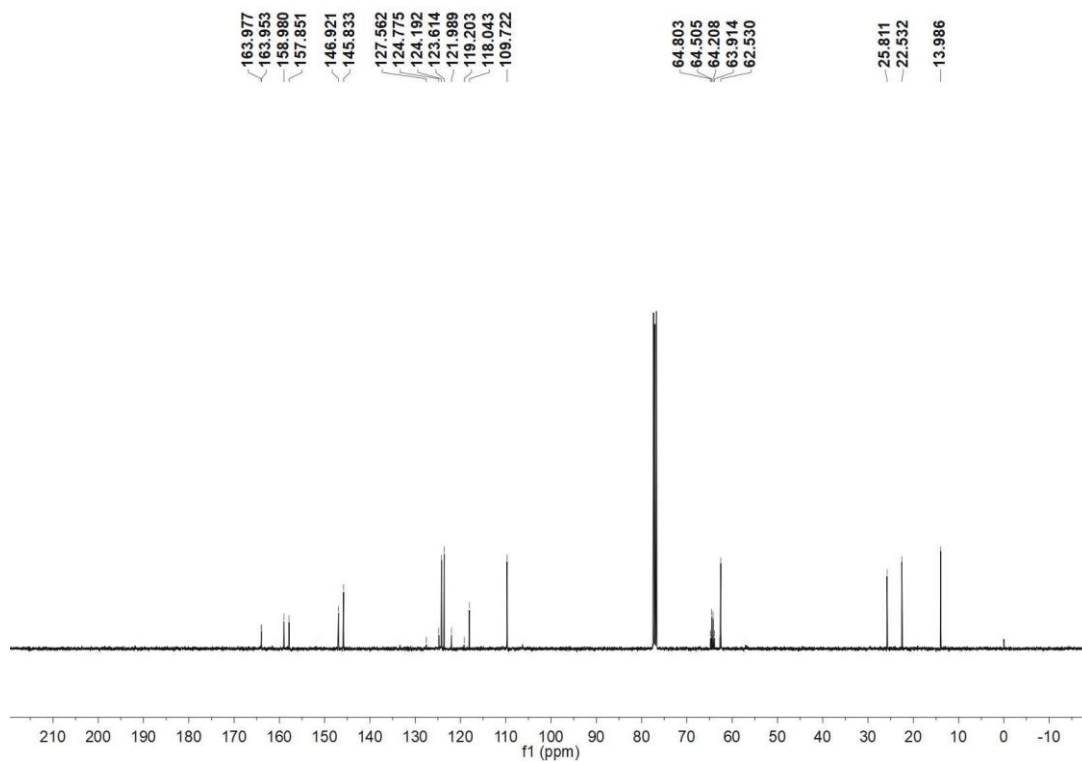

<sup>13</sup>C NMR (101 MHz, Chloroform-d)

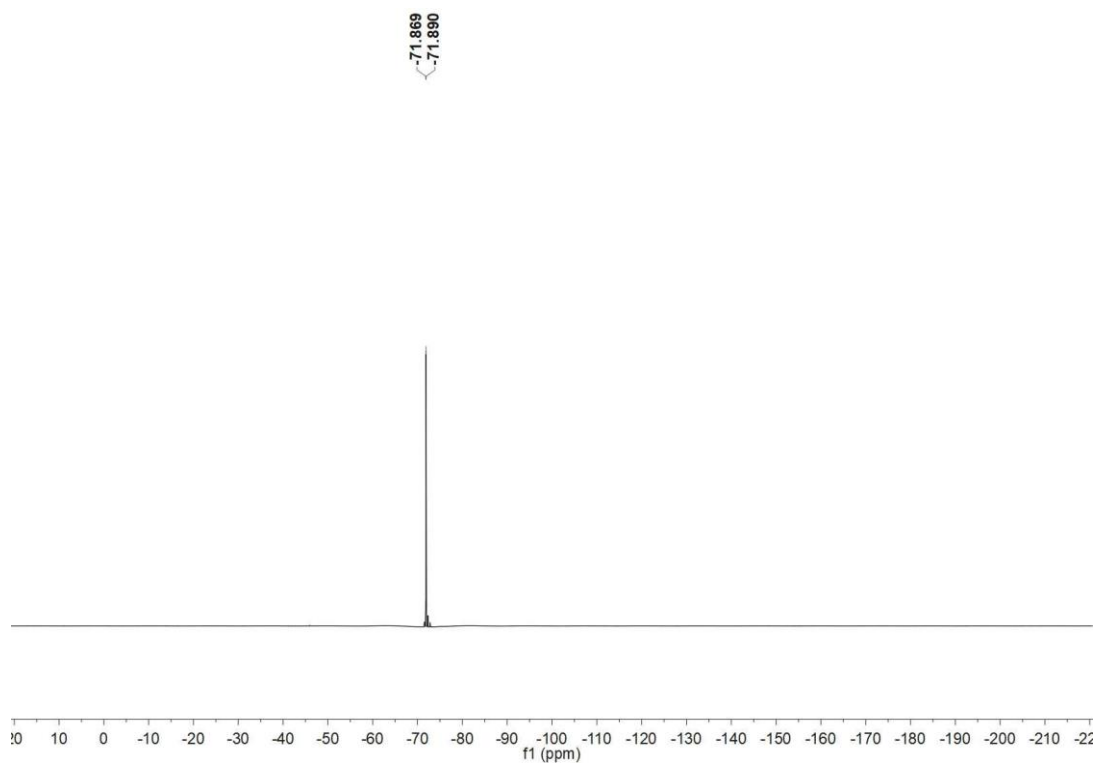

$^{19}\text{F}$  NMR (376 MHz, Chloroform-d)

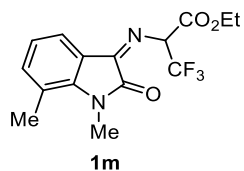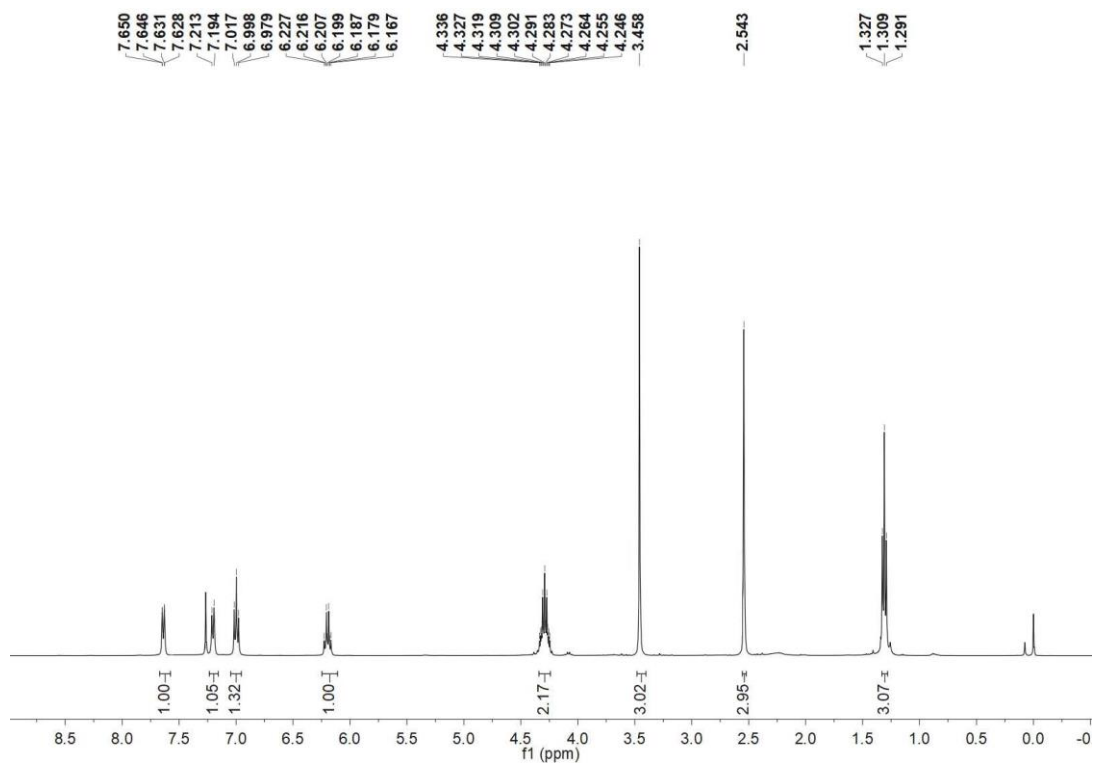

<sup>1</sup>H NMR (400 MHz, Chloroform-d)

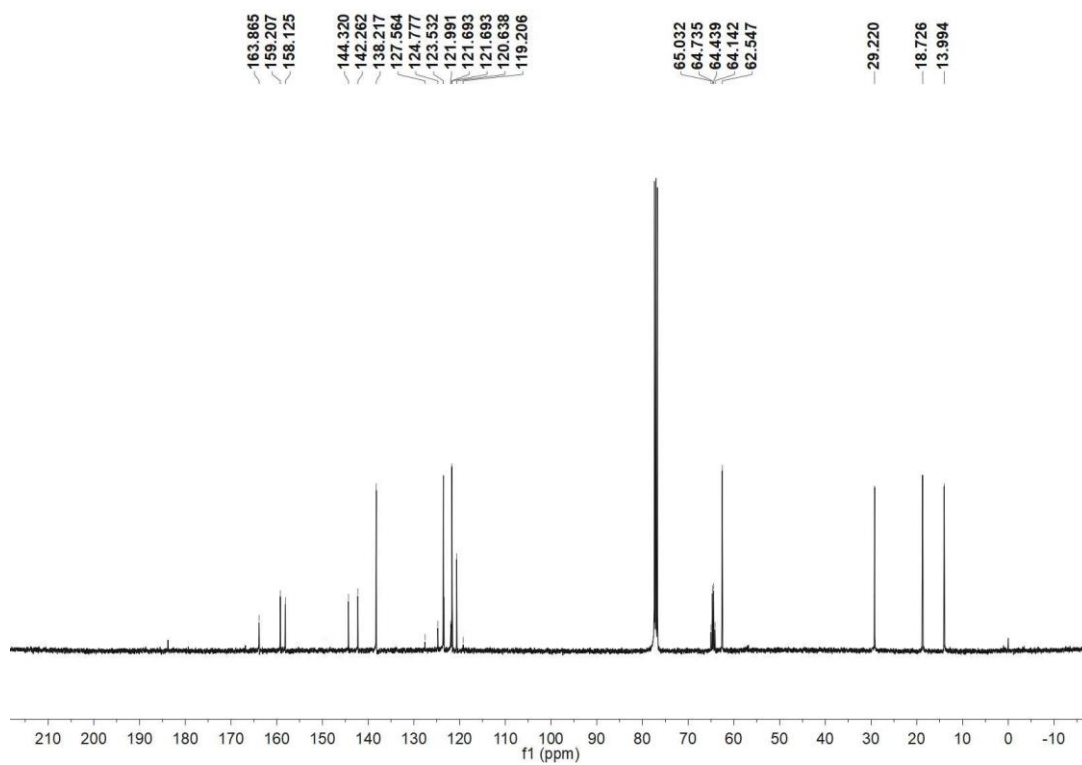

<sup>13</sup>C NMR (101 MHz, Chloroform-d)

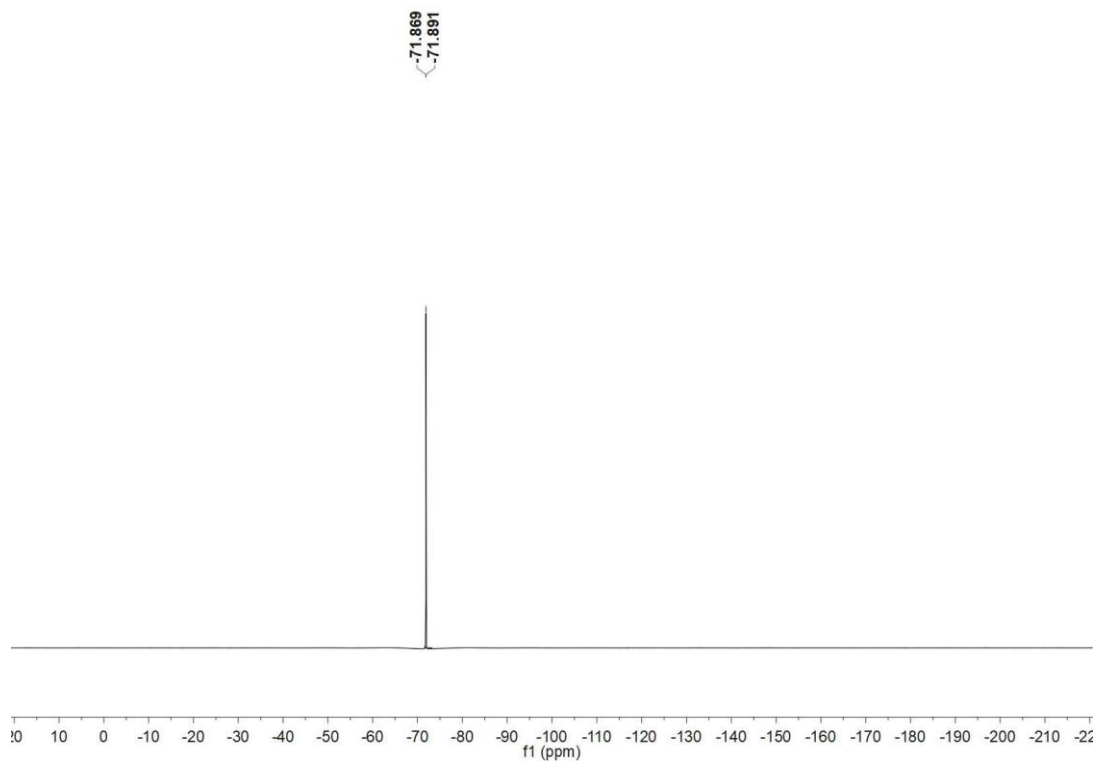

$^{19}\text{F}$  NMR (376 MHz, Chloroform-d)

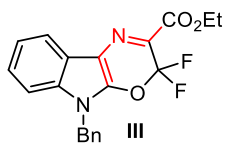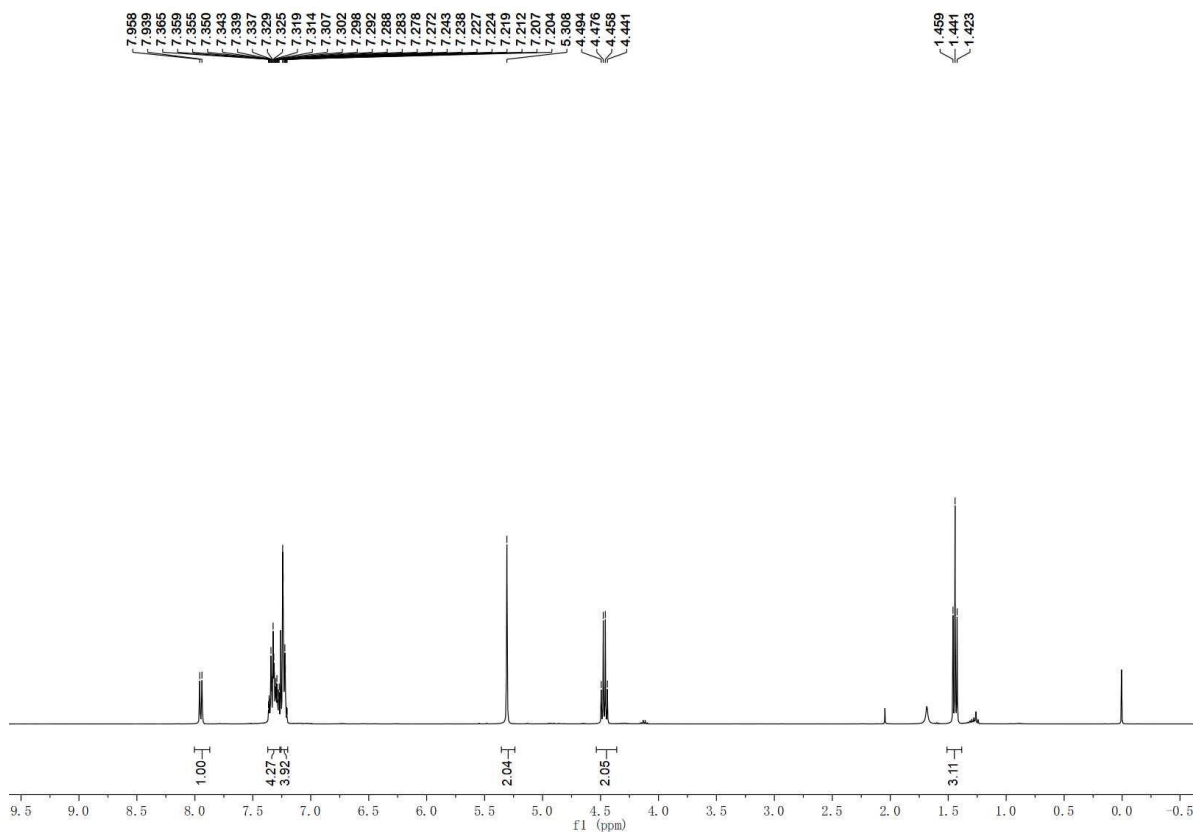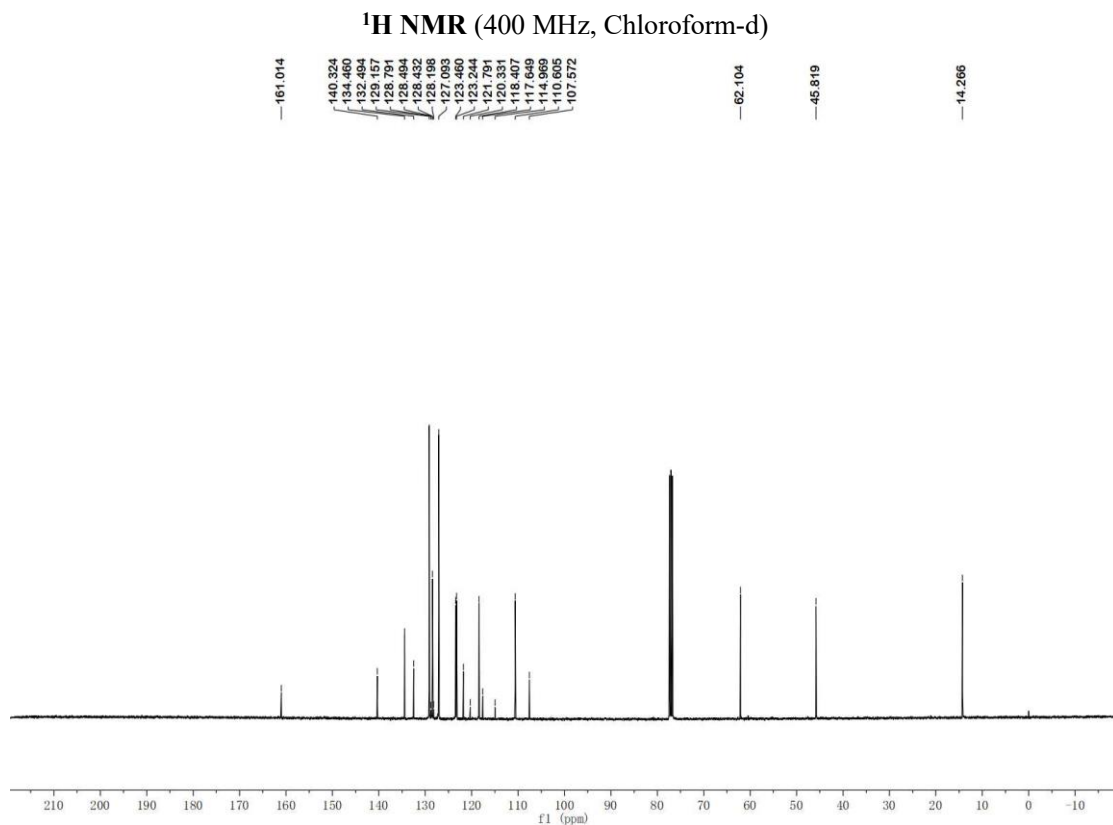



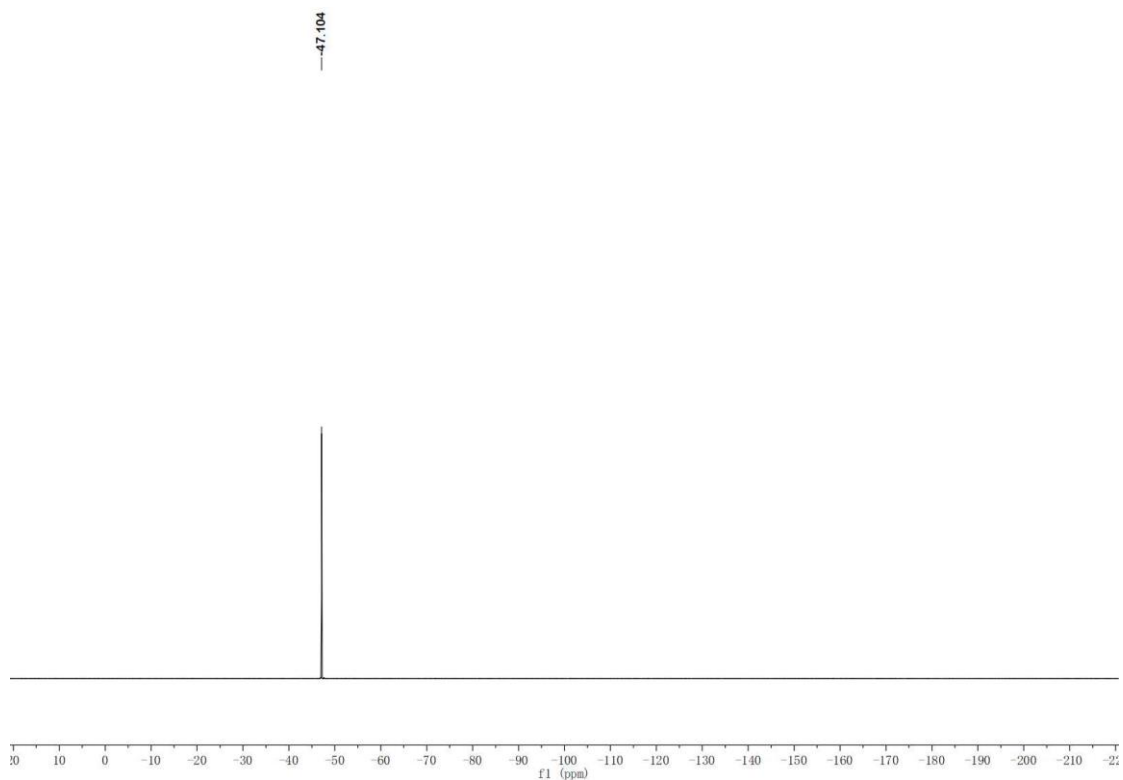

$^{19}\text{F}$  NMR (376 MHz, Chloroform-d)

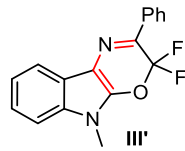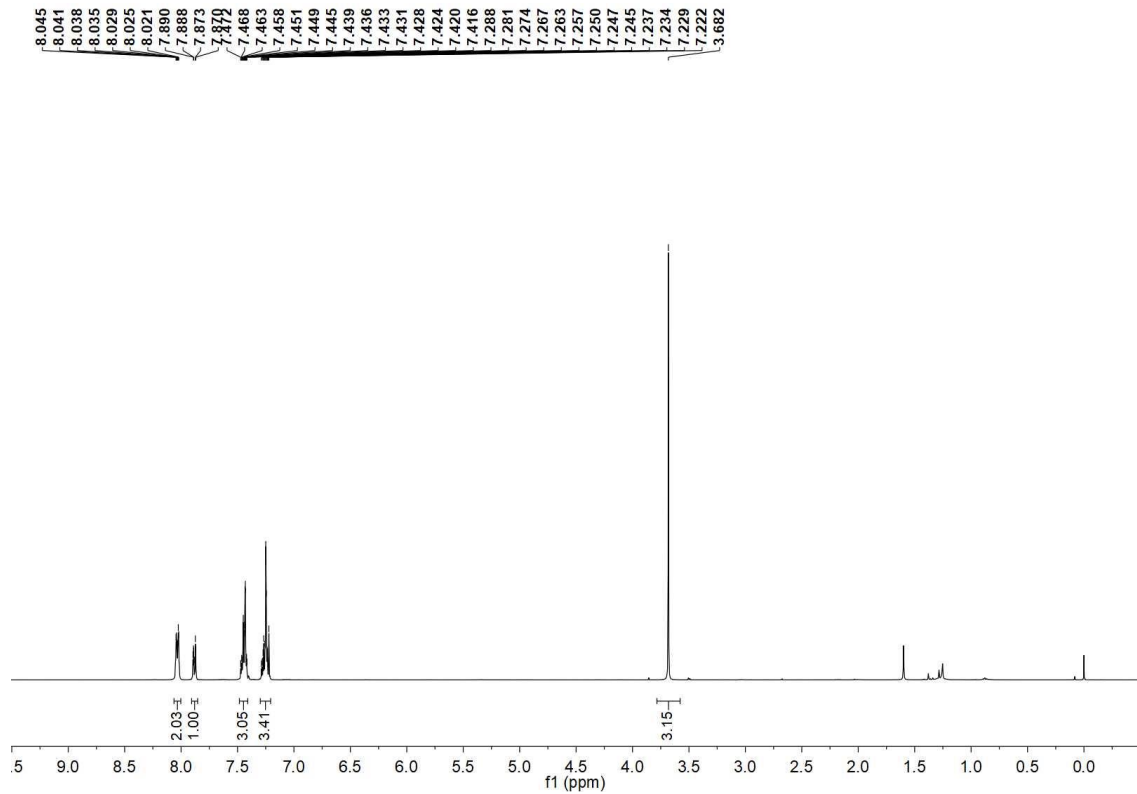

<sup>1</sup>H NMR (400 MHz, Chloroform-d)

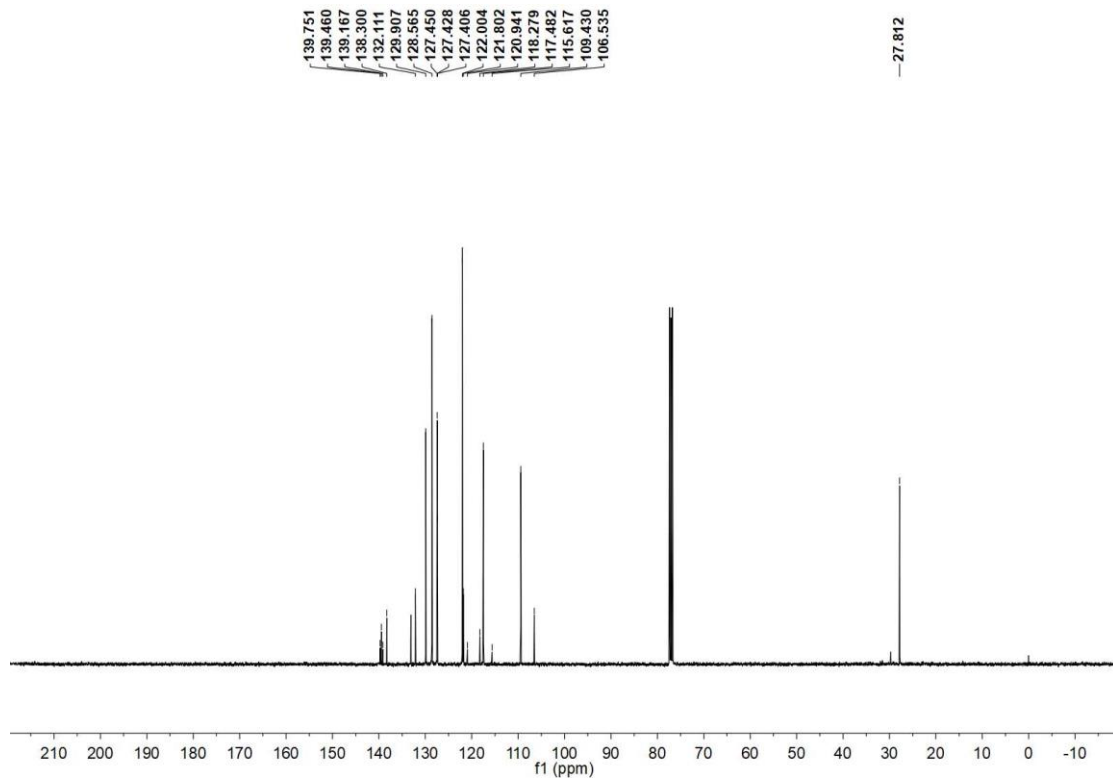

<sup>13</sup>C NMR (101 MHz, Chloroform-d)

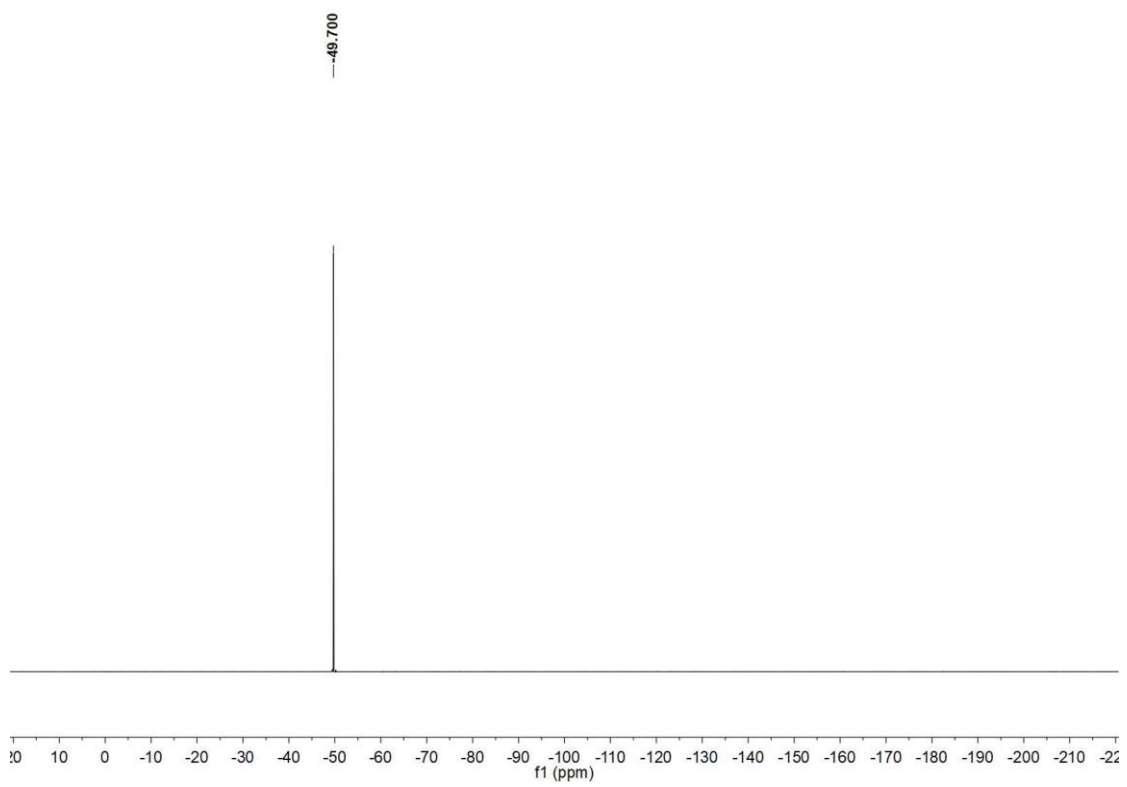

$^{19}\text{F}$  NMR (376 MHz, Chloroform-d)



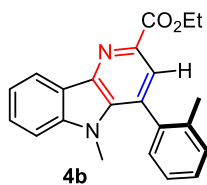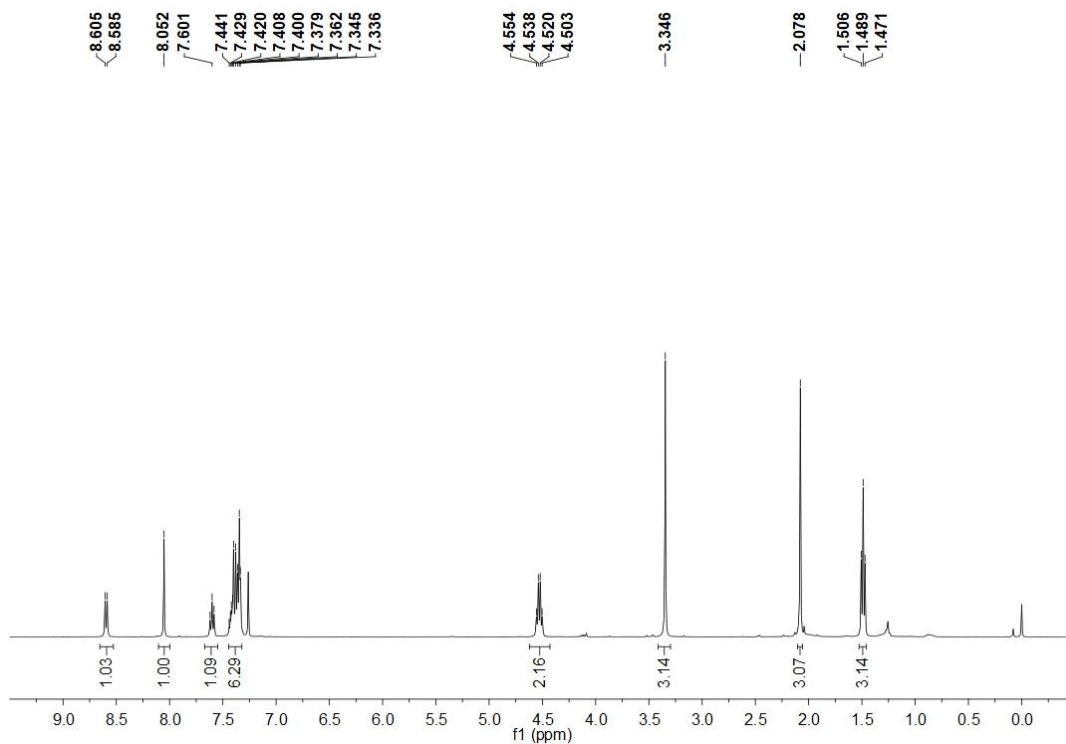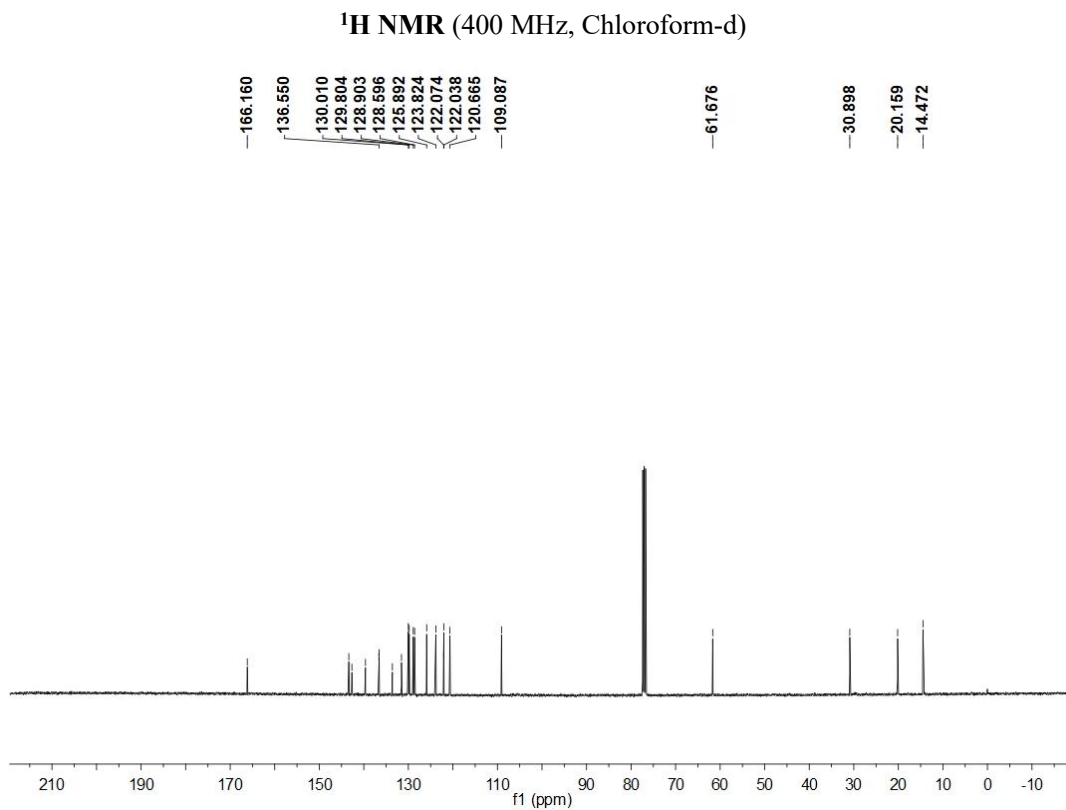

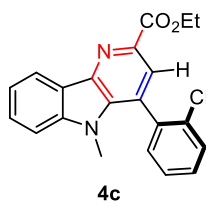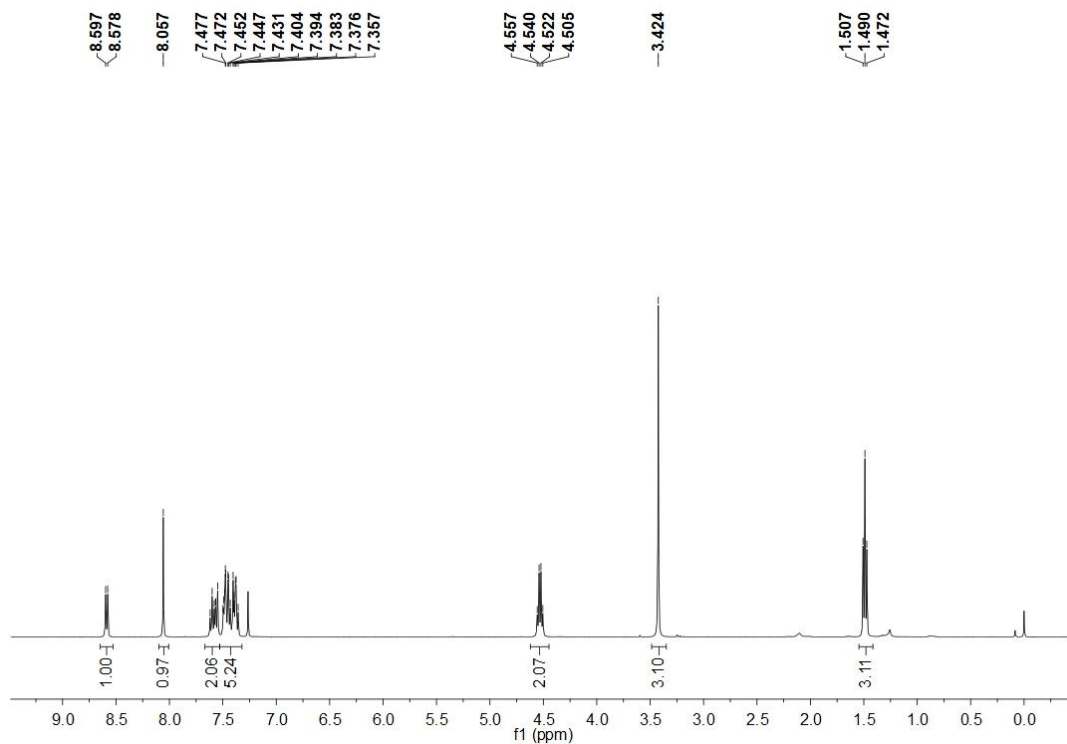

<sup>1</sup>H NMR (400 MHz, Chloroform-d)

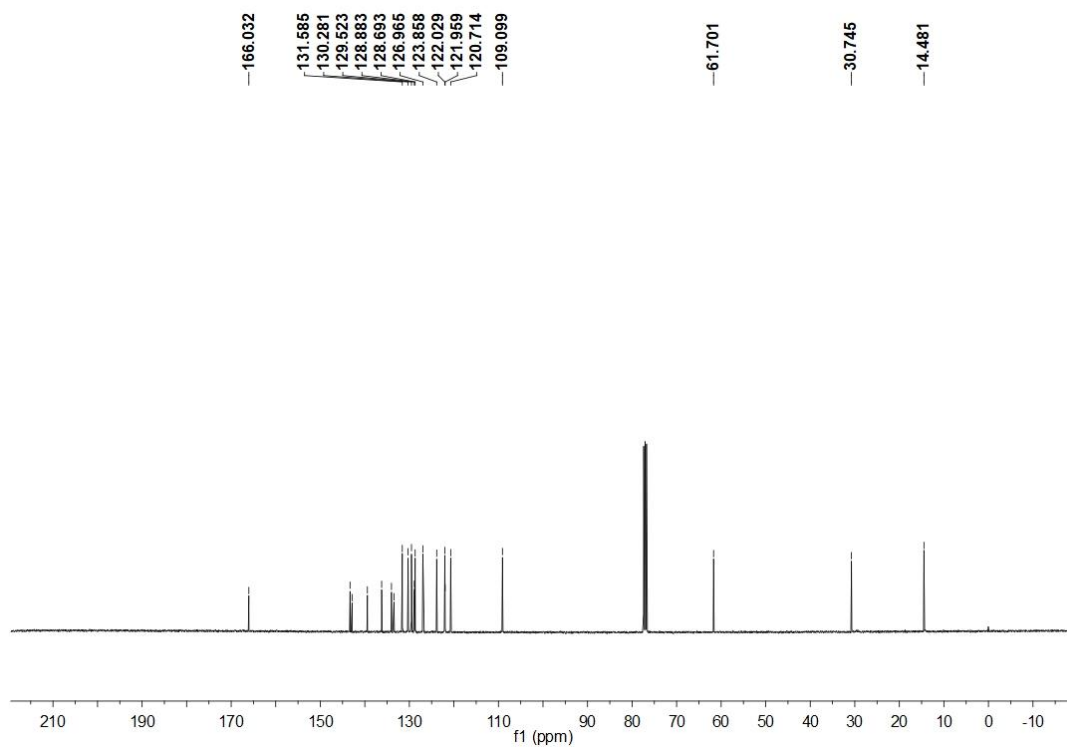

<sup>13</sup>C NMR (101 MHz, Chloroform-d)

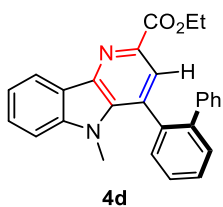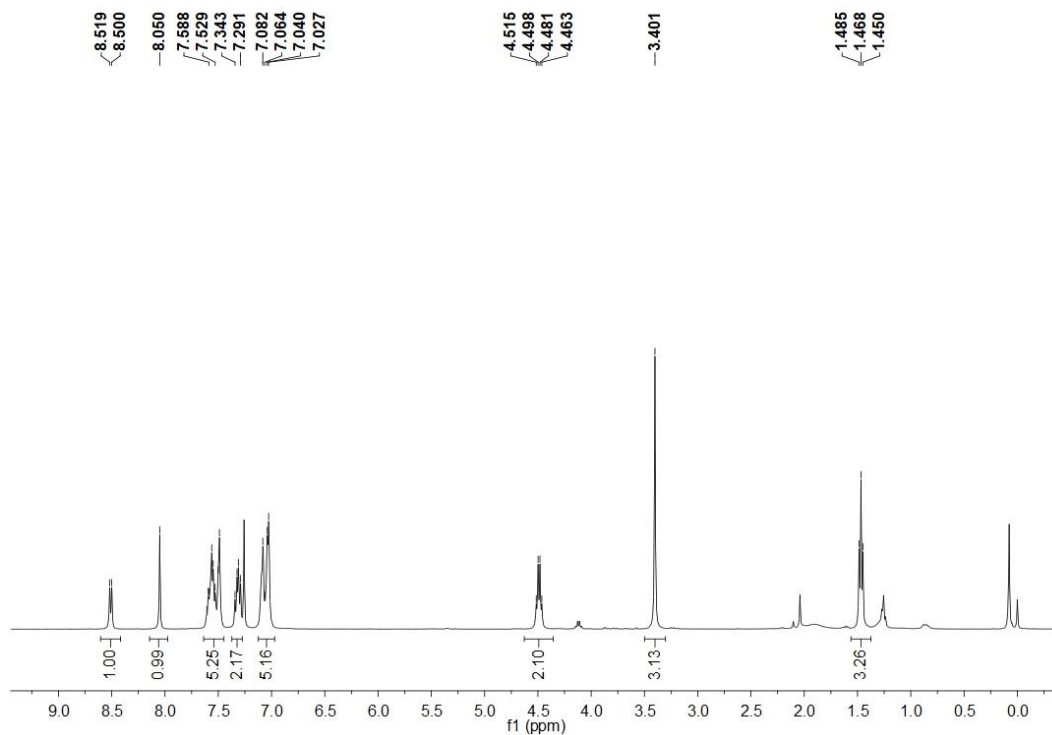

**<sup>1</sup>H NMR (400 MHz, Chloroform-d)**

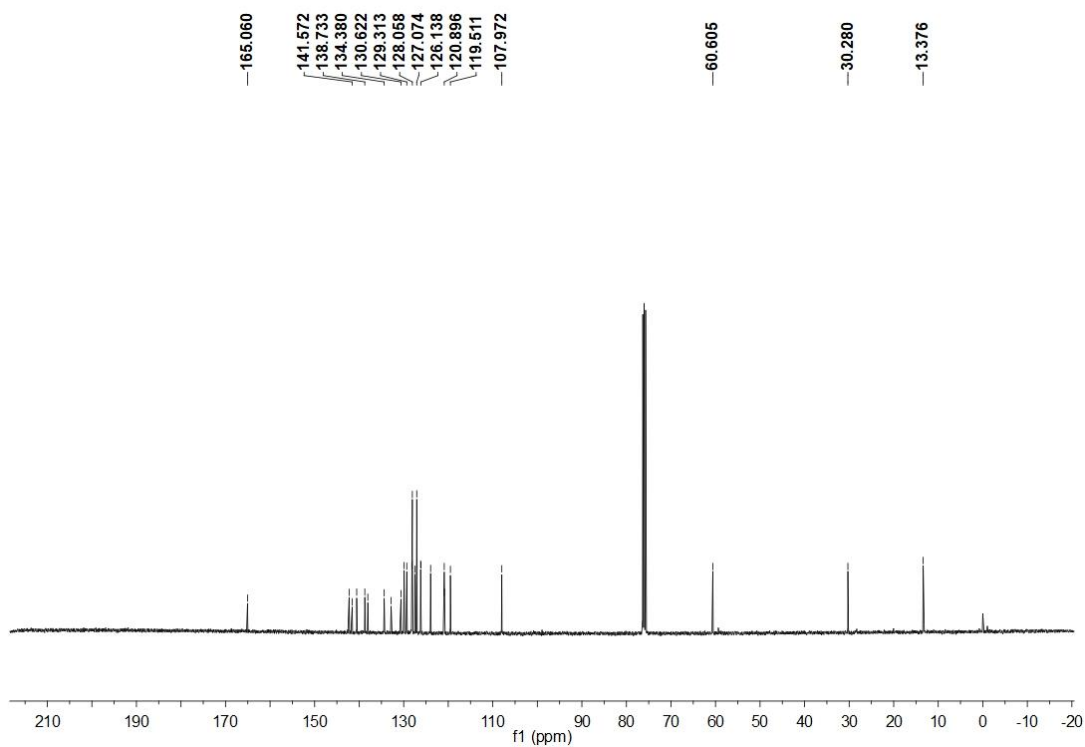

**<sup>13</sup>C NMR (101 MHz, Chloroform-d)**

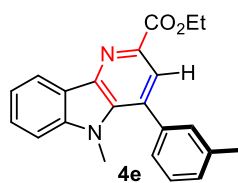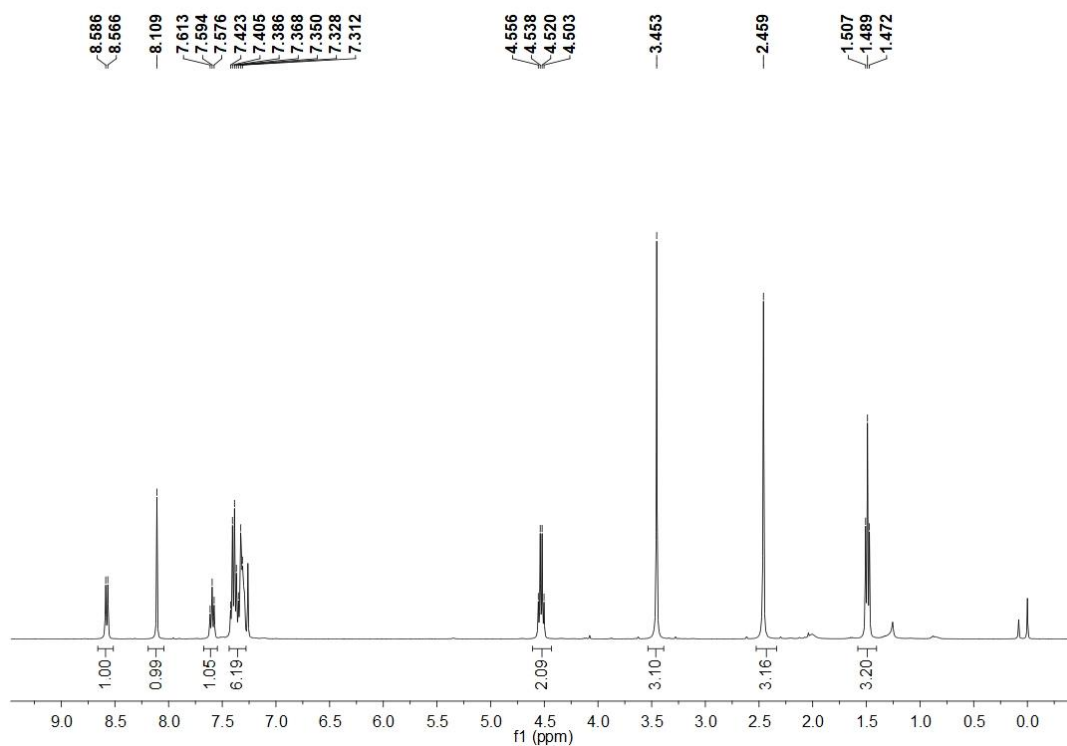

<sup>1</sup>H NMR (400 MHz, Chloroform-d)

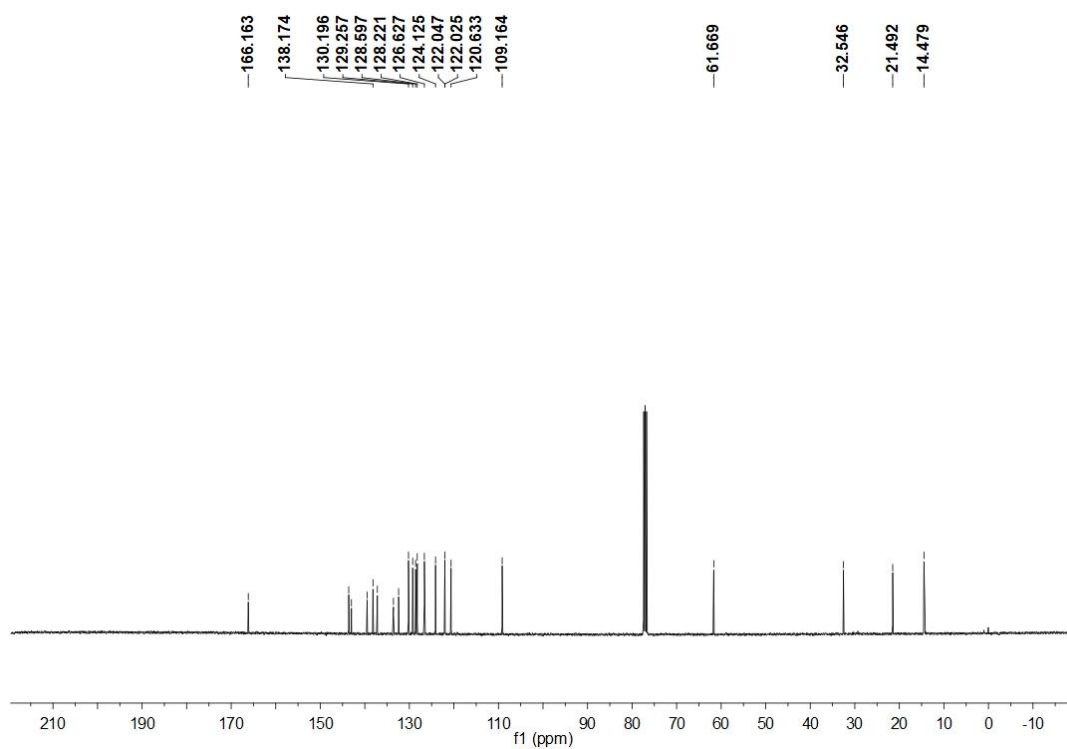

<sup>13</sup>C NMR (101 MHz, Chloroform-d)



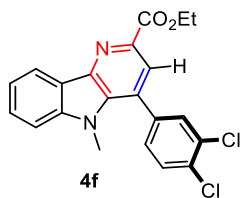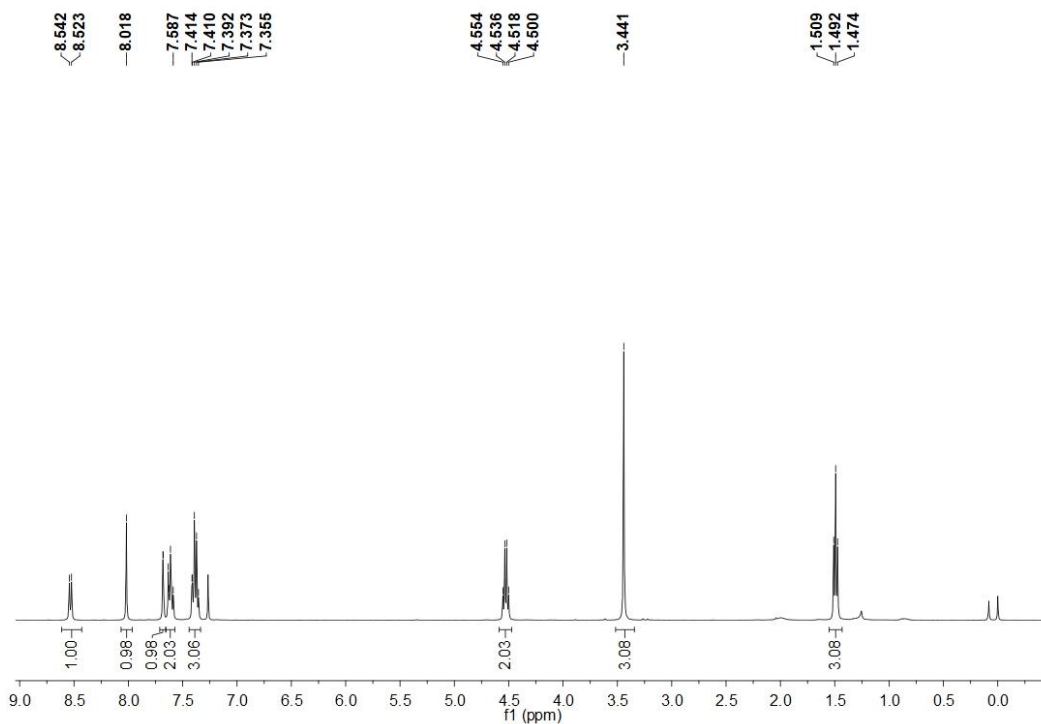

**<sup>1</sup>H NMR (400 MHz, Chloroform-d)**

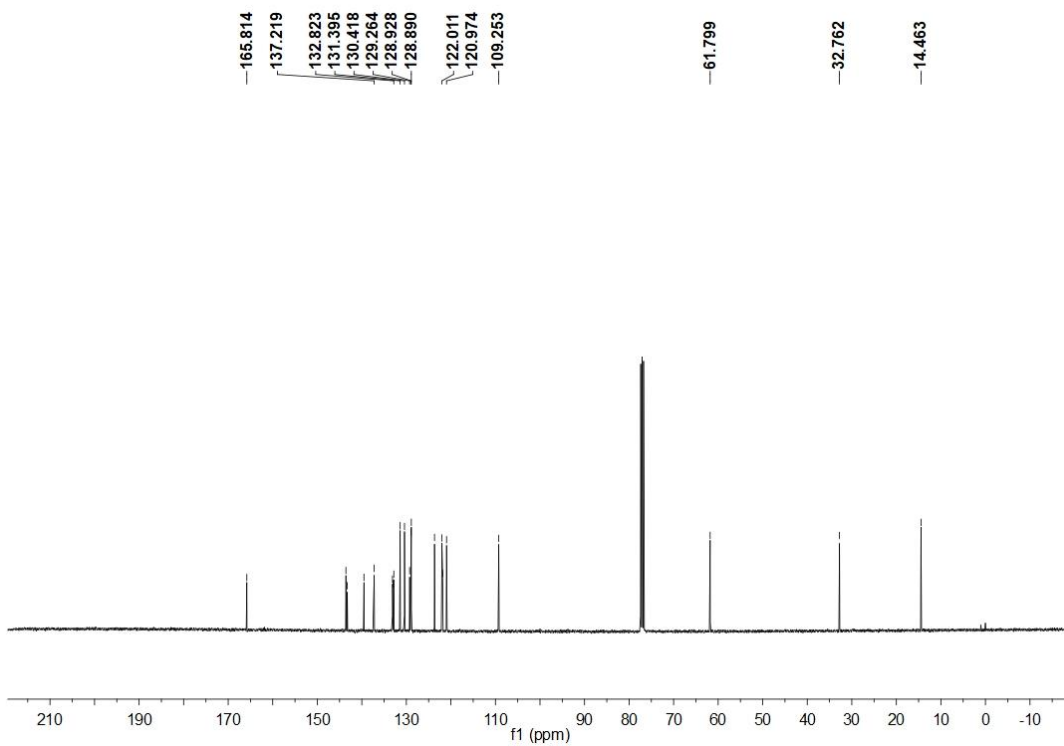

**<sup>13</sup>C NMR (101 MHz, Chloroform-d)**

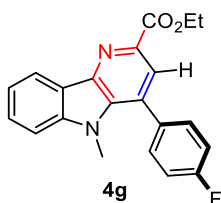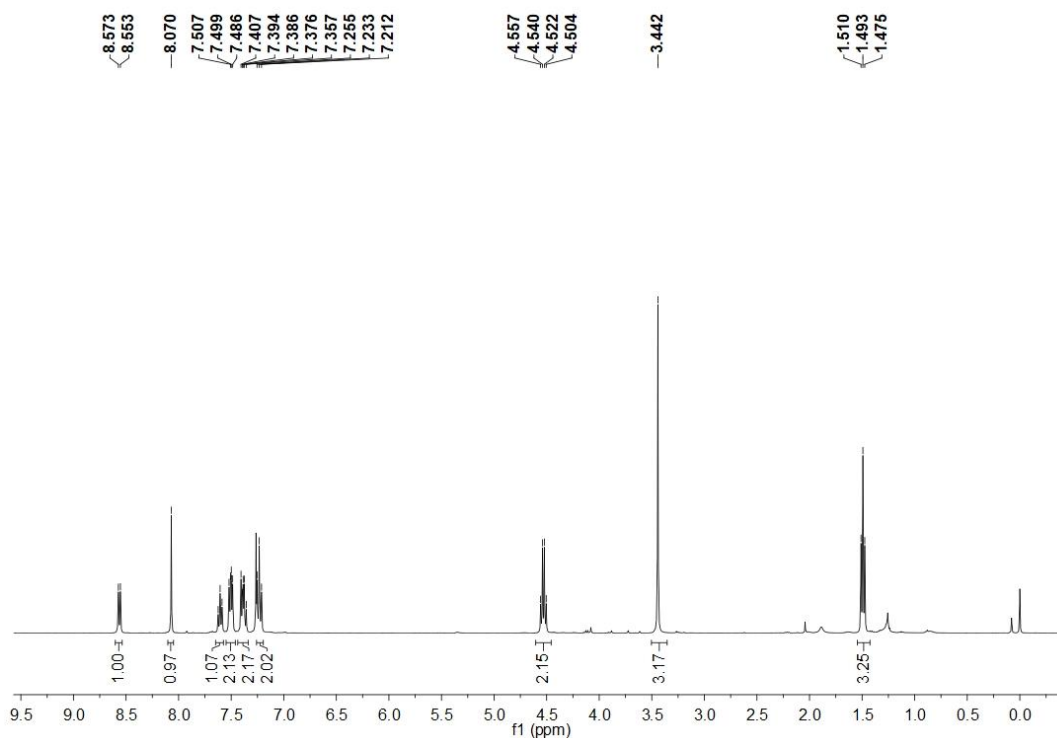

<sup>1</sup>H NMR (400 MHz, Chloroform-d)

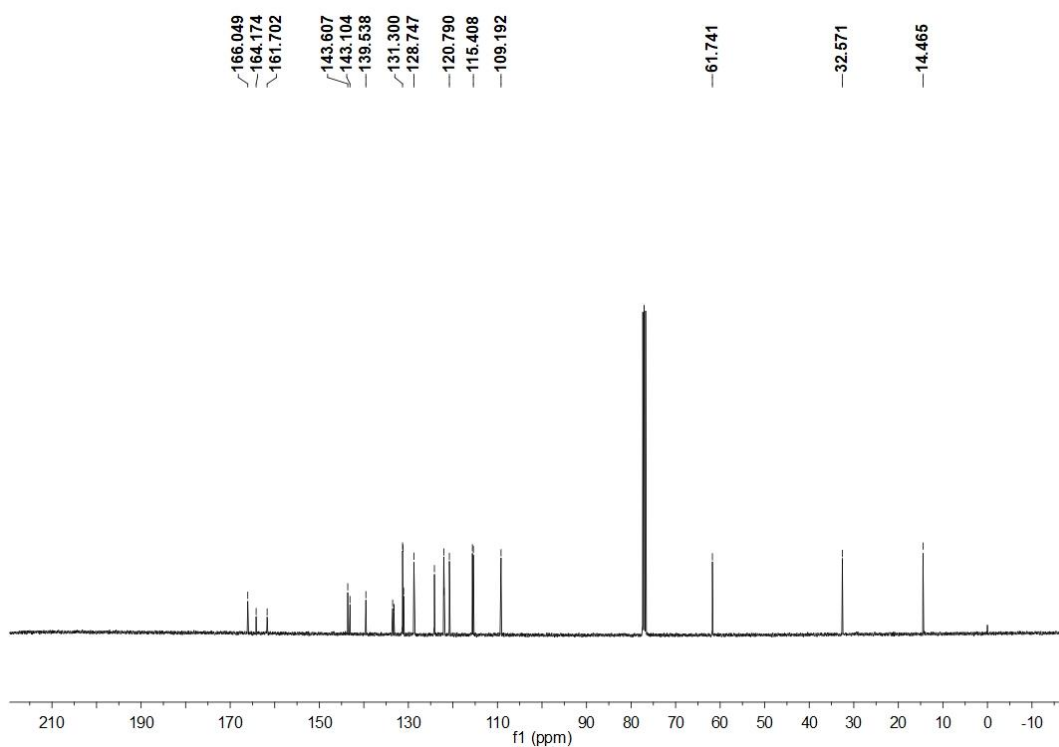

<sup>13</sup>C NMR (101 MHz, Chloroform-d)

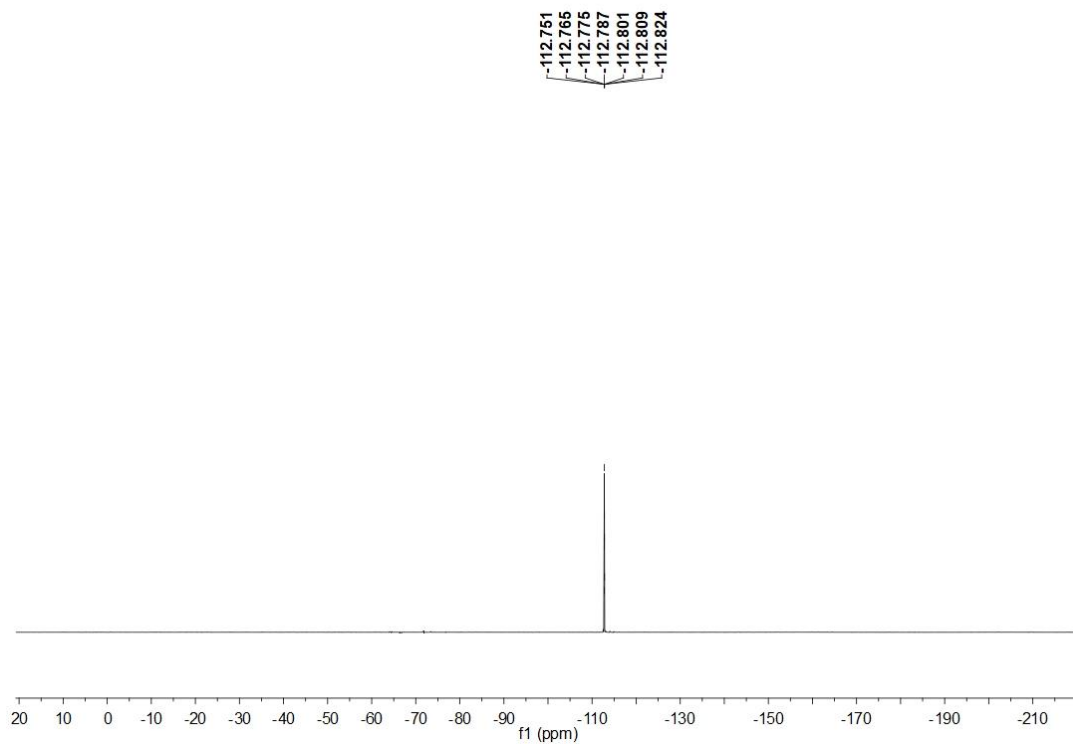

$^{19}\text{F}$  NMR (376 MHz, Chloroform-d)

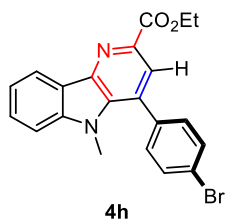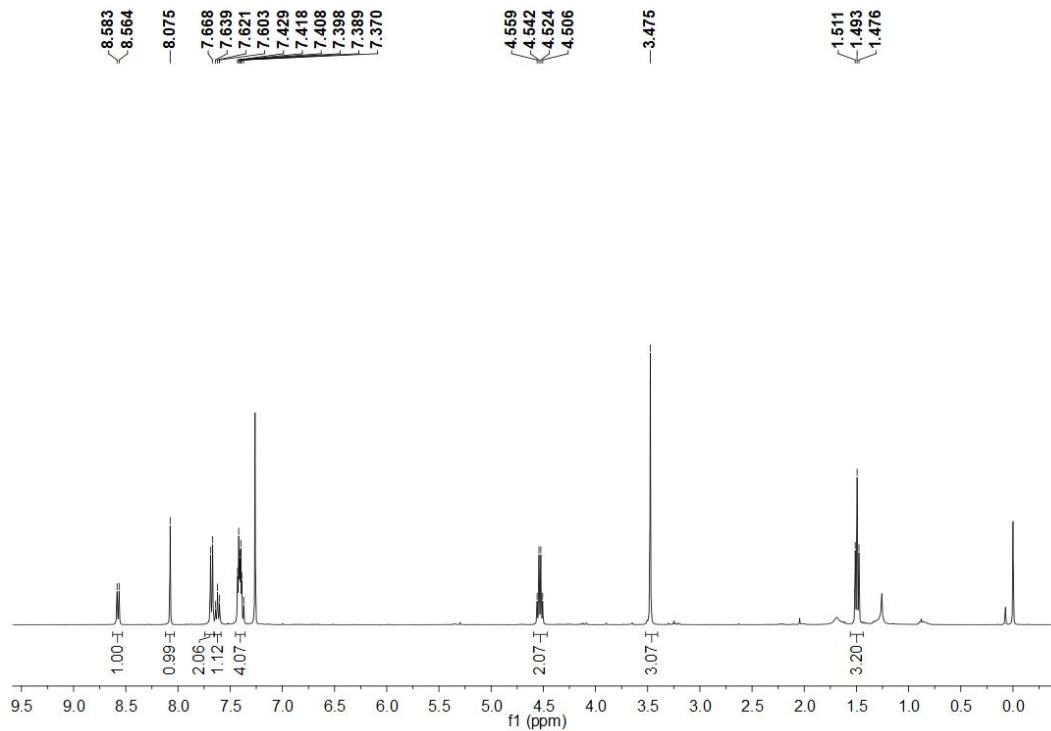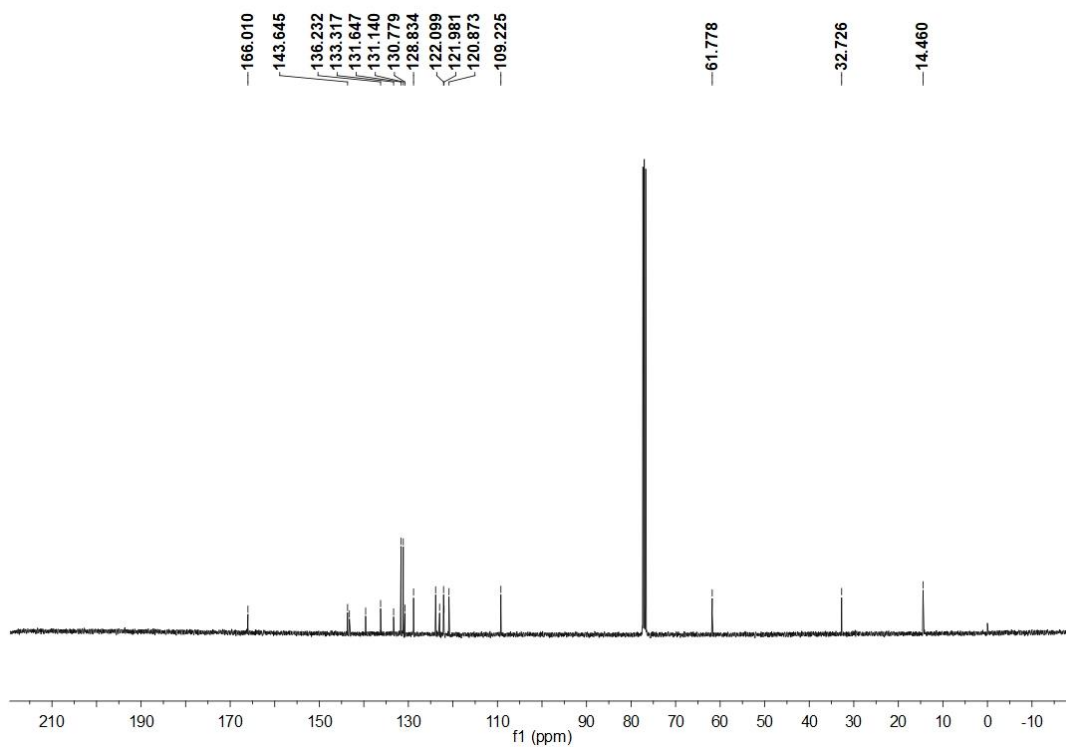

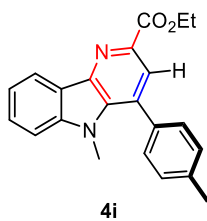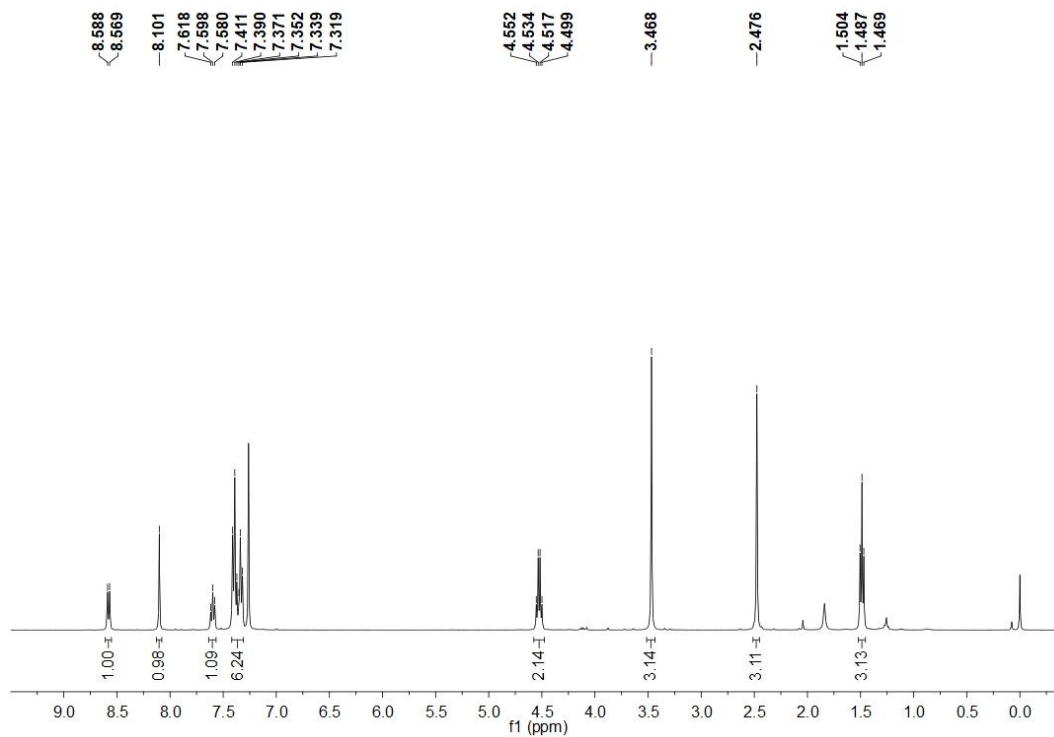

**<sup>1</sup>H NMR (400 MHz, Chloroform-d)**

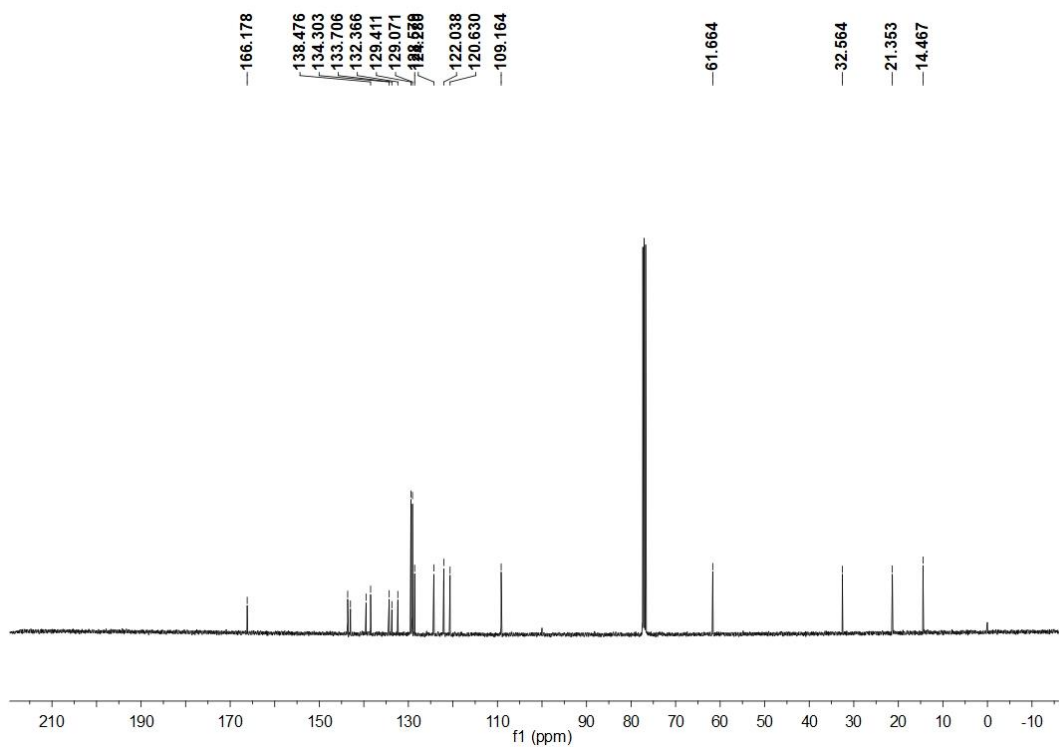

**<sup>13</sup>C NMR (101 MHz, Chloroform-d)**

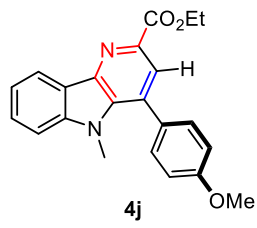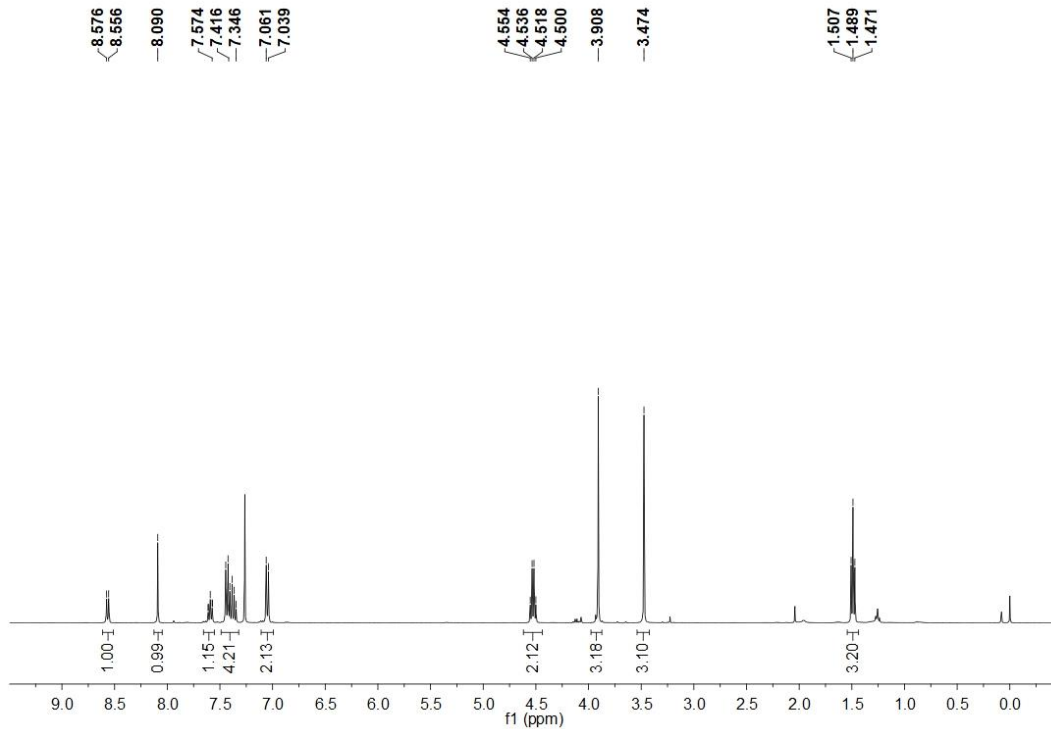

**<sup>1</sup>H NMR (400 MHz, Chloroform-d)**

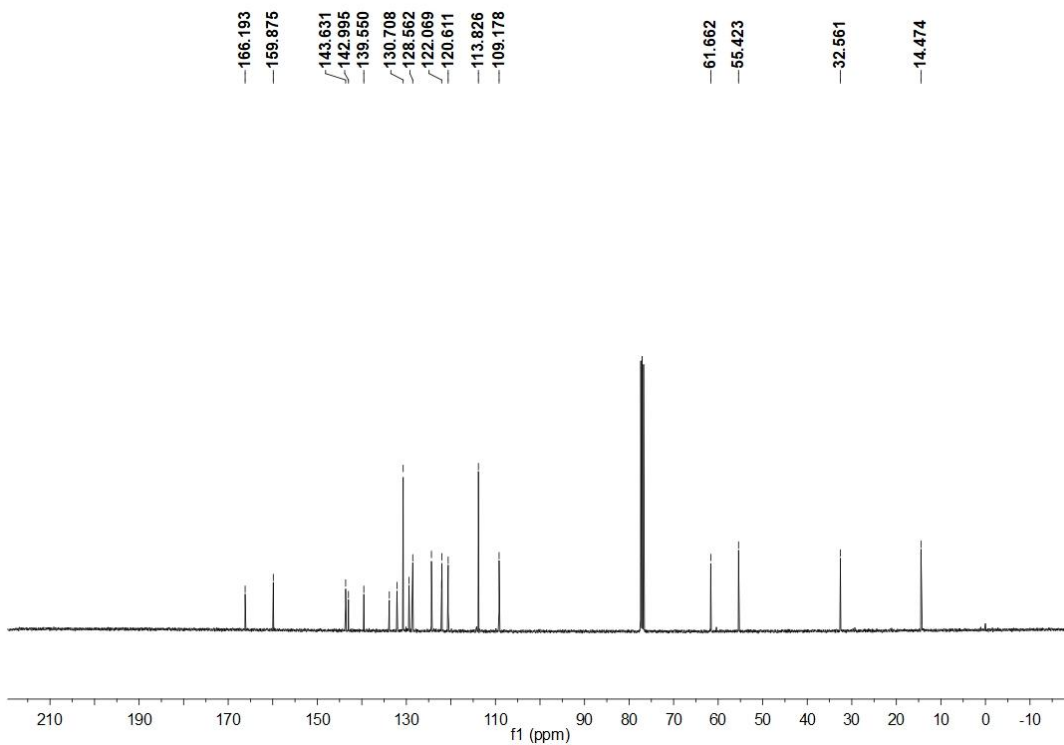

**<sup>13</sup>C NMR (101 MHz, Chloroform-d)**

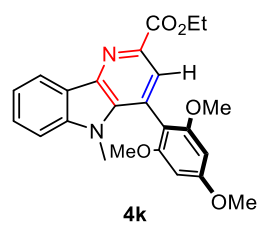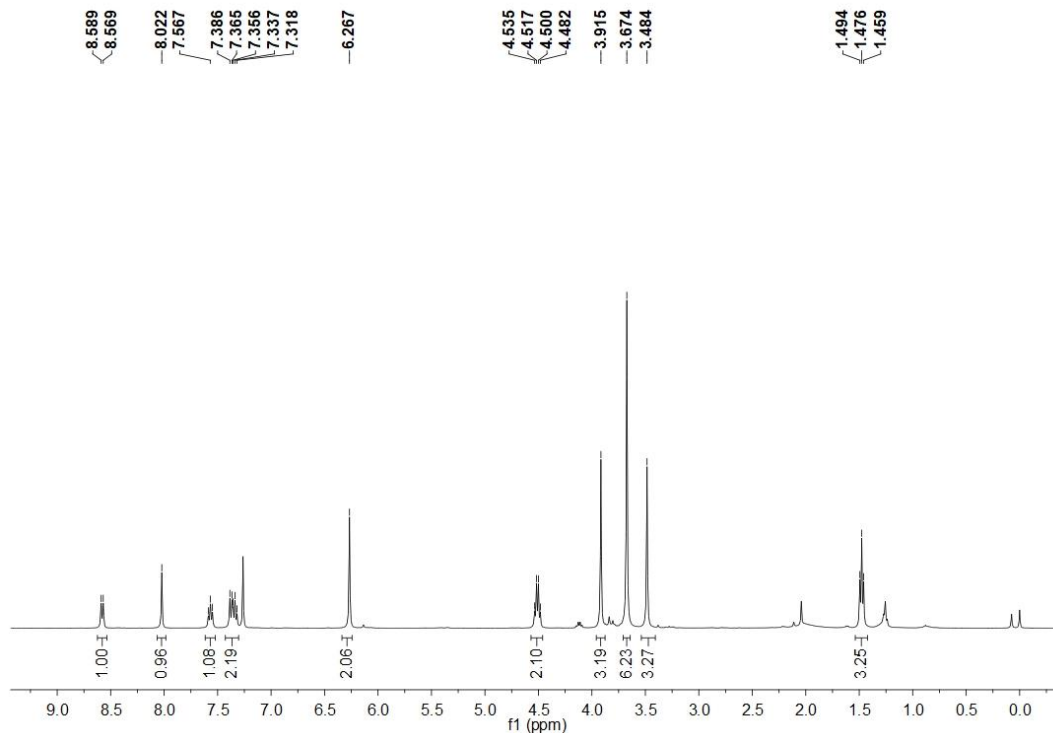

<sup>1</sup>H NMR (400 MHz, Chloroform-d)

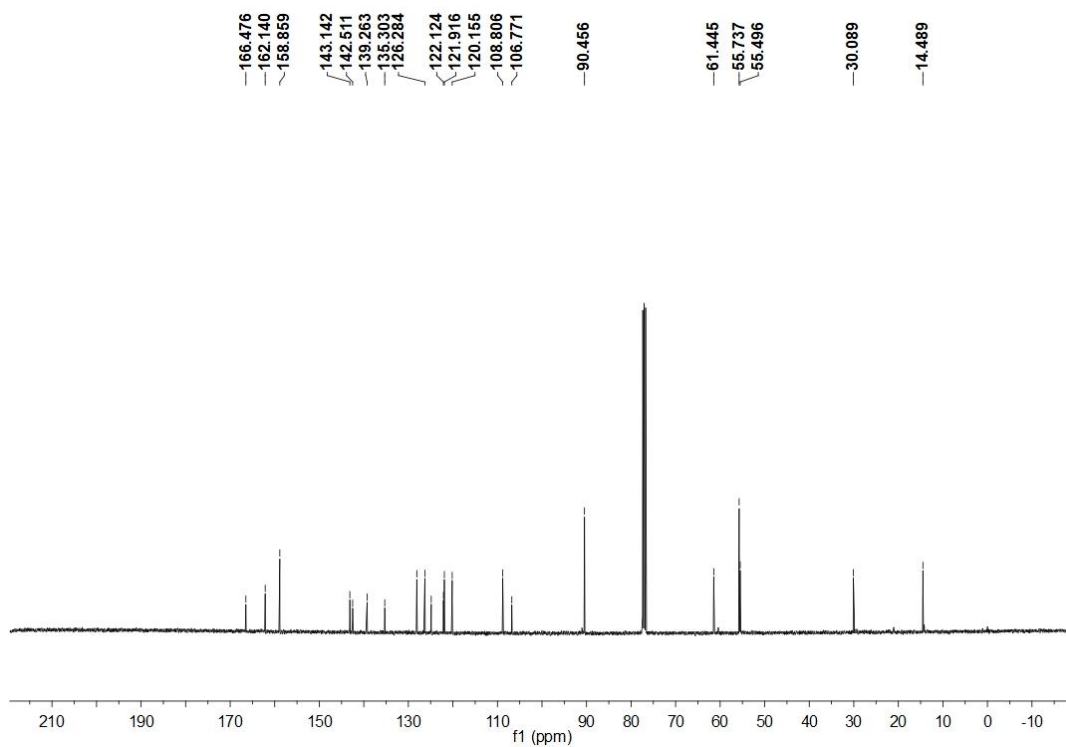

<sup>13</sup>C NMR (101 MHz, Chloroform-d)

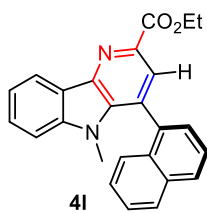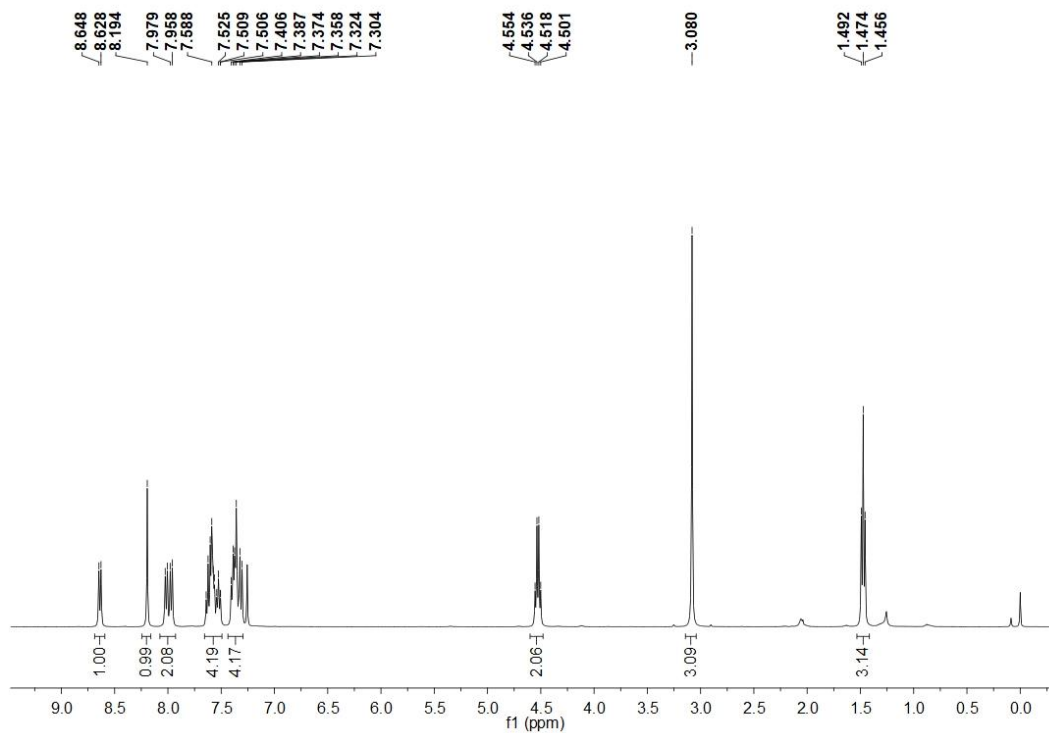

<sup>1</sup>H NMR (400 MHz, Chloroform-d)

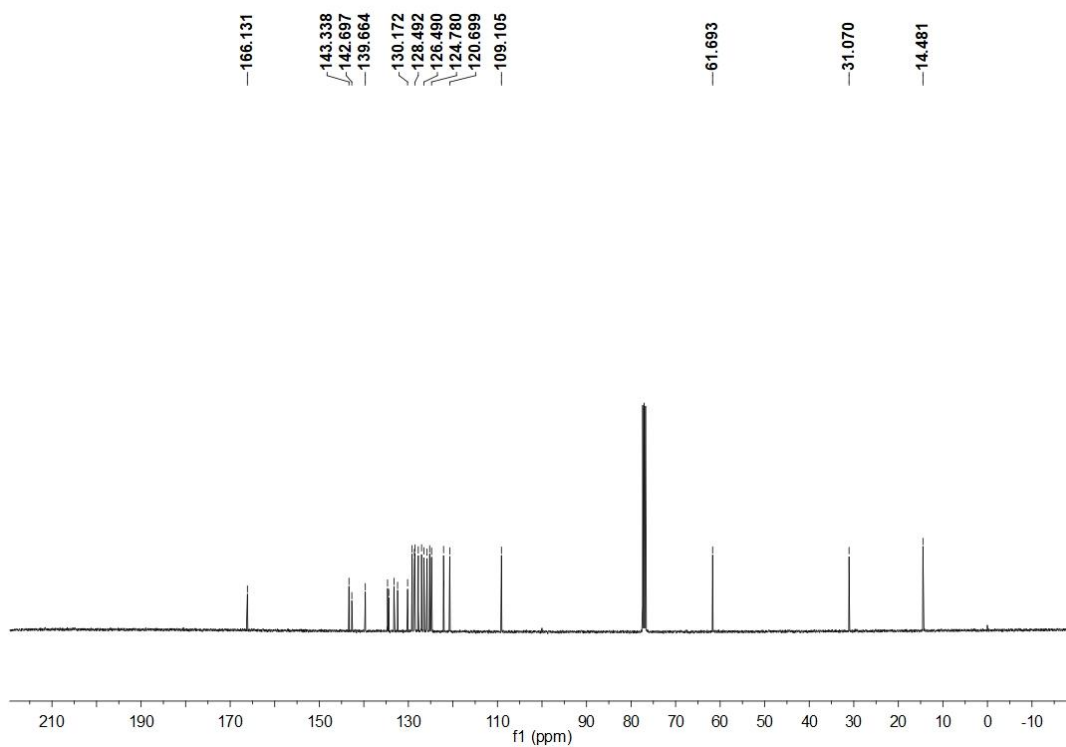

<sup>13</sup>C NMR (101 MHz, Chloroform-d)



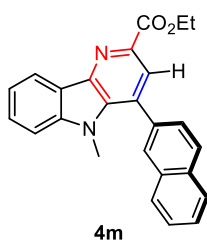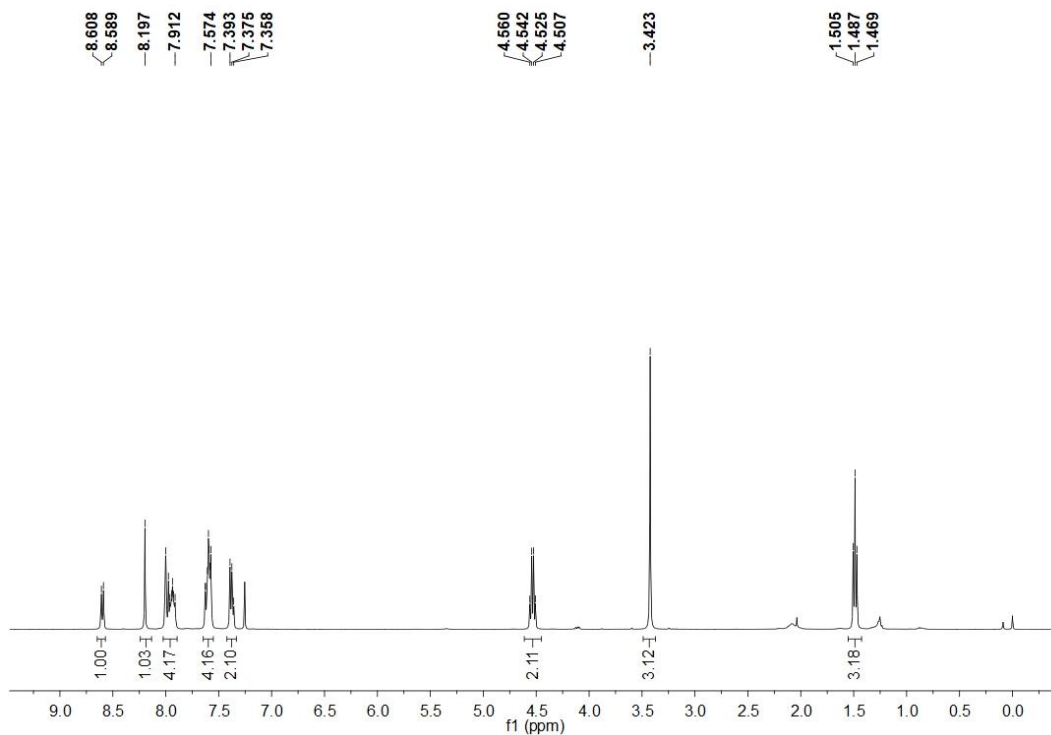

**<sup>1</sup>H NMR (400 MHz, Chloroform-d)**

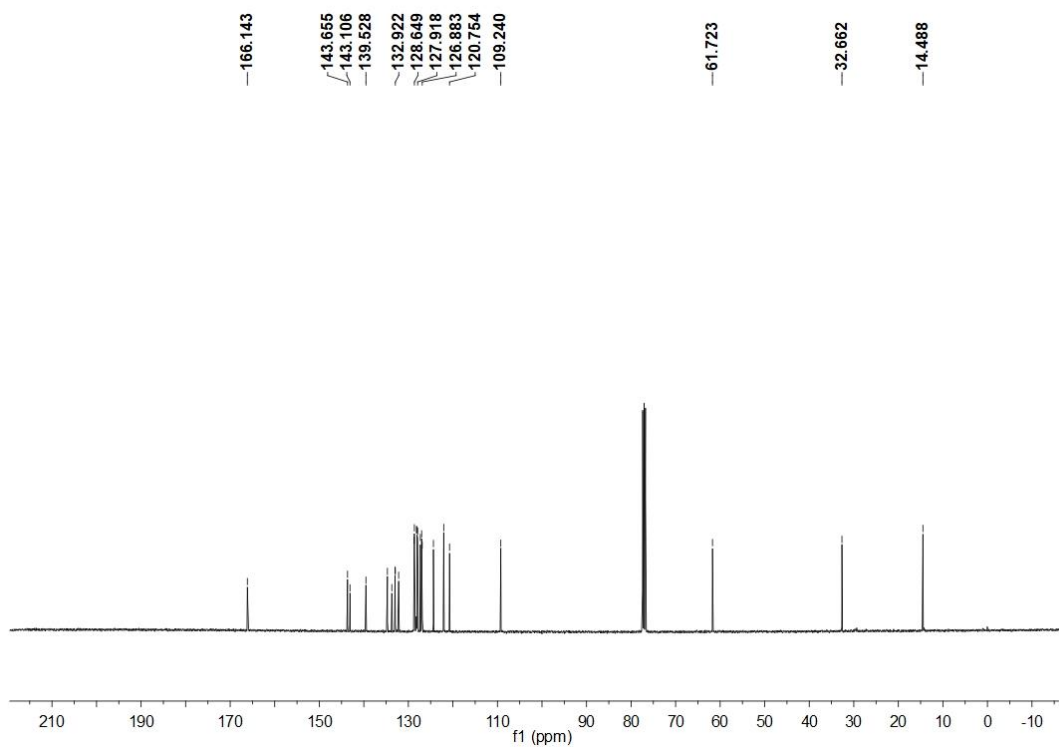

**<sup>13</sup>C NMR (101 MHz, Chloroform-d)**

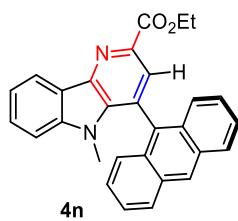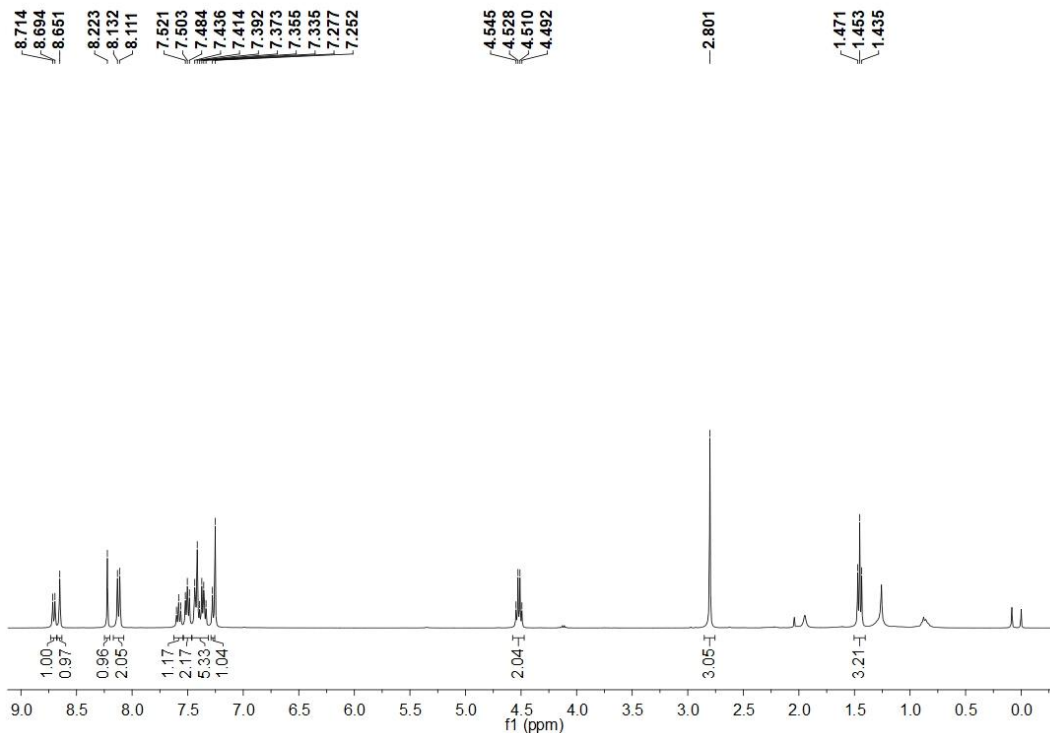

<sup>1</sup>H NMR (400 MHz, Chloroform-d)

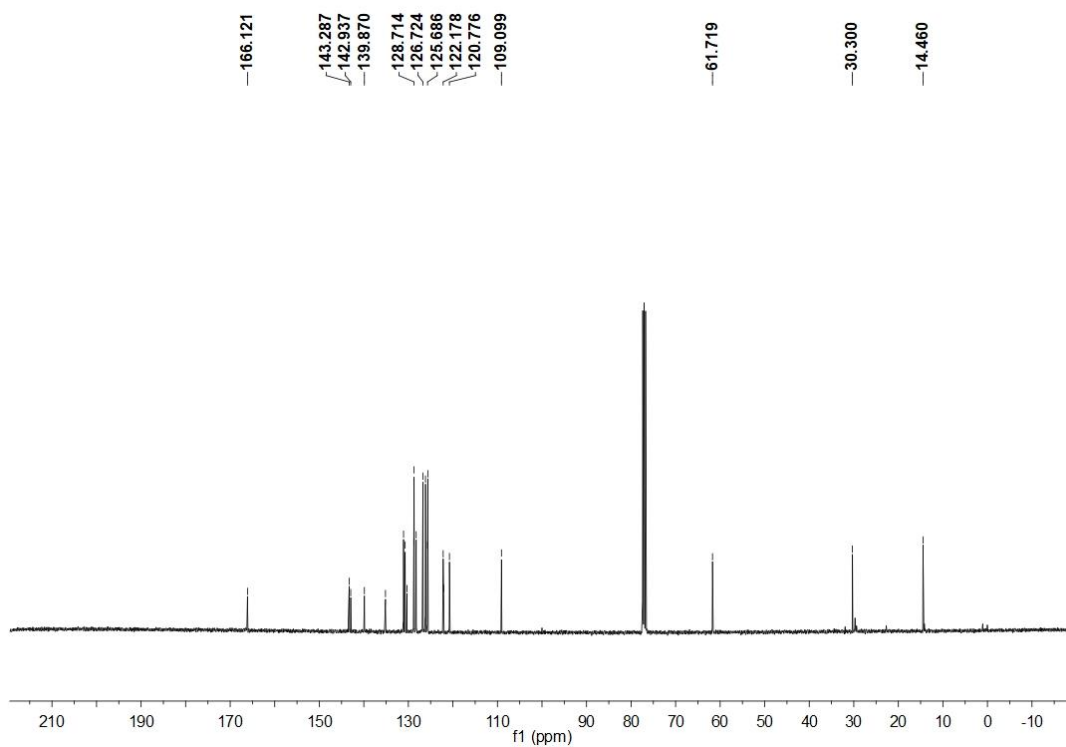

<sup>13</sup>C NMR (101 MHz, Chloroform-d)

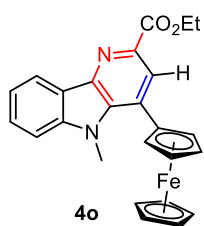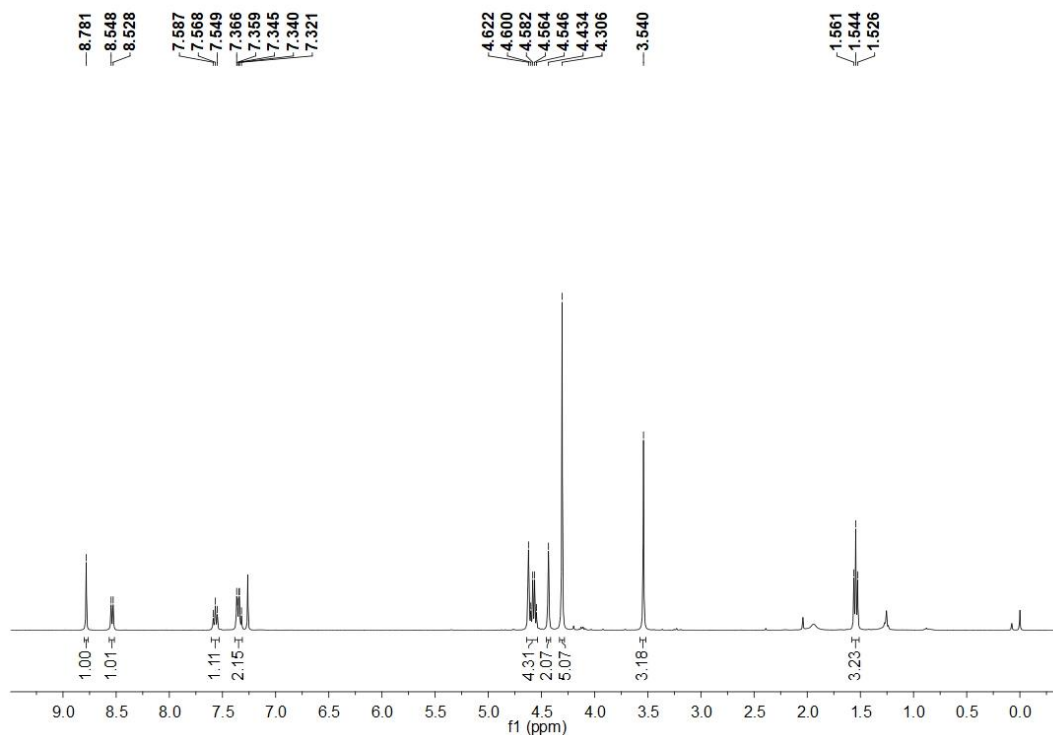

<sup>1</sup>H NMR (400 MHz, Chloroform-d)

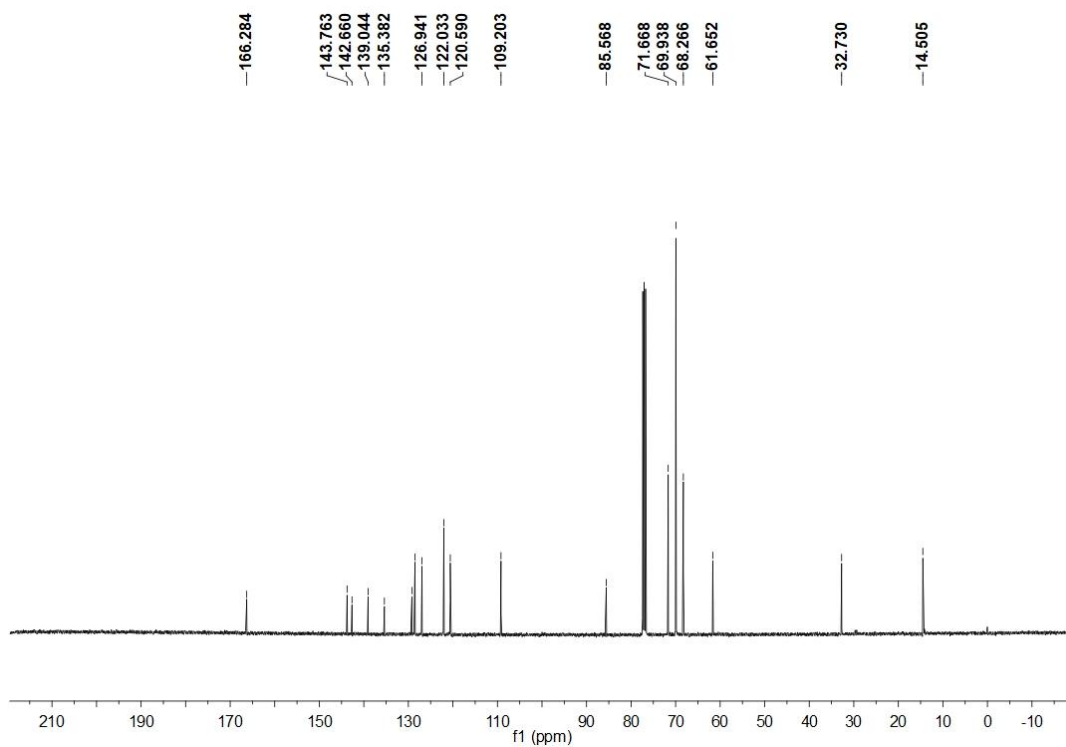

<sup>13</sup>C NMR (101 MHz, Chloroform-d)

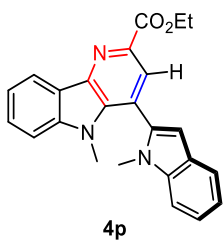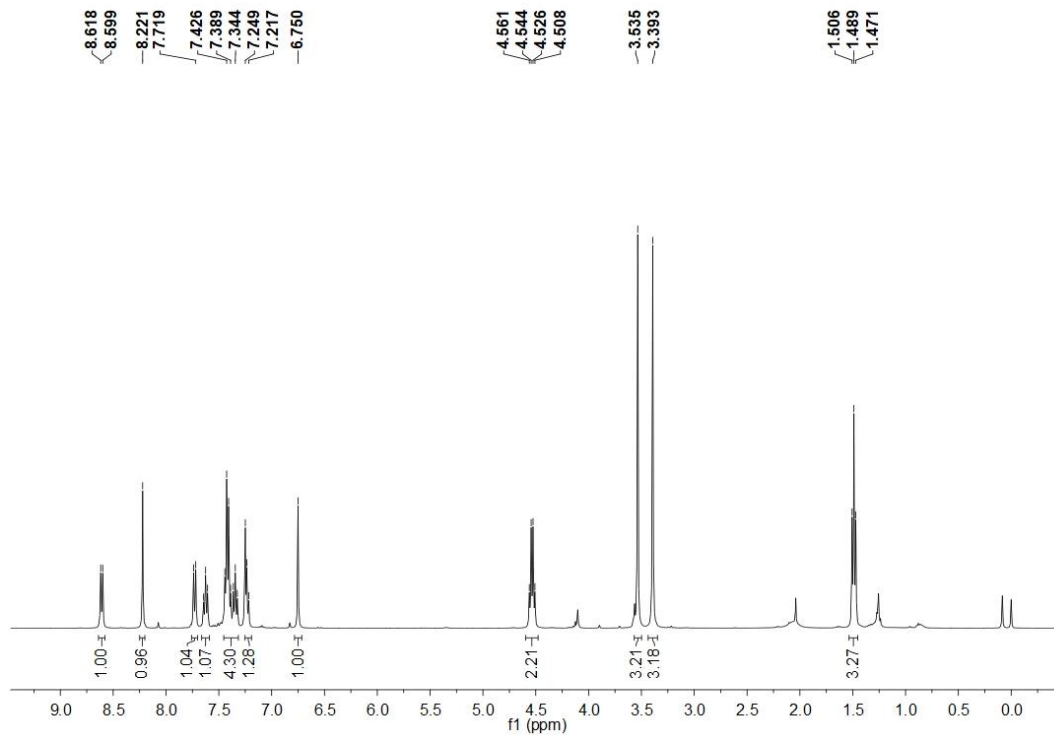

<sup>1</sup>H NMR (400 MHz, Chloroform-d)

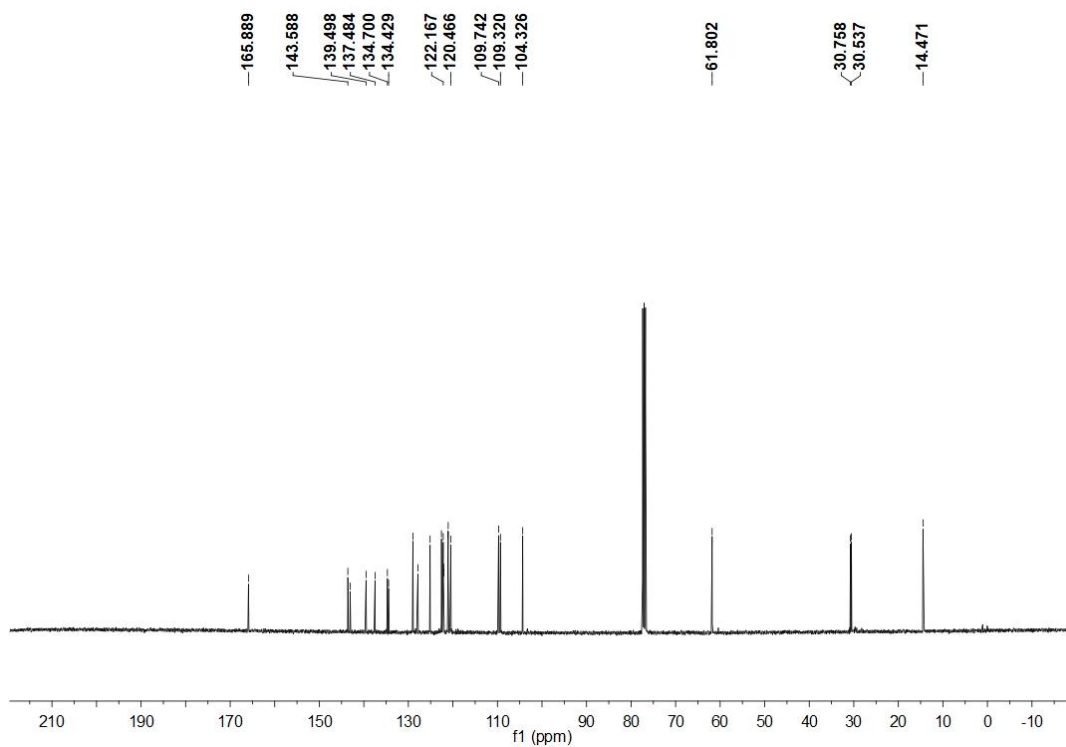

<sup>13</sup>C NMR (101 MHz, Chloroform-d)

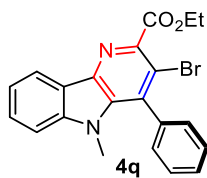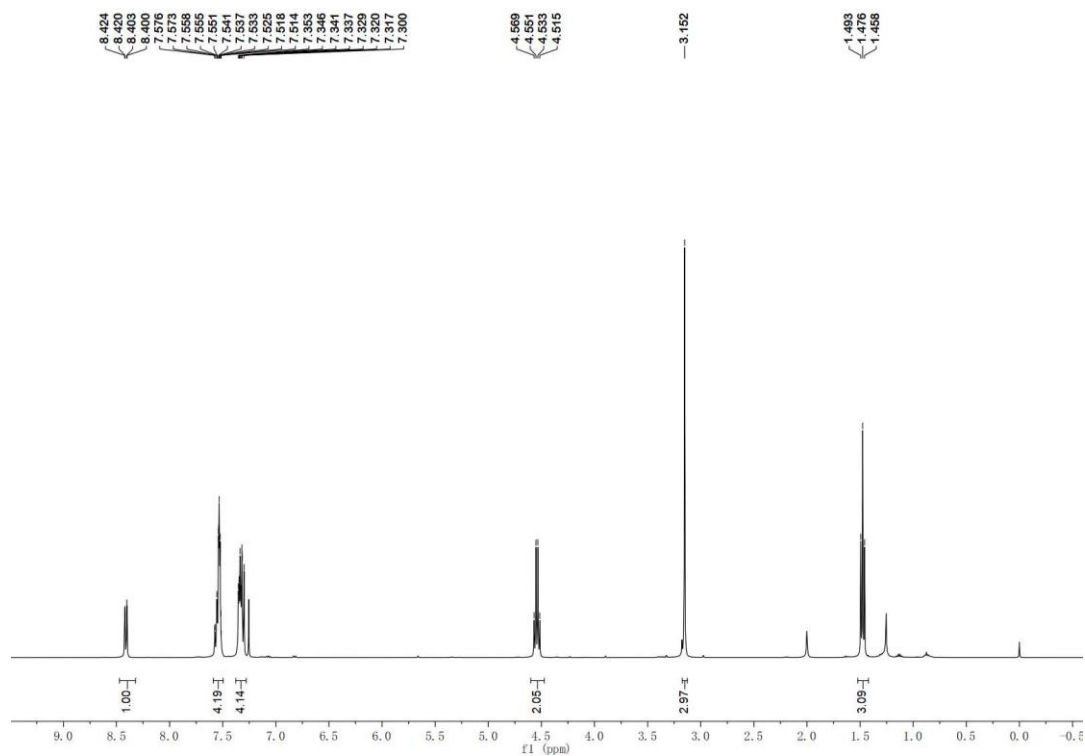

<sup>1</sup>H NMR (400 MHz, Chloroform-d)

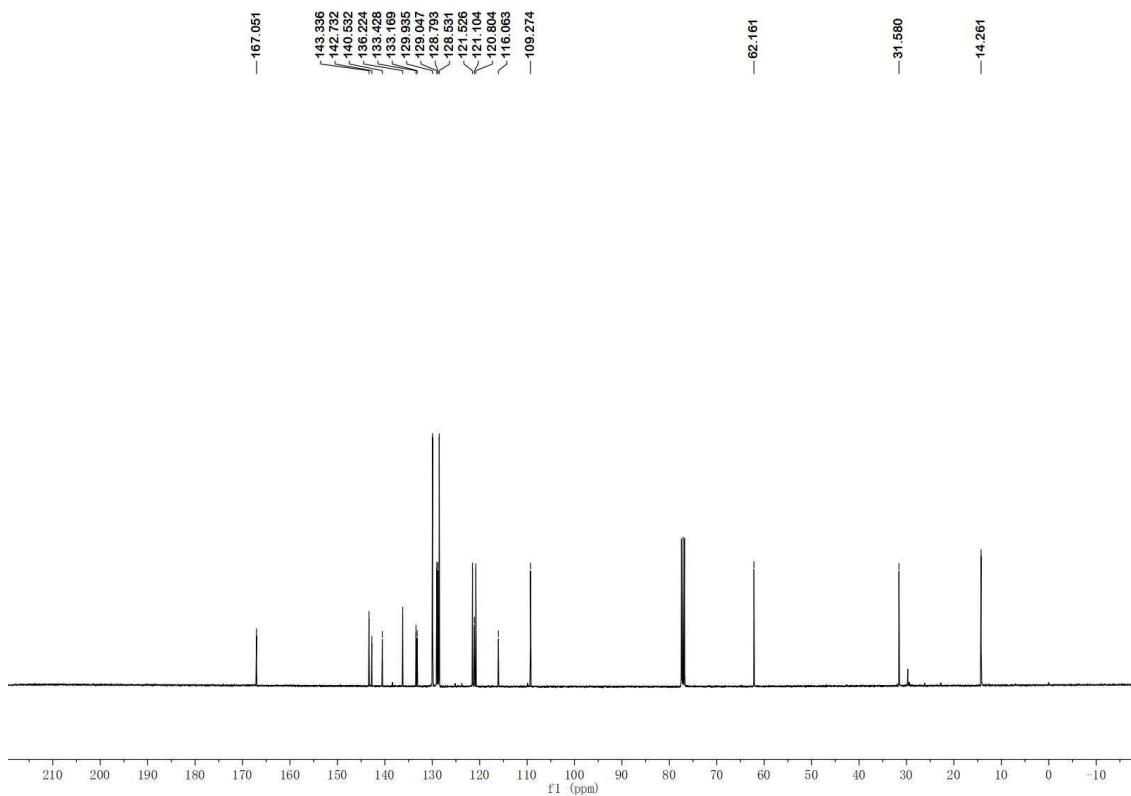

<sup>13</sup>C NMR (101 MHz, Chloroform-d)

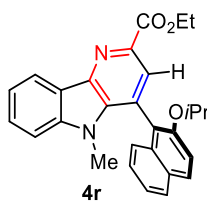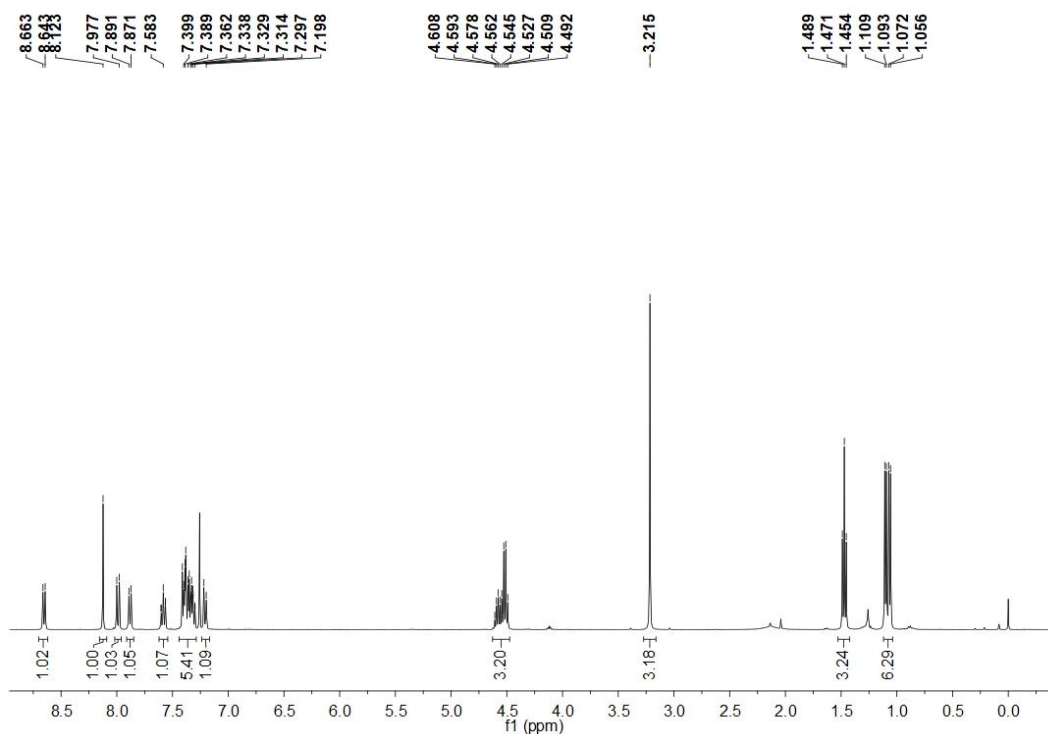

<sup>1</sup>H NMR (400 MHz, Chloroform-d)

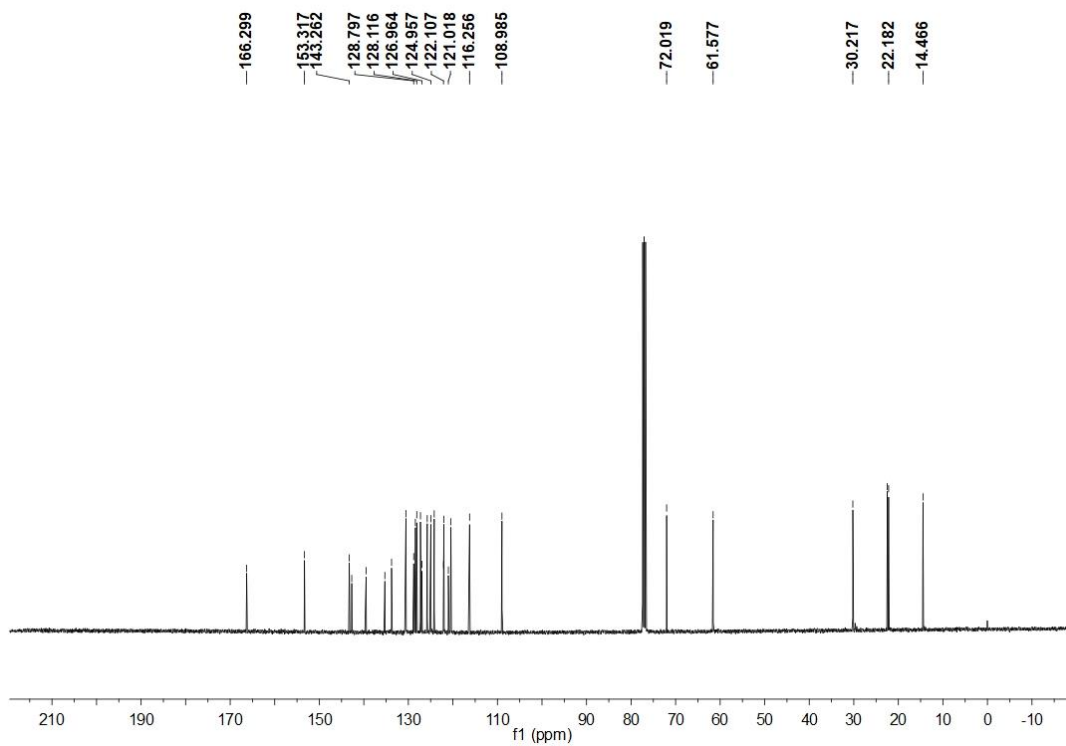

<sup>13</sup>C NMR (101 MHz, Chloroform-d)

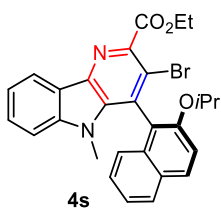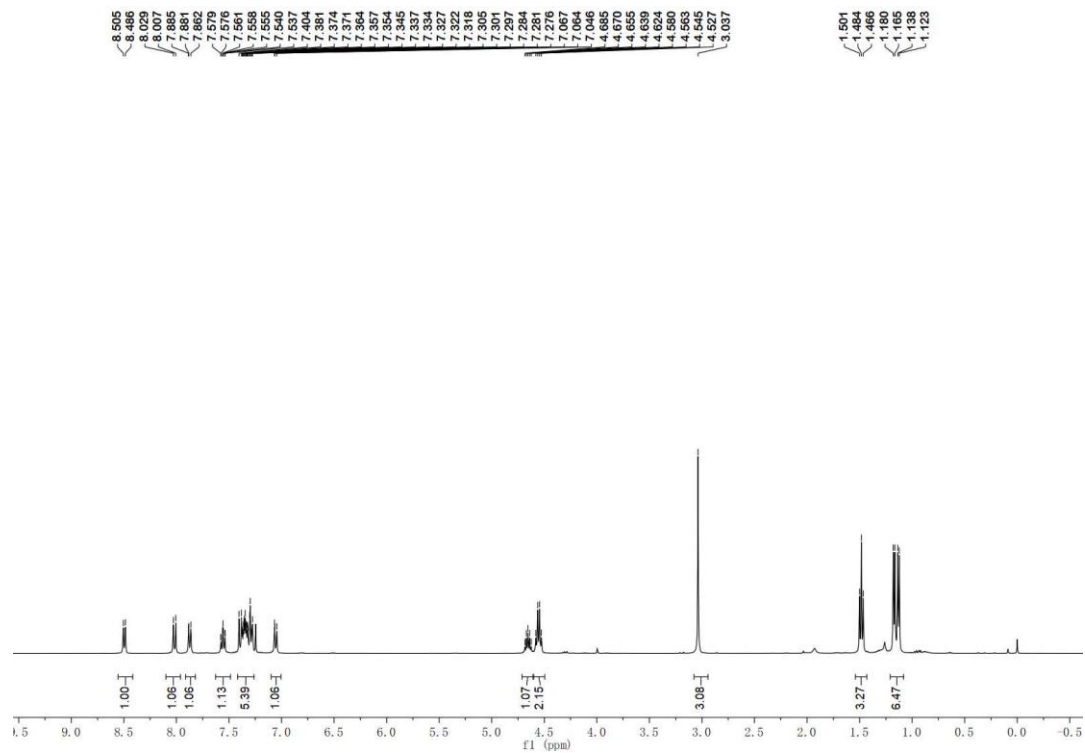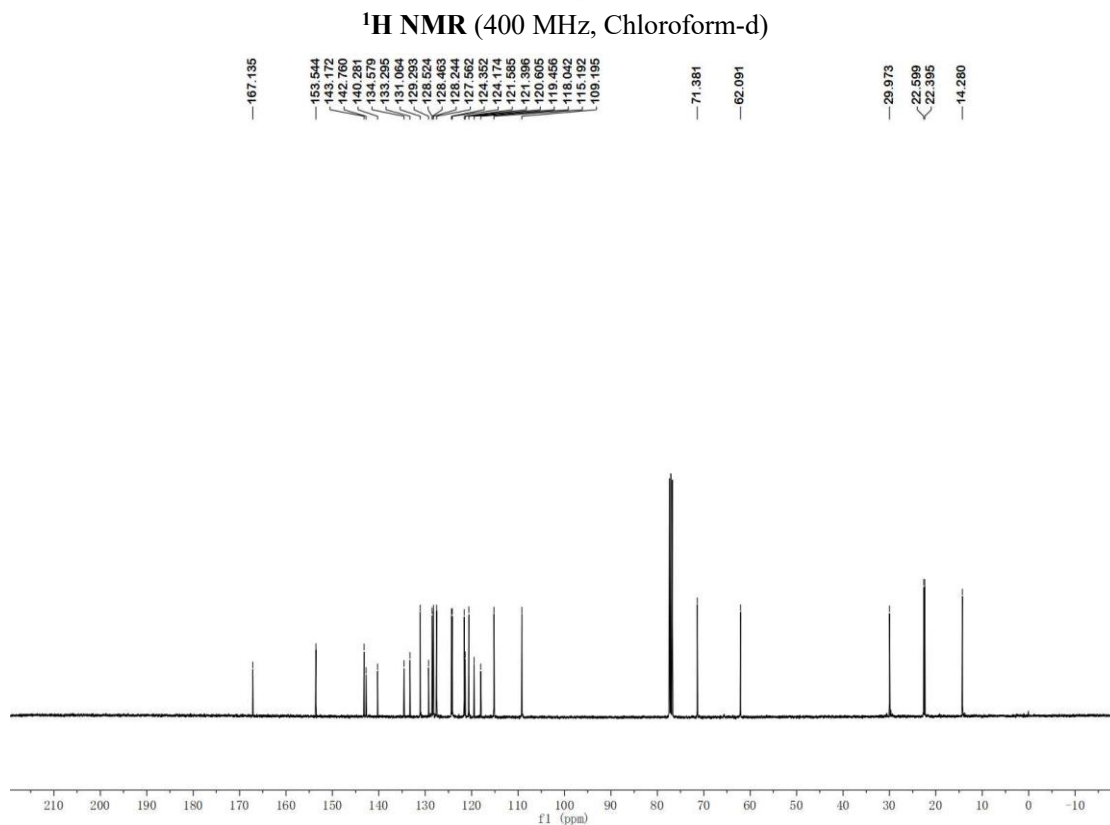

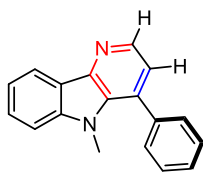

4t

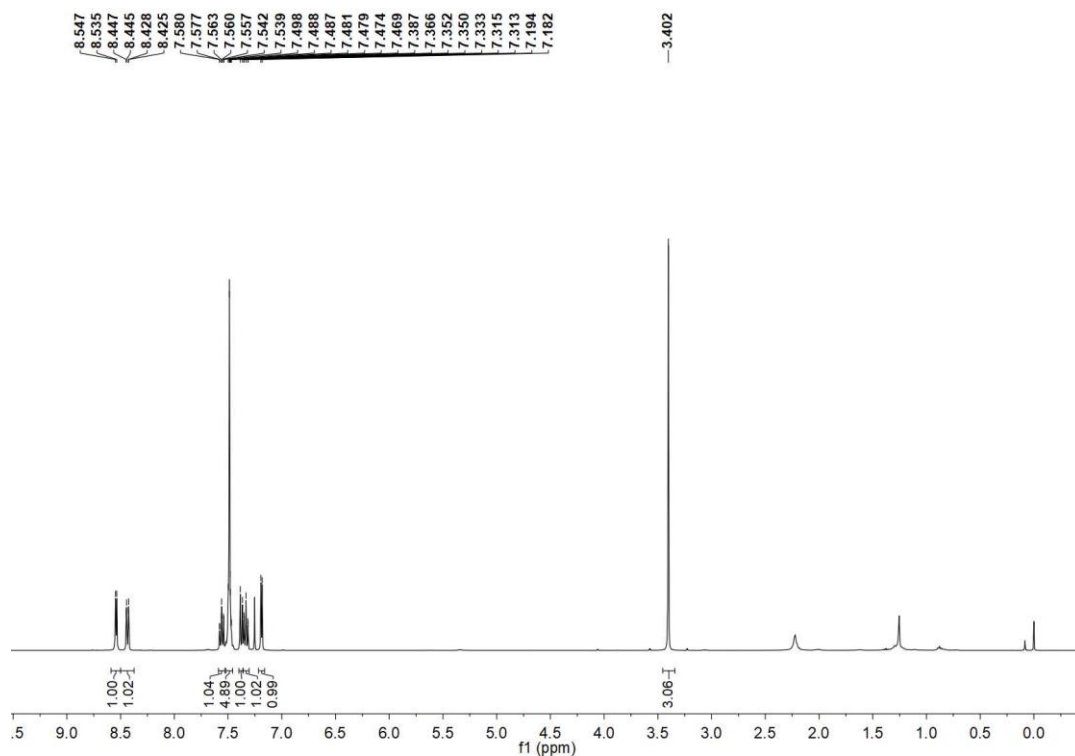

<sup>1</sup>H NMR (400 MHz, Chloroform-d)

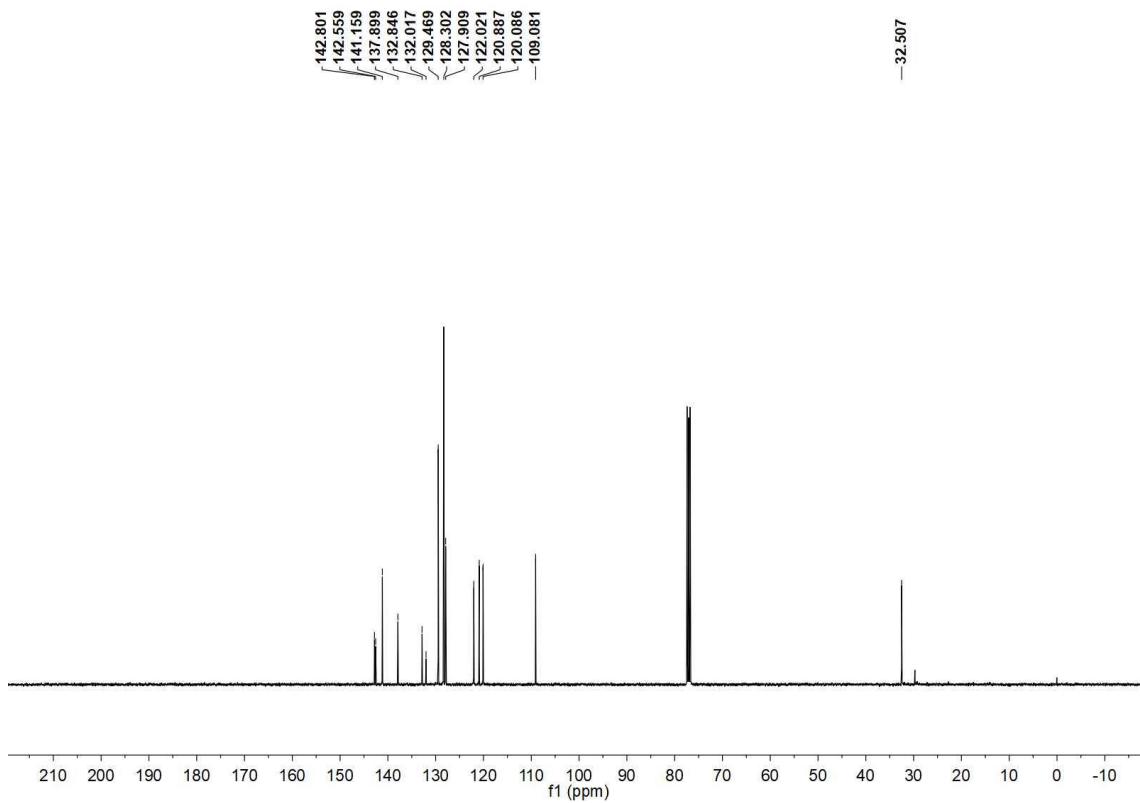

<sup>13</sup>C NMR (101 MHz, Chloroform-d)



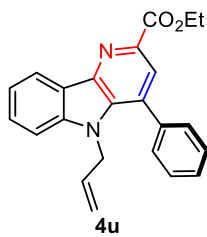

<sup>1</sup>H NMR (400 MHz, Chloroform-d) peaks (ppm): 8.606, 8.567, 8.070, 7.568, 7.569, 7.549, 7.508, 7.487, 7.489, 7.468, 7.460, 7.394, 7.377, 7.357, 7.263, 5.635, 5.622, 5.609, 5.603, 5.597, 5.592, 5.579, 5.565, 5.024, 4.998, 4.635, 4.592, 4.566, 4.558, 4.552, 4.511, 4.503, 1.503, 1.485, 1.467.

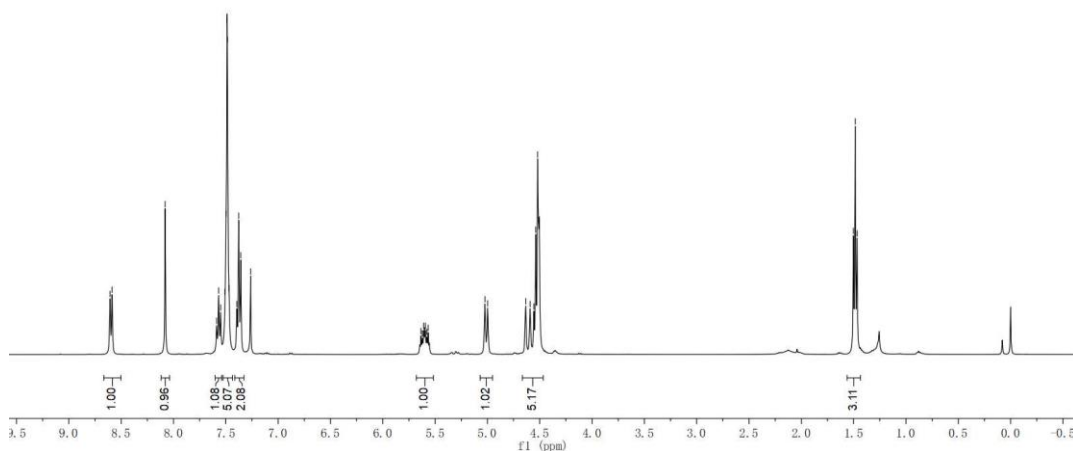

**<sup>1</sup>H NMR (400 MHz, Chloroform-d)**

<sup>13</sup>C NMR (101 MHz, Chloroform-d) peaks (ppm): 166.093, 143.284, 143.092, 139.697, 137.178, 132.986, 132.985, 131.995, 129.725, 128.683, 128.339, 124.336, 122.309, 122.092, 120.610, 117.694, 110.007, 61.696, 46.793, 14.475.

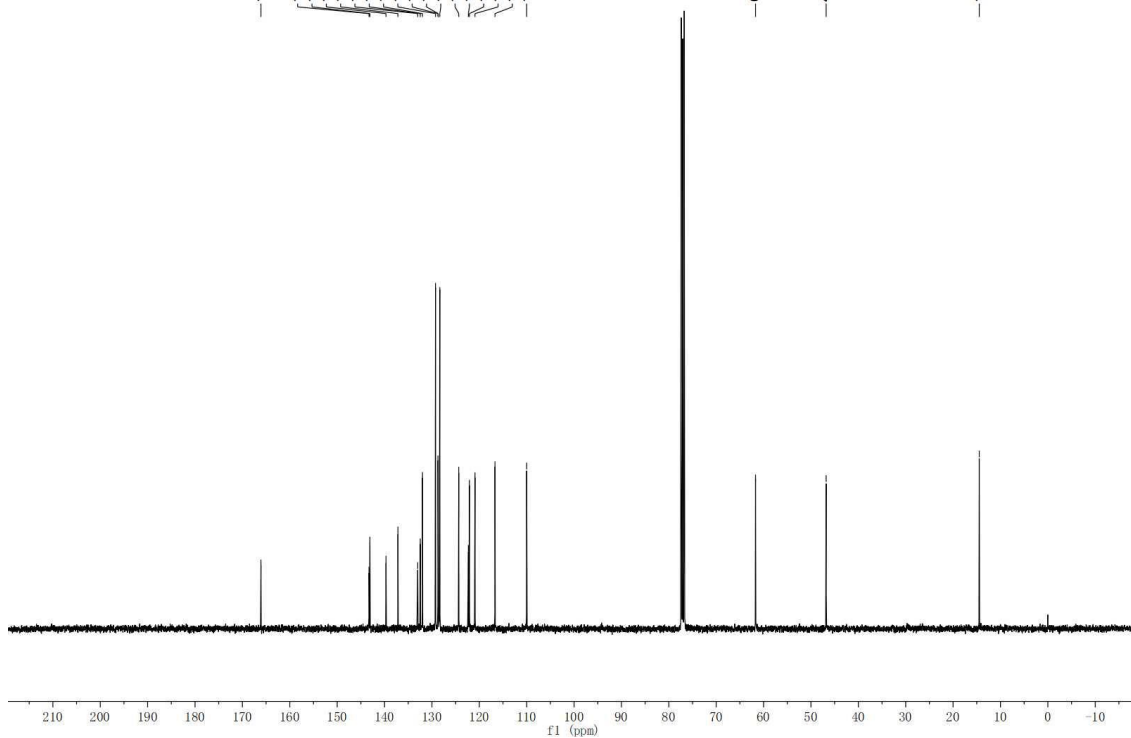

**<sup>13</sup>C NMR (101 MHz, Chloroform-d)**



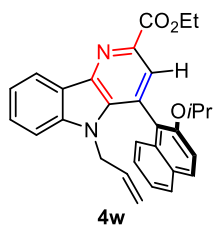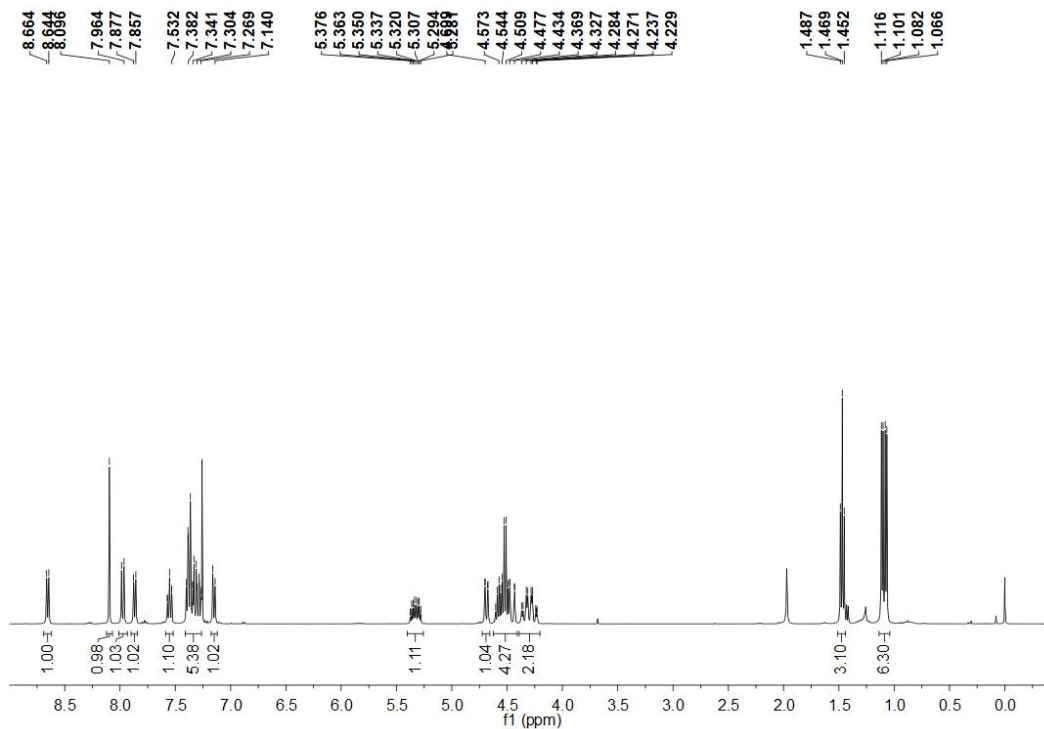

**<sup>1</sup>H NMR (400 MHz, Chloroform-d)**

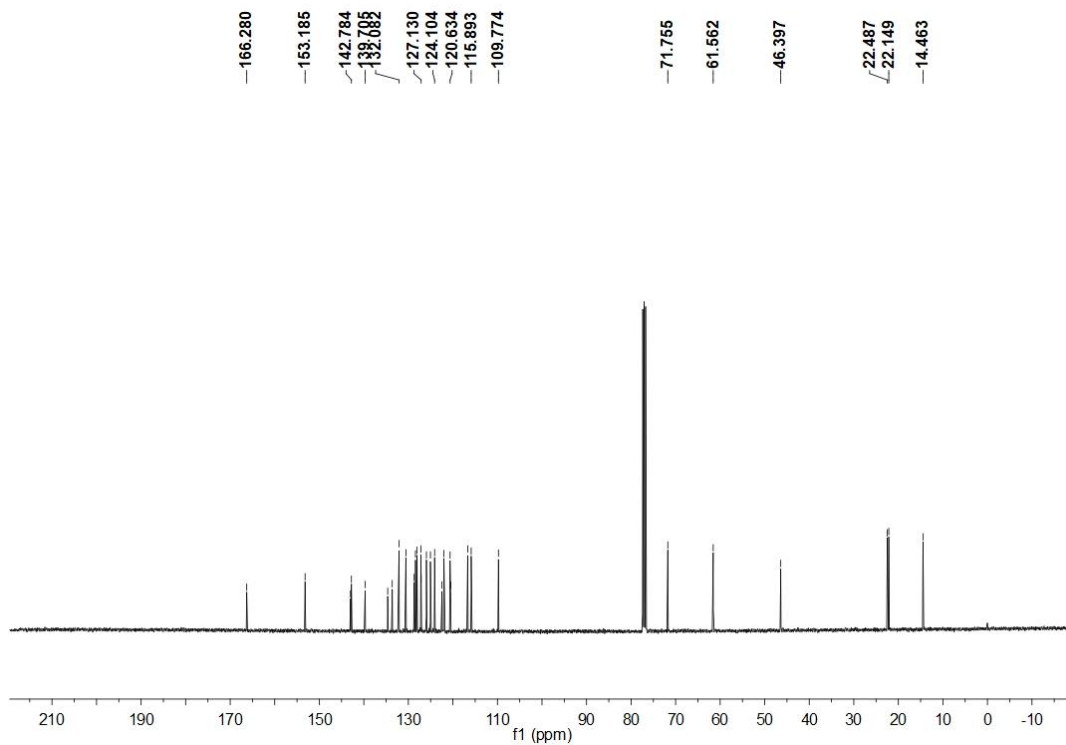

**<sup>13</sup>C NMR (101 MHz, Chloroform-d)**

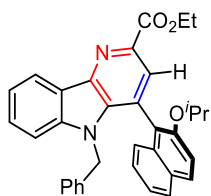

4x

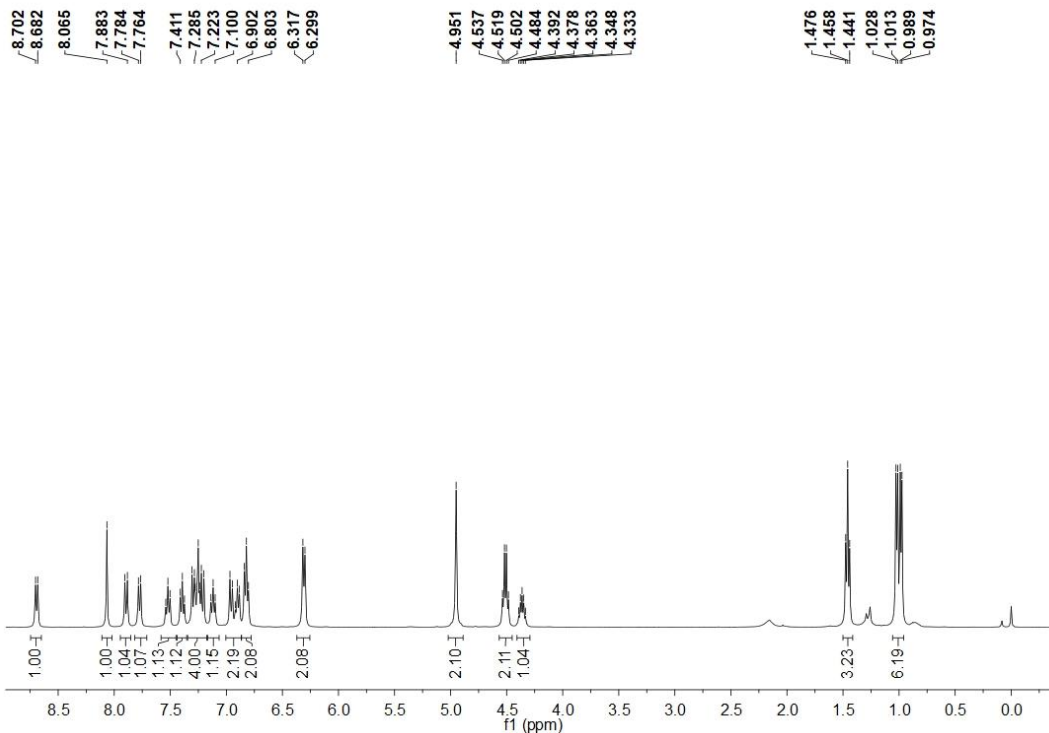

<sup>1</sup>H NMR (400 MHz, Chloroform-d)

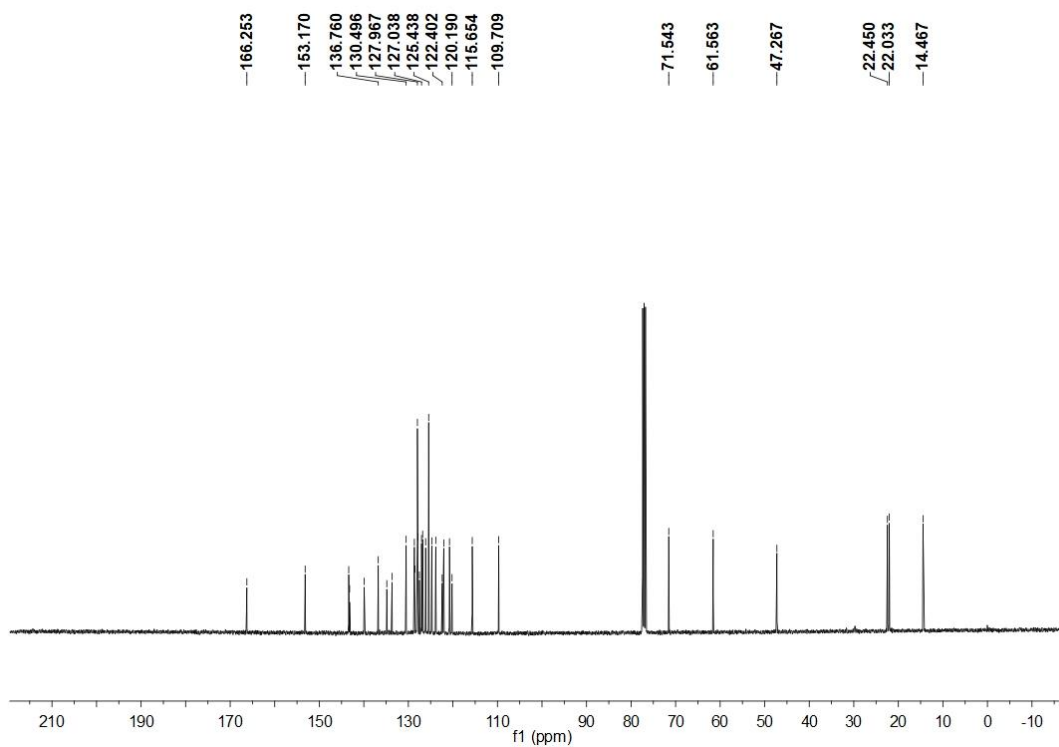

<sup>13</sup>C NMR (101 MHz, Chloroform-d)

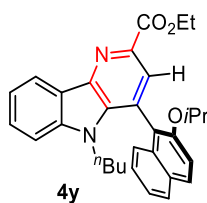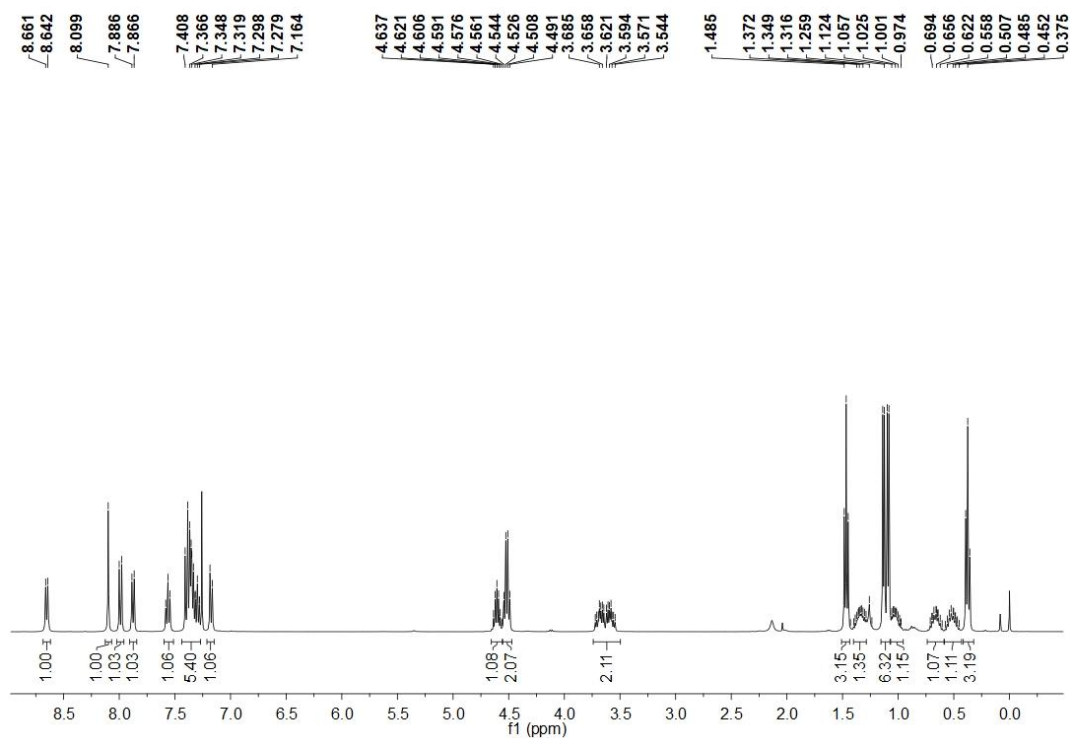

**<sup>1</sup>H NMR (400 MHz, Chloroform-d)**

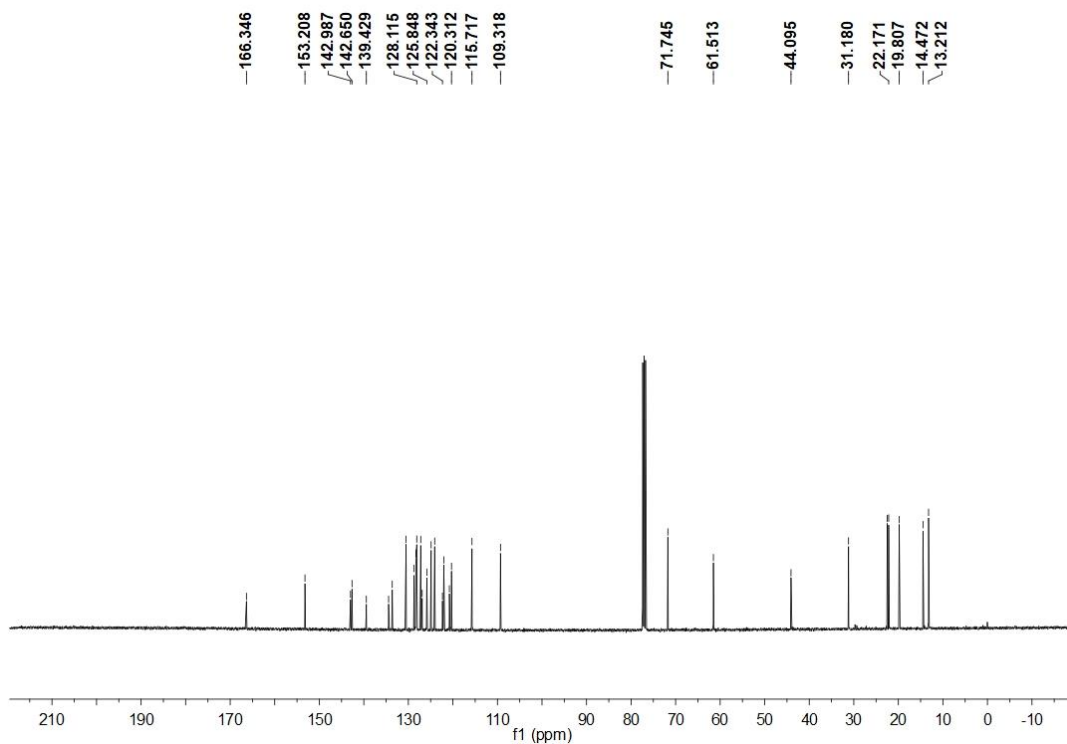

**<sup>13</sup>C NMR (101 MHz, Chloroform-d)**

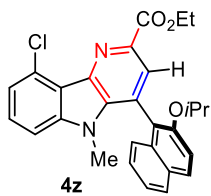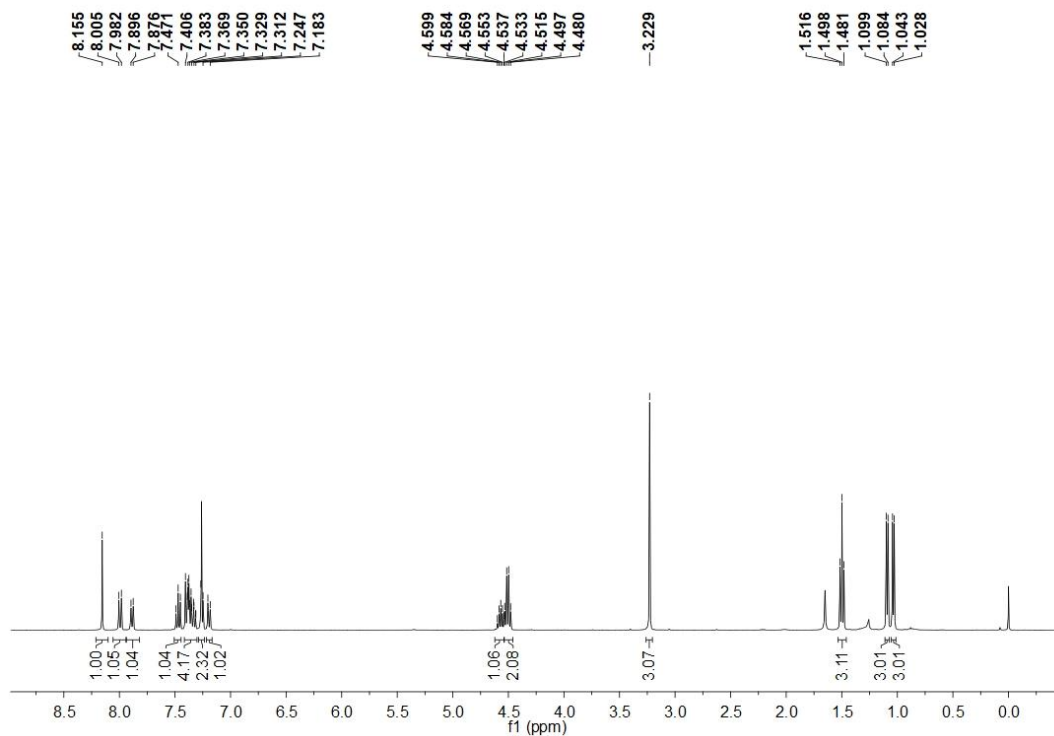

<sup>1</sup>H NMR (400 MHz, Chloroform-d)

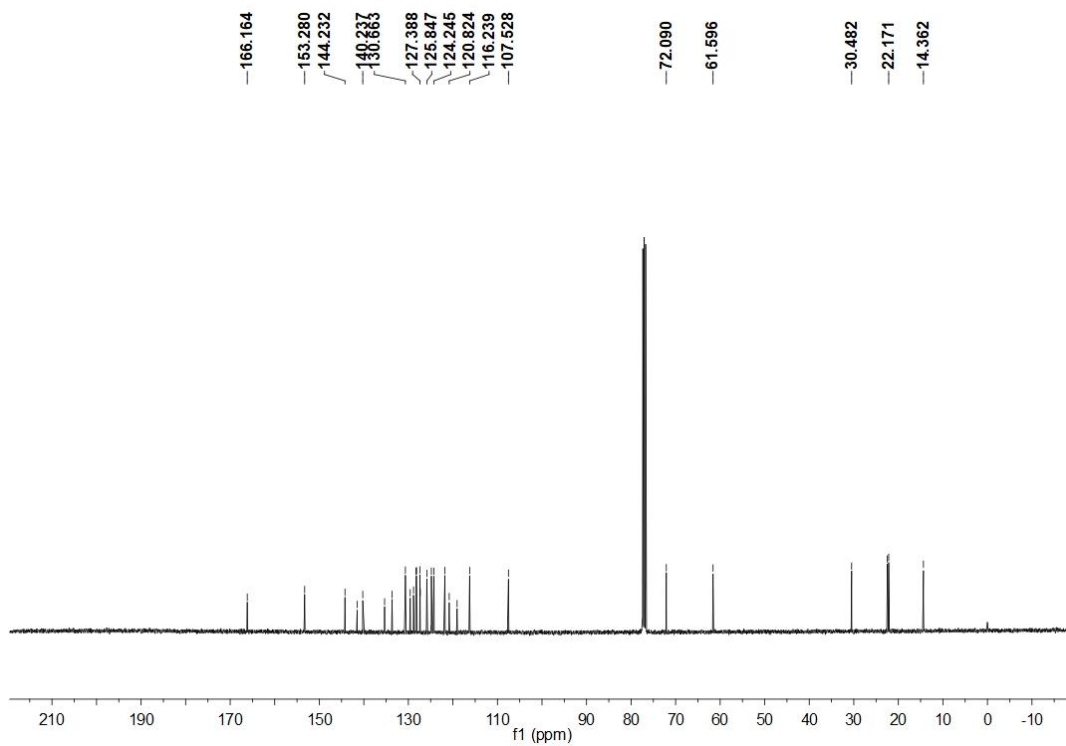

<sup>13</sup>C NMR (101 MHz, Chloroform-d)

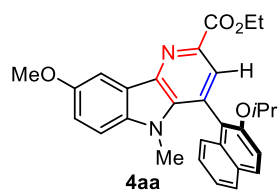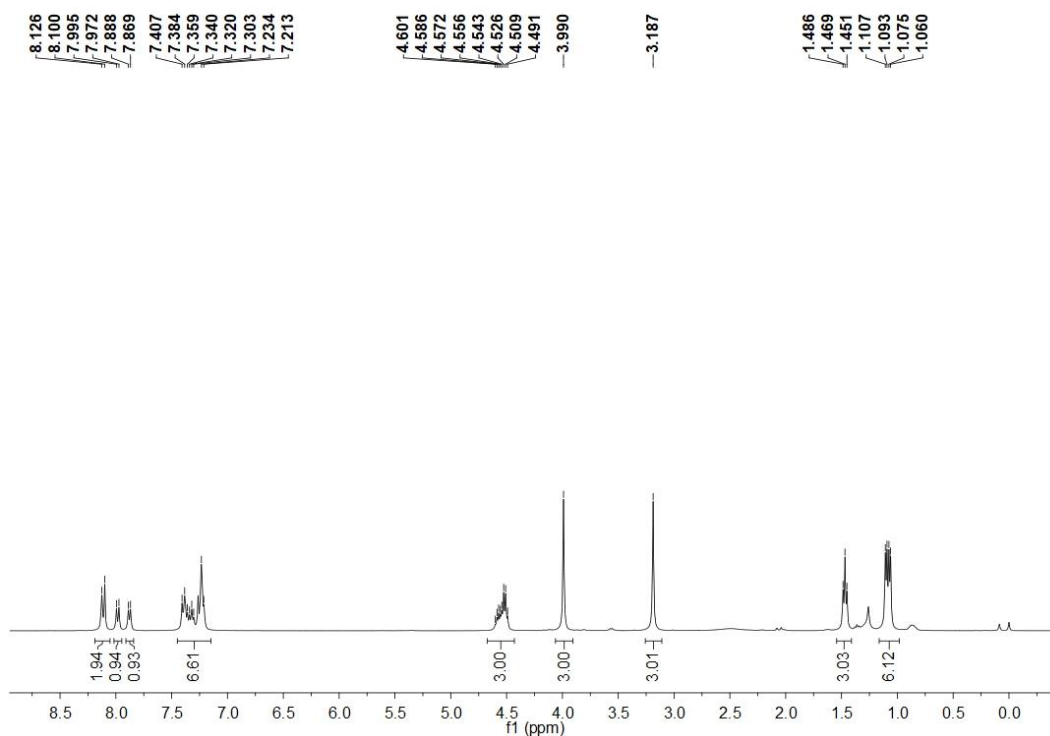

<sup>1</sup>H NMR (400 MHz, Chloroform-d)

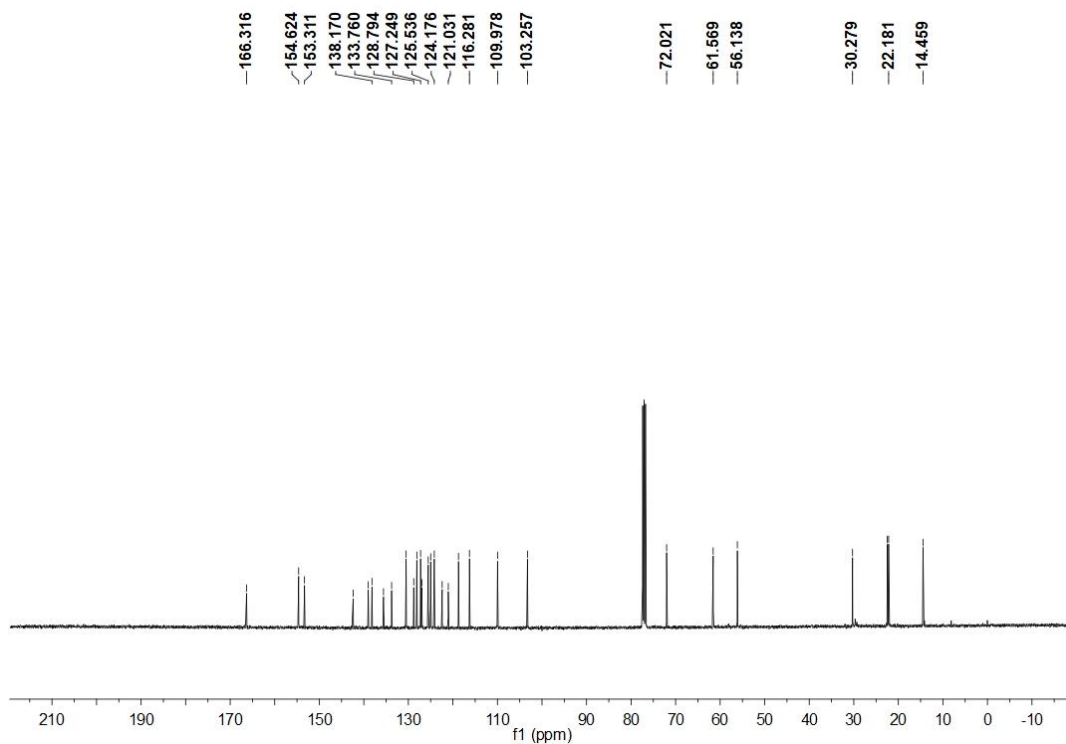

<sup>13</sup>C NMR (101 MHz, Chloroform-d)

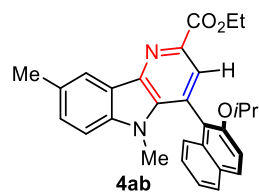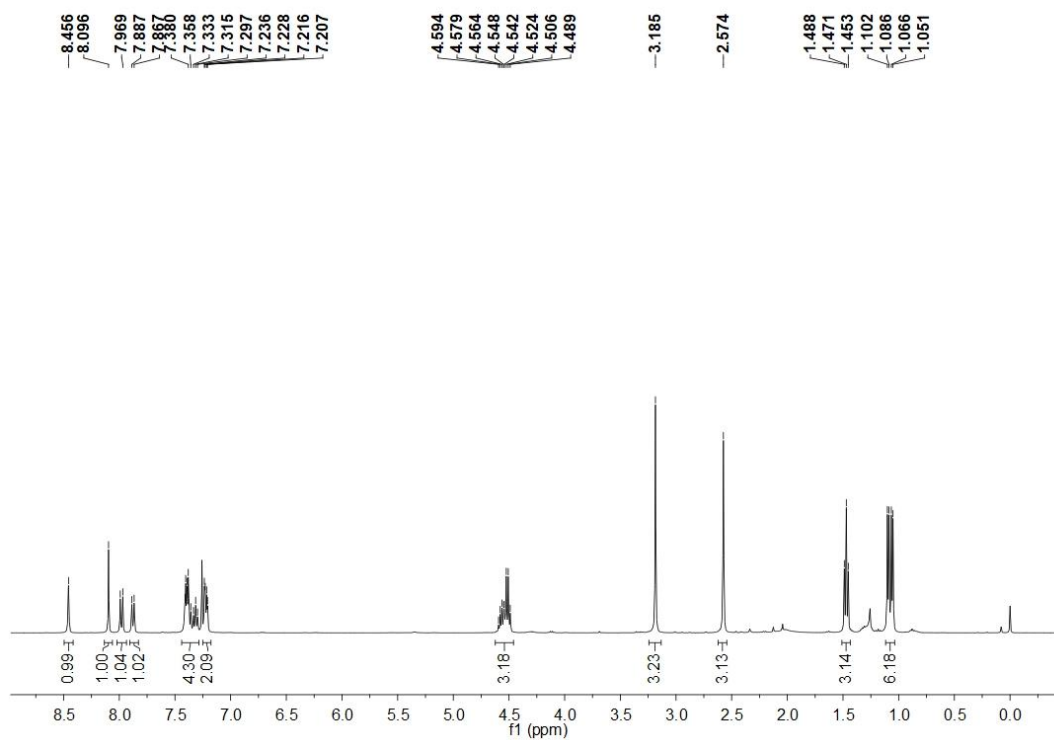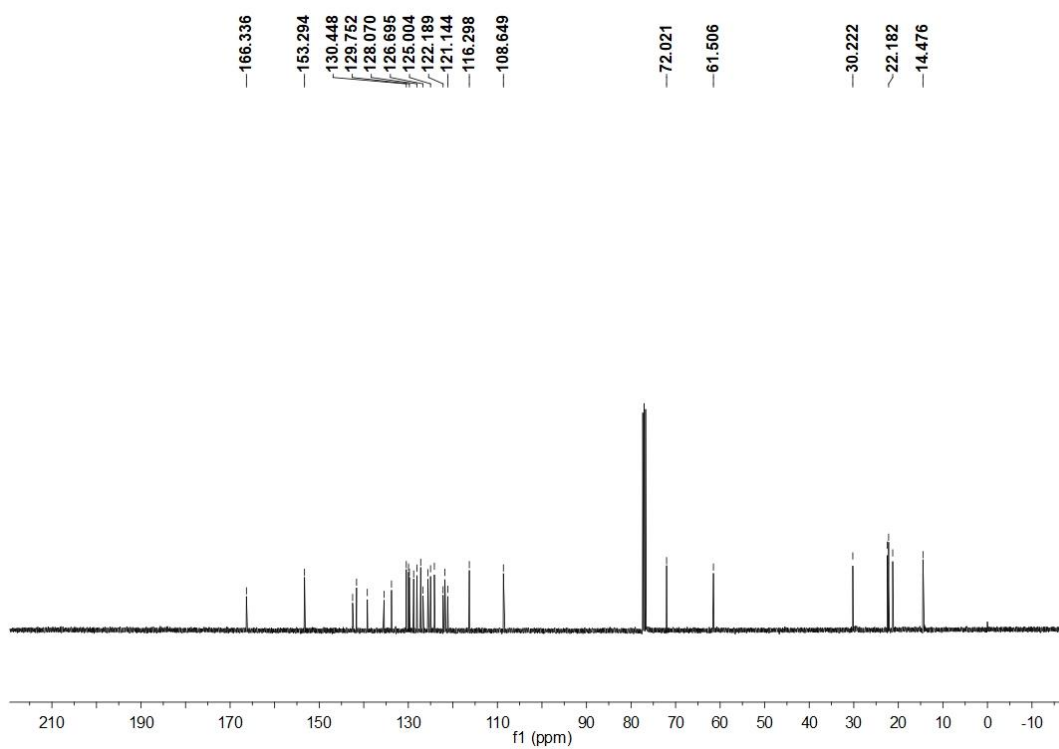



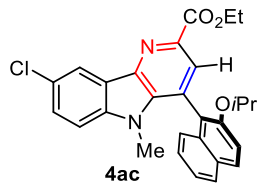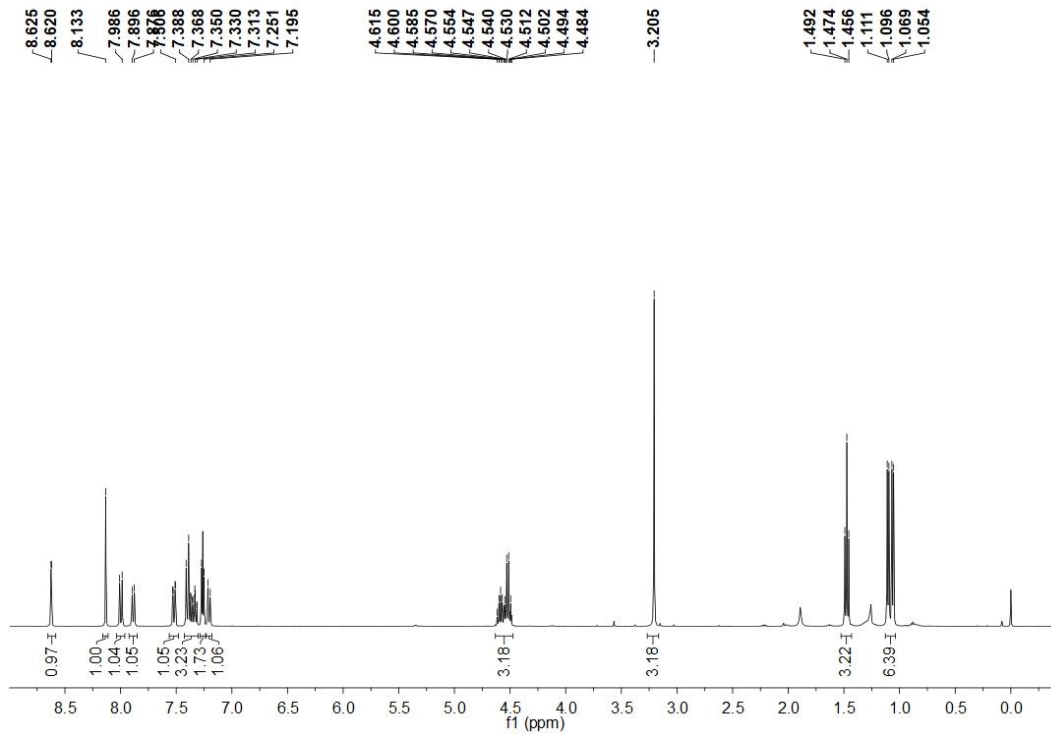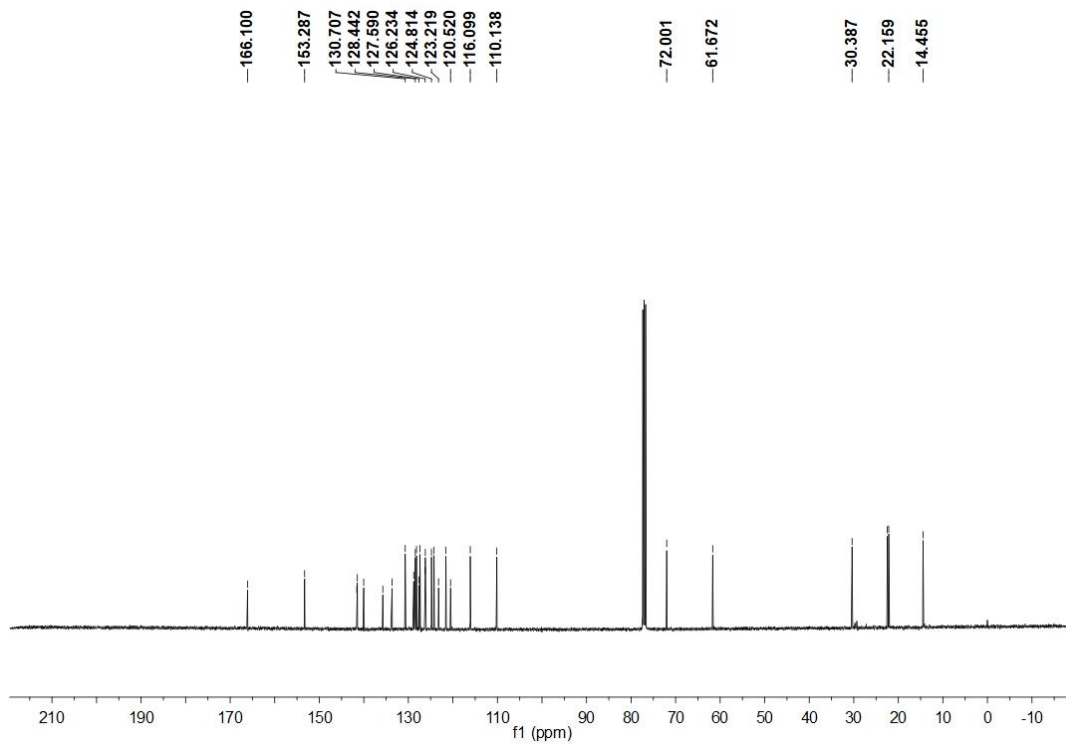

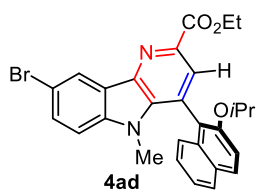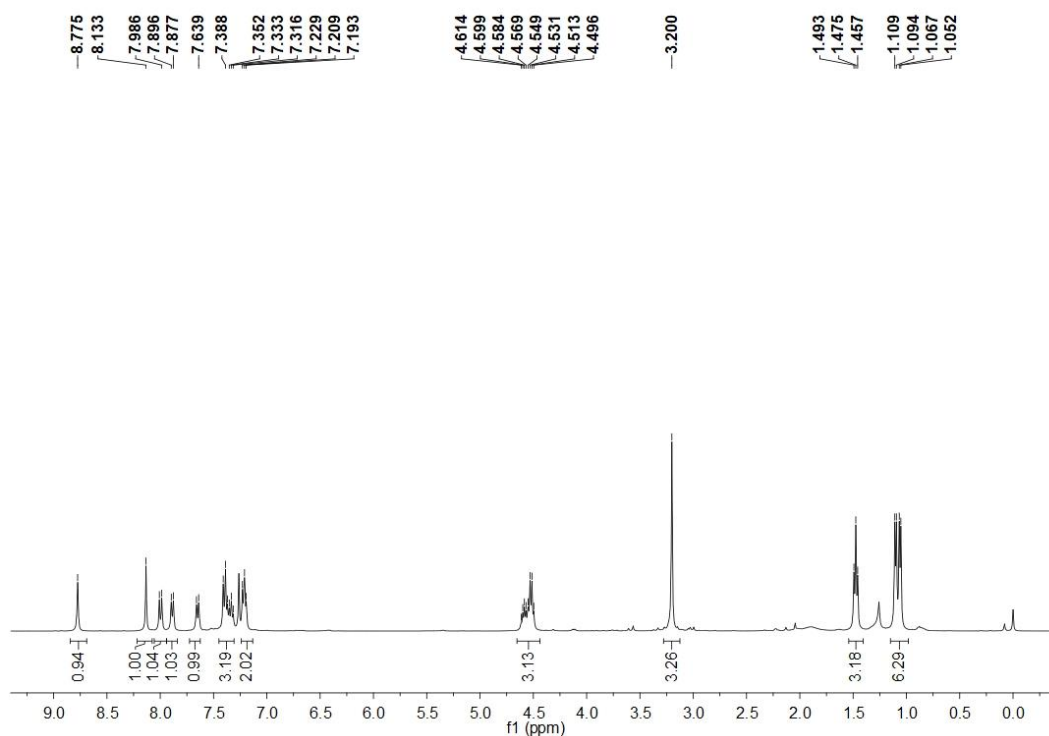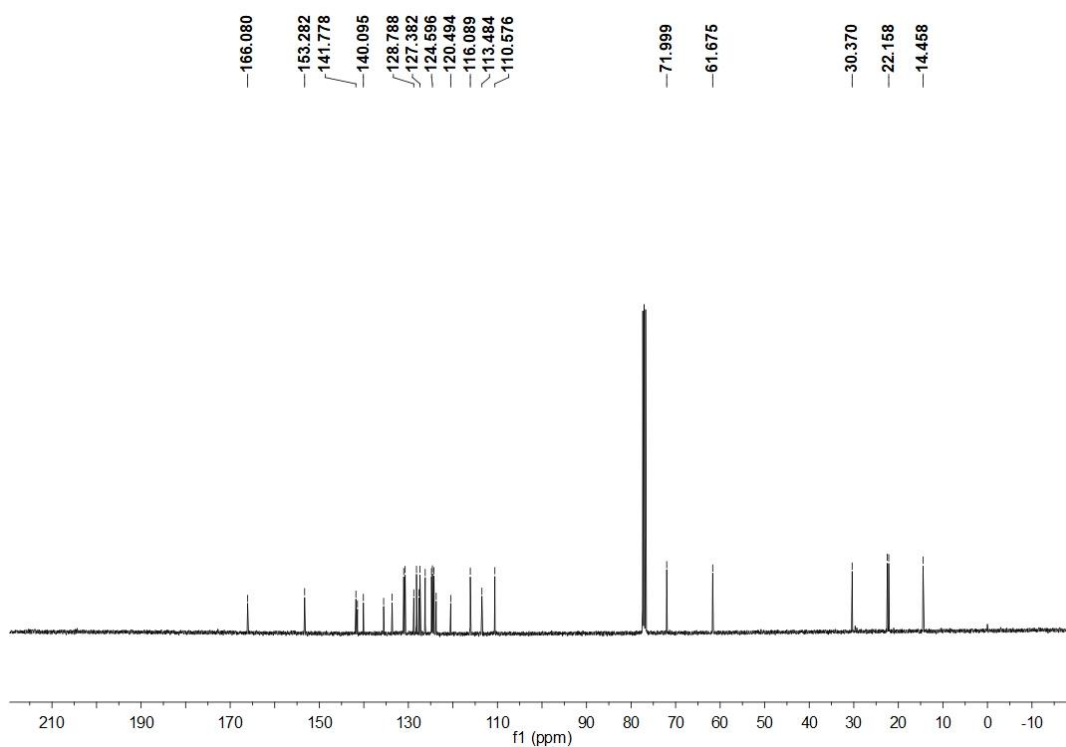

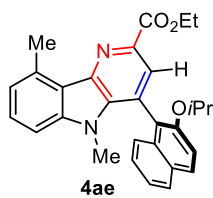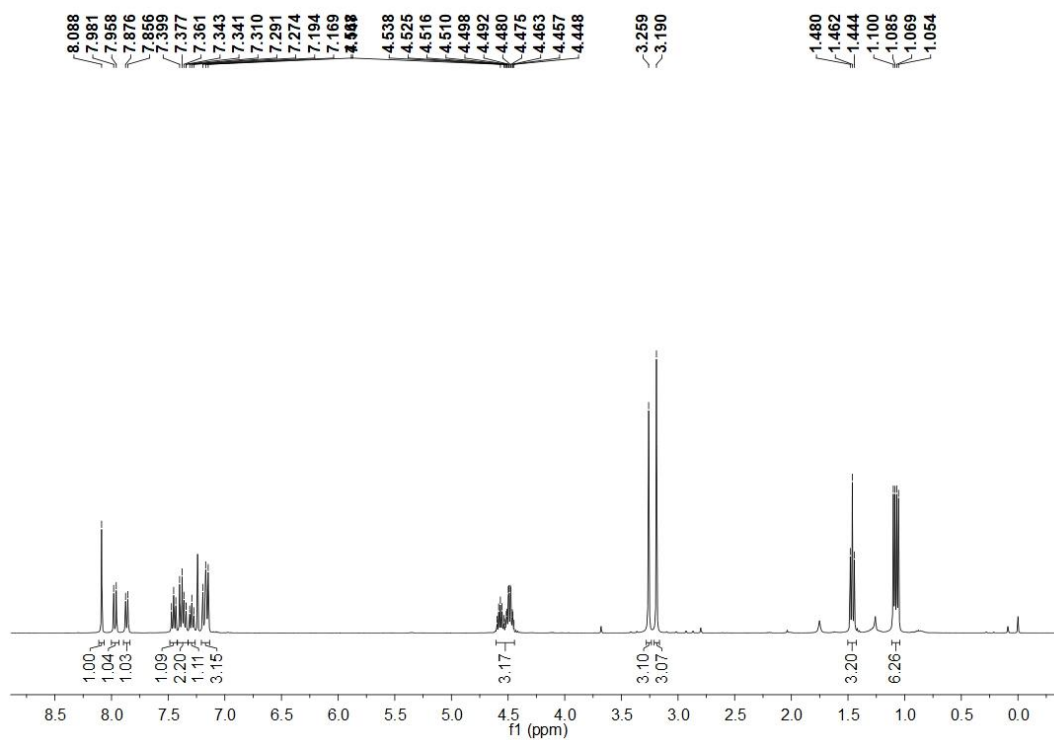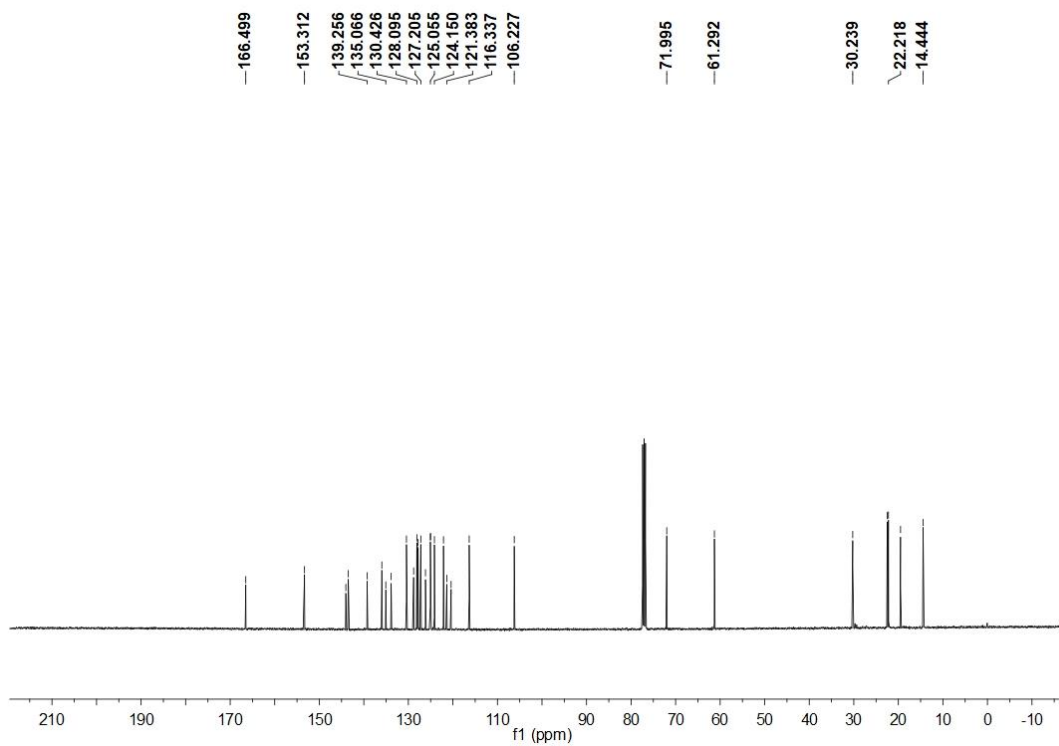

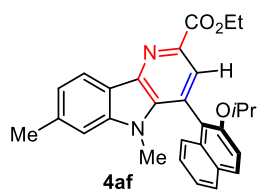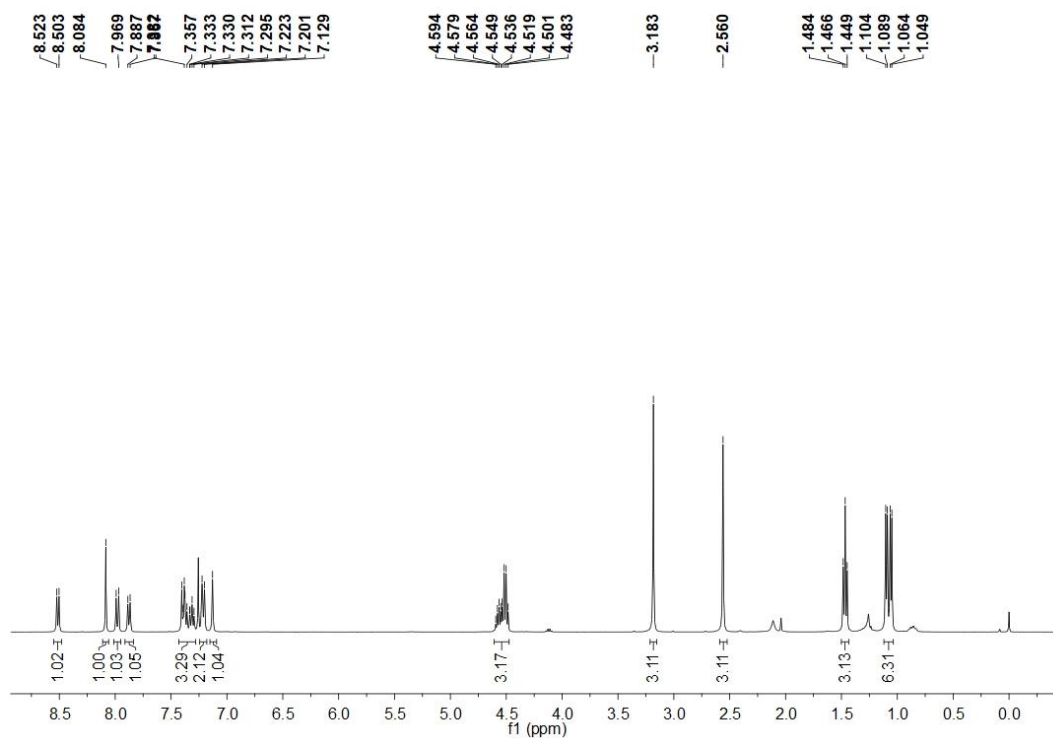

**<sup>1</sup>H NMR (400 MHz, Chloroform-d)**

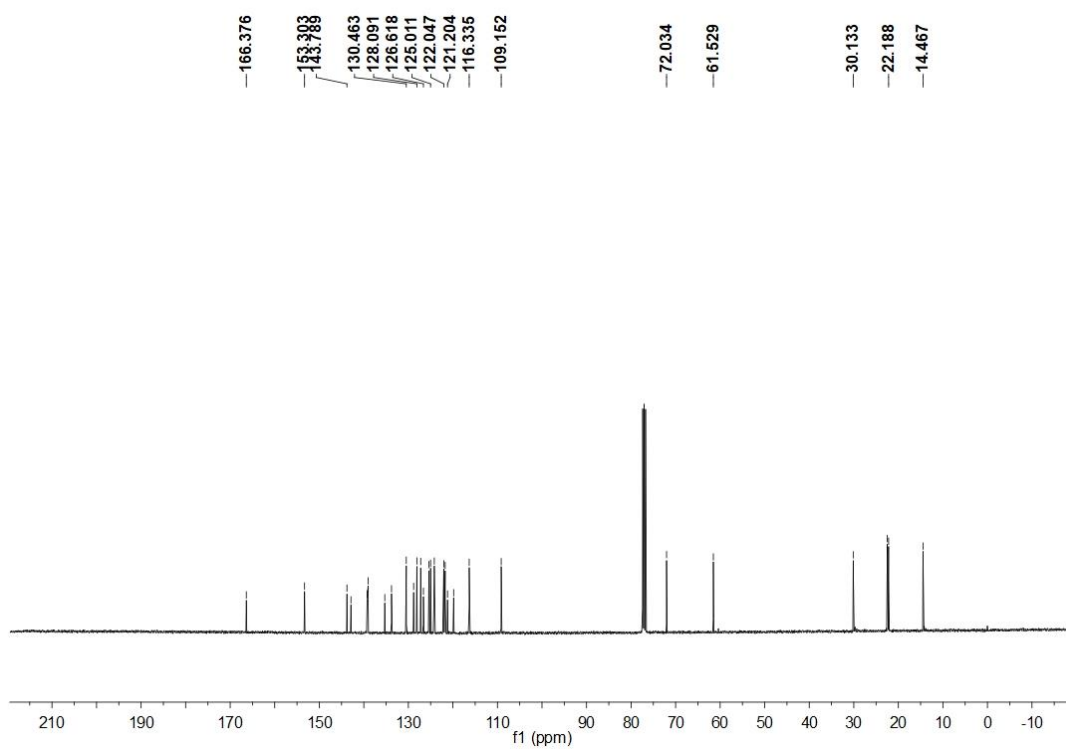

**<sup>13</sup>C NMR (101 MHz, Chloroform-d)**

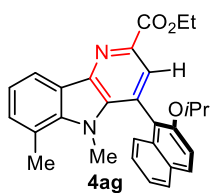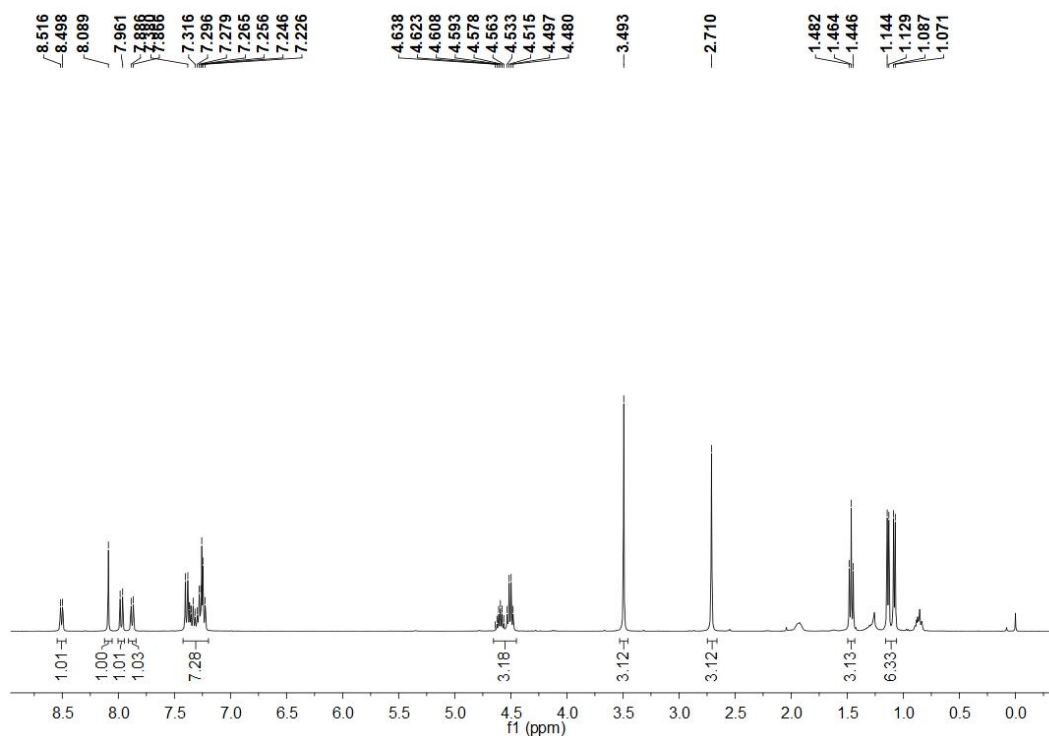

**<sup>1</sup>H NMR (400 MHz, Chloroform-d)**

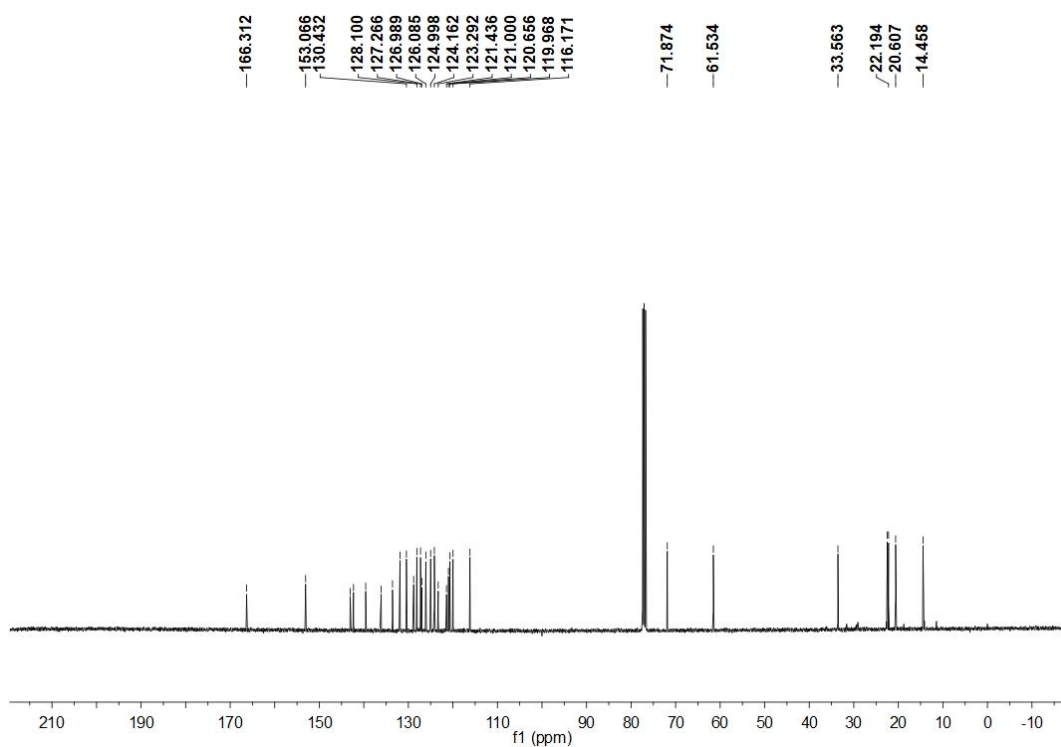

**<sup>13</sup>C NMR (101 MHz, Chloroform-d)**

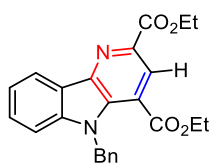

4ai

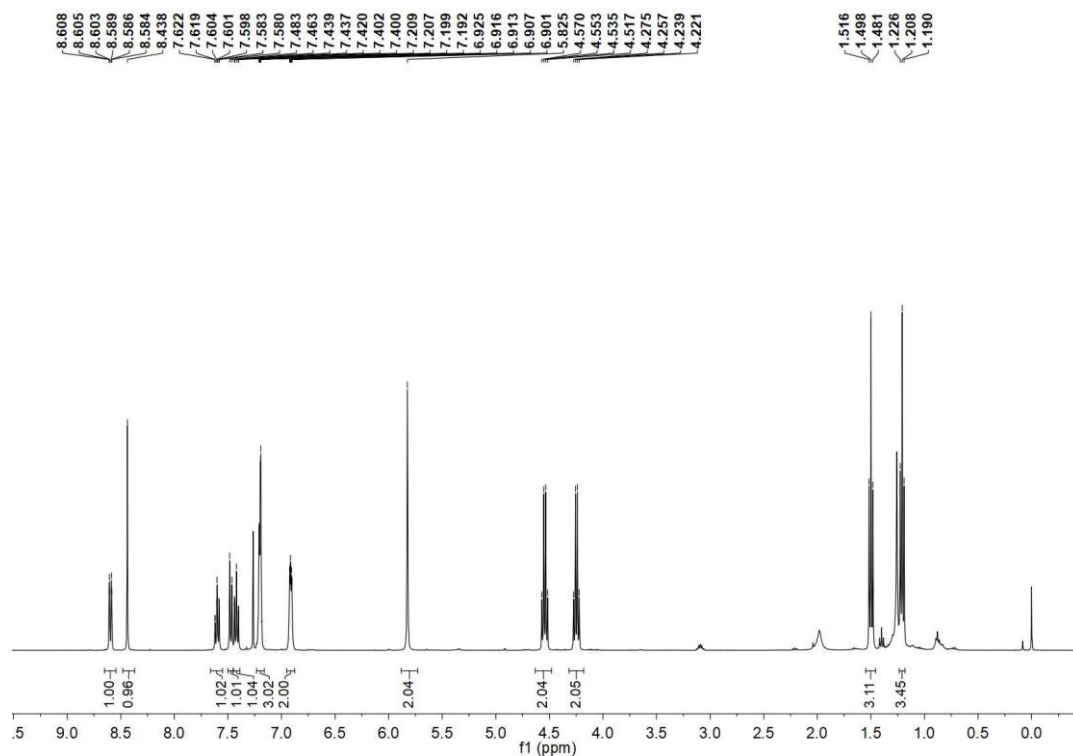

<sup>1</sup>H NMR (400 MHz, Chloroform-d)

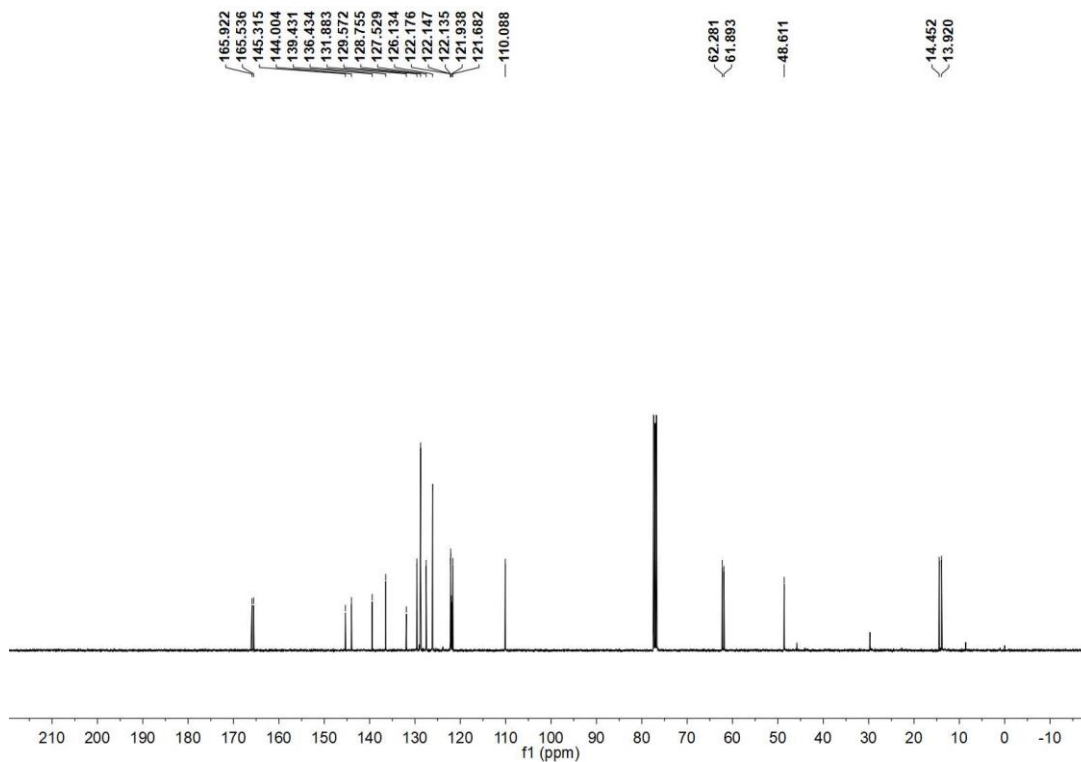

<sup>13</sup>C NMR (101 MHz, Chloroform-d)

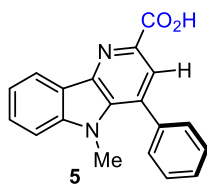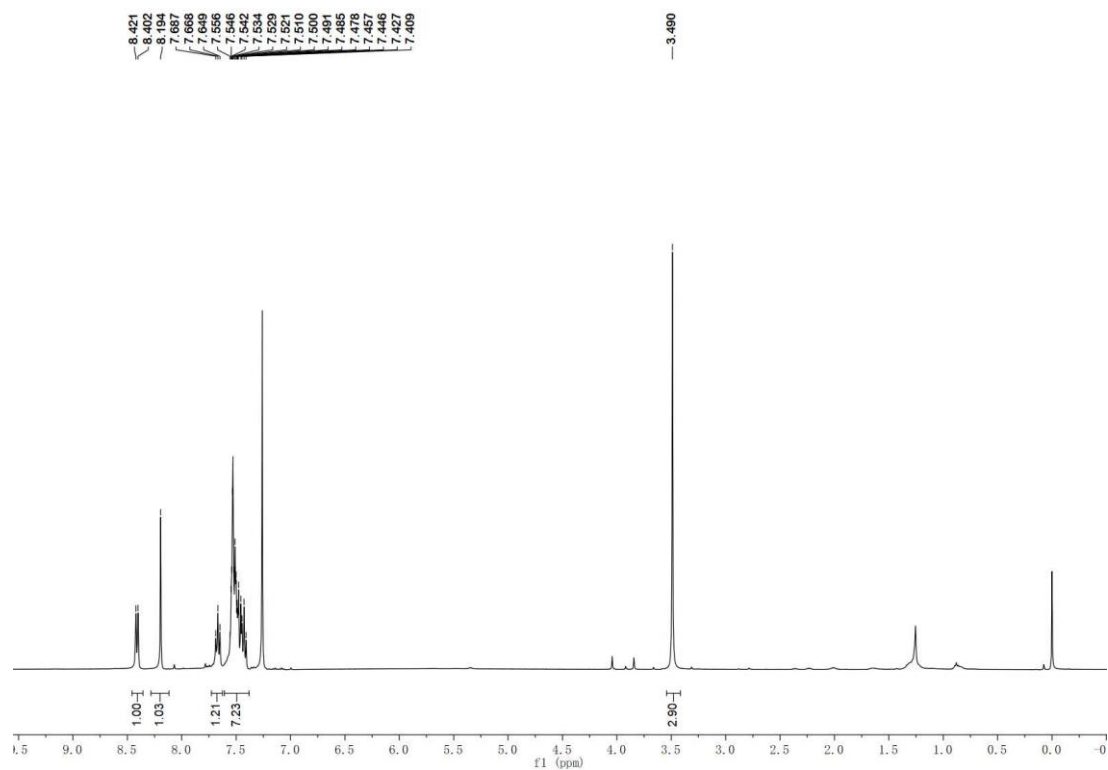

<sup>1</sup>H NMR (400 MHz, Chloroform-d)

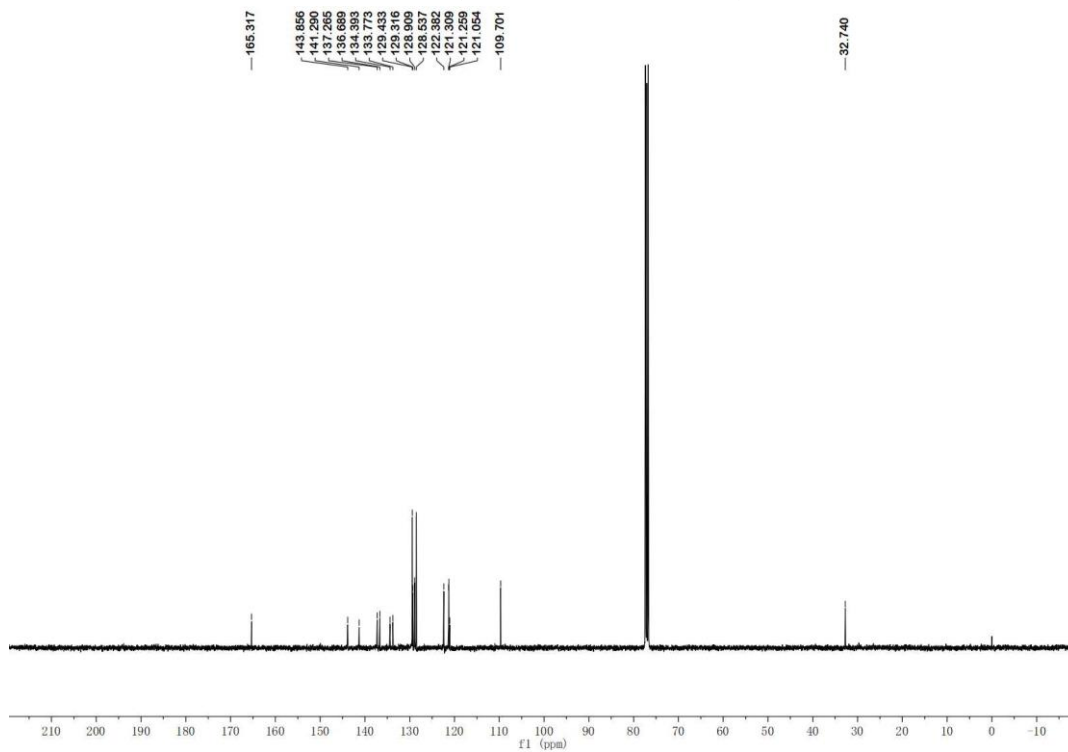

<sup>13</sup>C NMR (101 MHz, Chloroform-d)

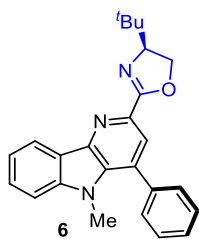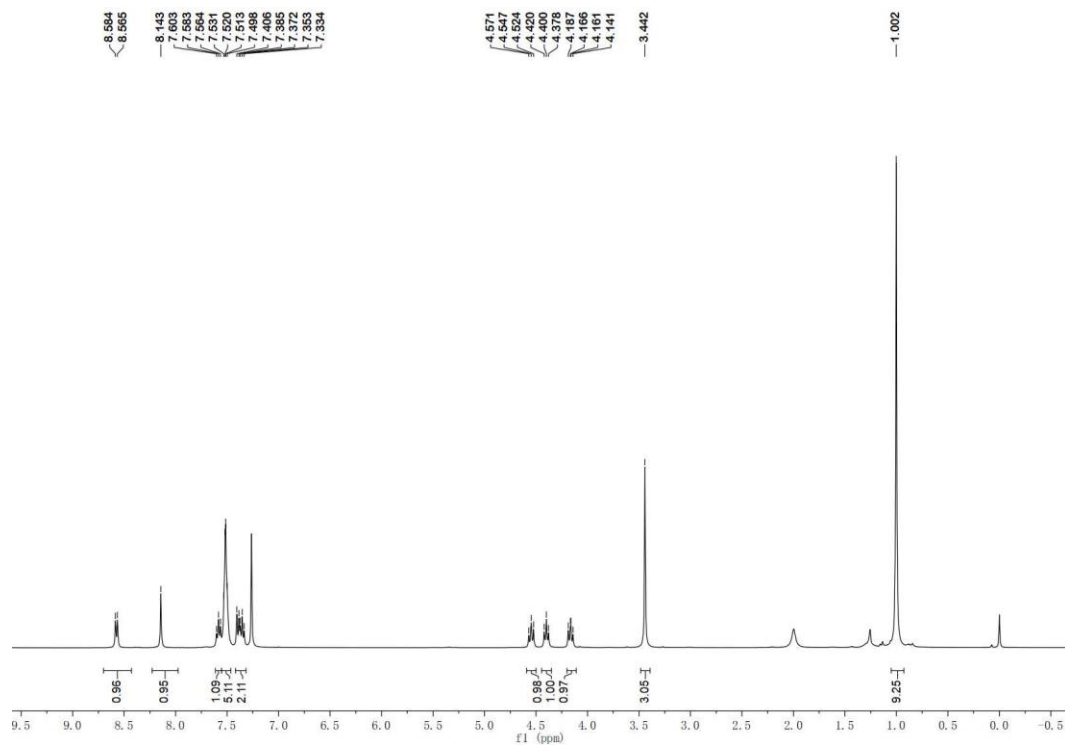

**<sup>1</sup>H NMR (400 MHz, Chloroform-d)**

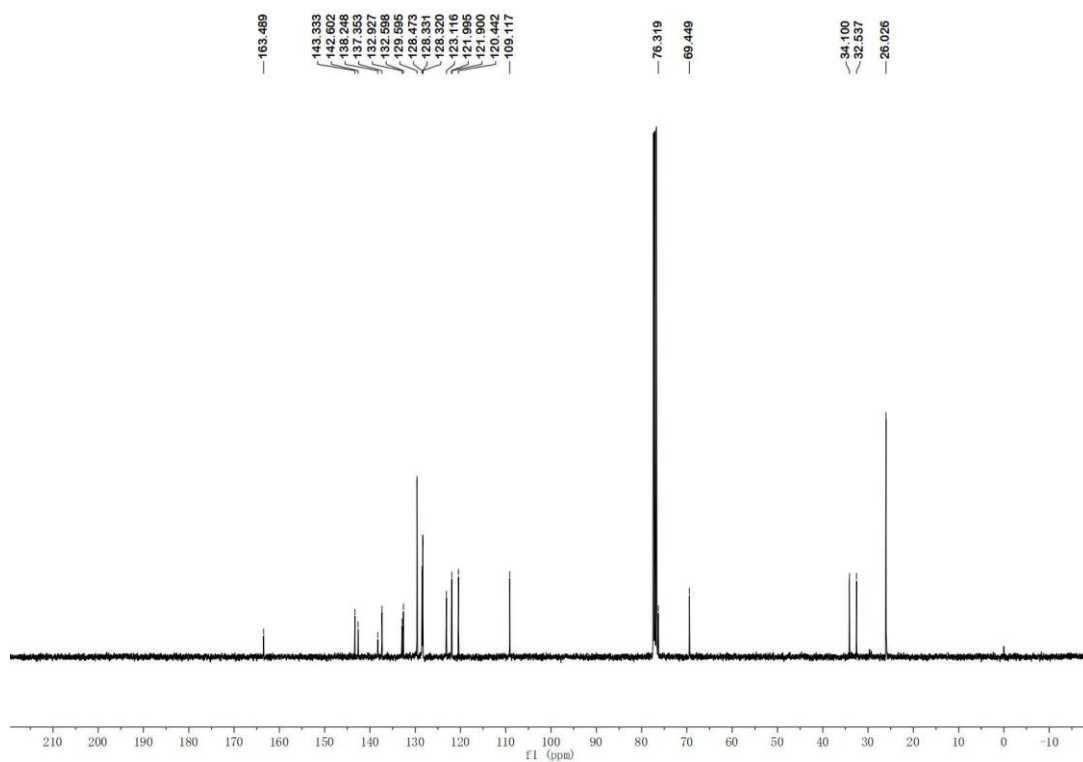

**<sup>13</sup>C NMR (101 MHz, Chloroform-d)**



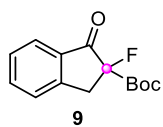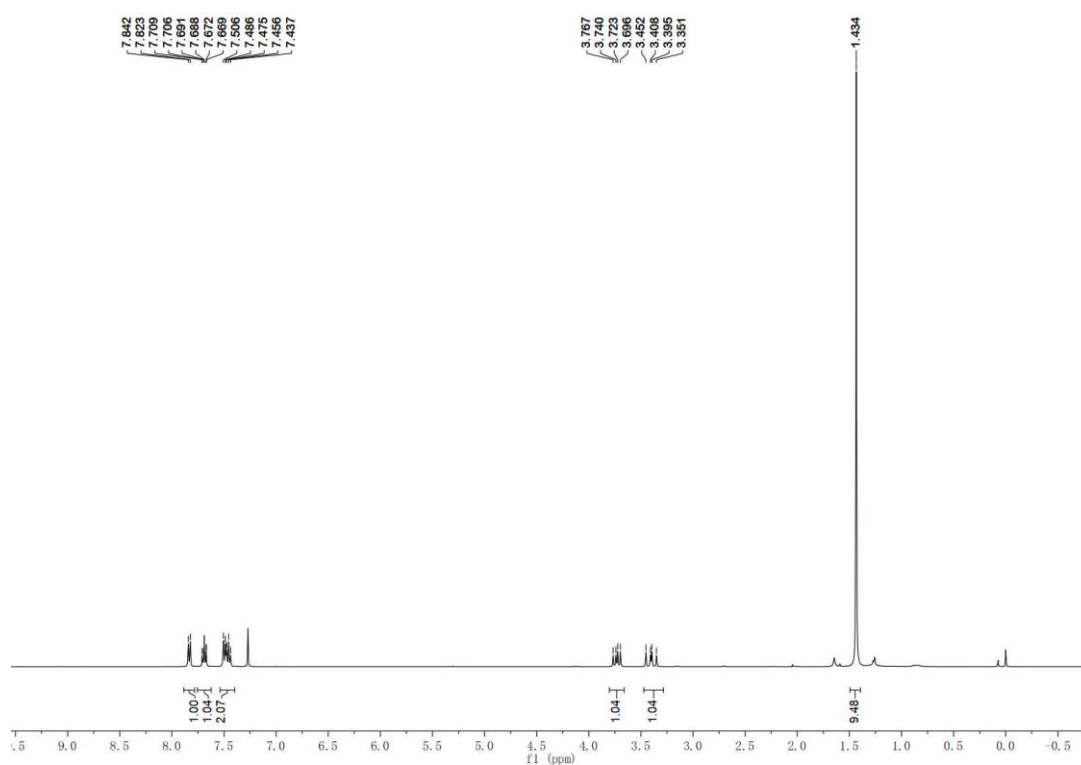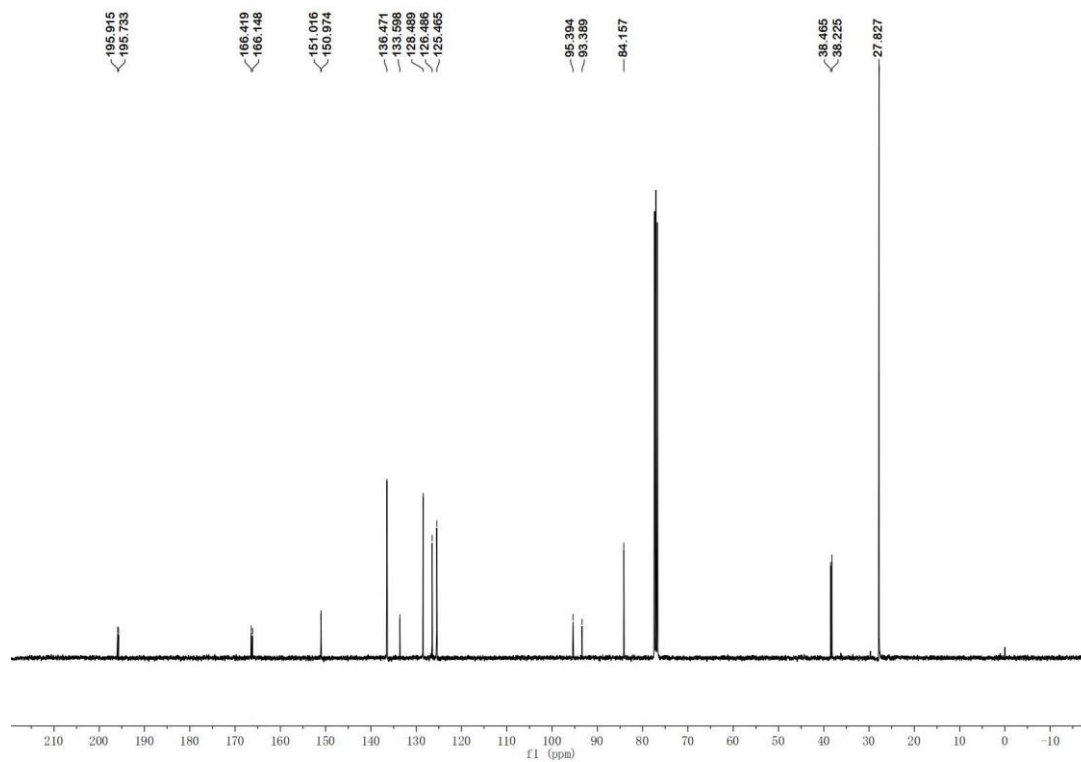

**<sup>13</sup>C NMR (101 MHz, Chloroform-d)**

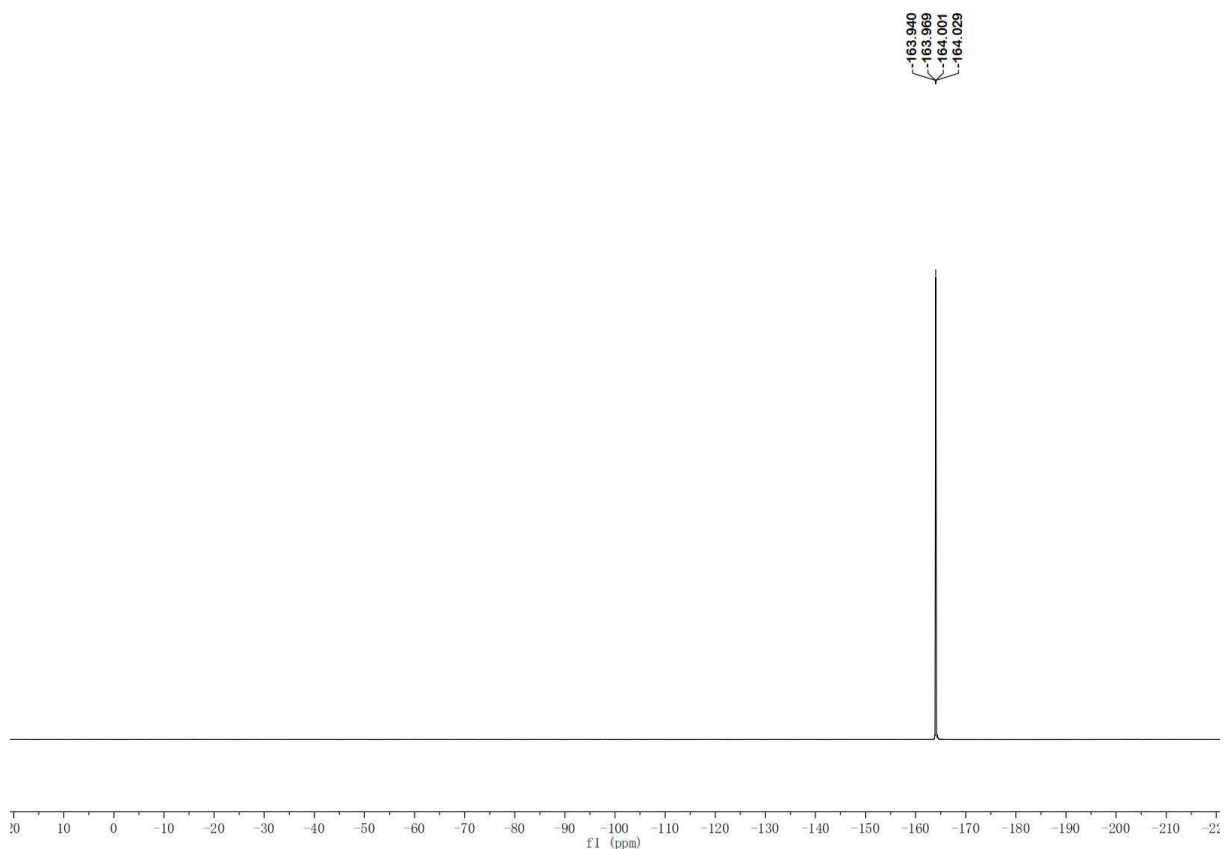

<sup>19</sup>F NMR (376 MHz, Chloroform-d)

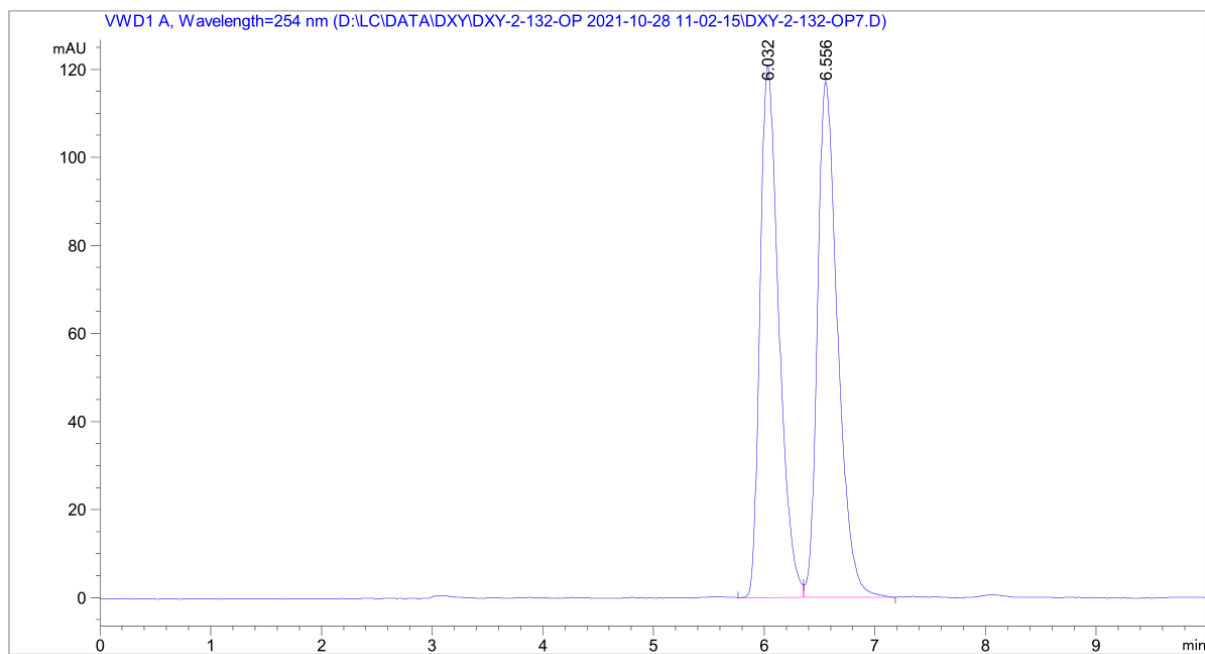

| Peak # | RetTime [min] | Type | Width [min] | Area [mAU*s] | Height [mAU] | Area %  |
|--------|---------------|------|-------------|--------------|--------------|---------|
| 1      | 6.032         | BV   | 0.1805      | 1430.65918   | 120.71239    | 49.0712 |
| 2      | 6.556         | VB   | 0.1915      | 1484.81628   | 117.20554    | 50.9288 |

HPLC chromatogram of compound (*rac*)-9

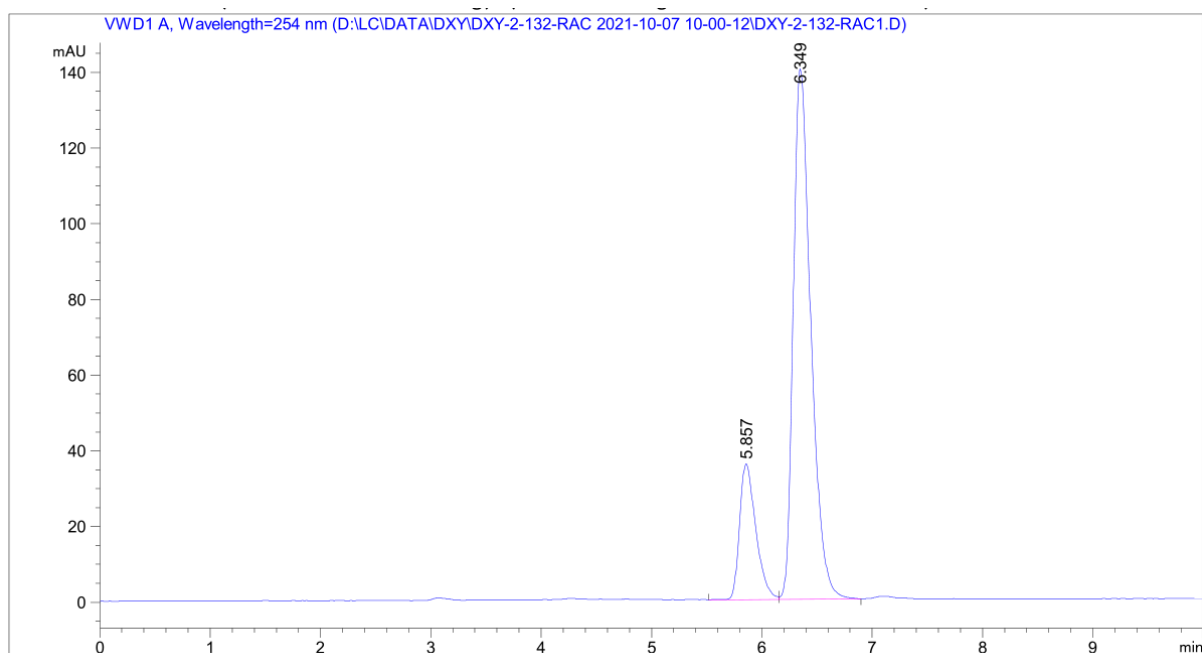

| Peak # | RetTime [min] | Type | Width [min] | Area [mAU*s] | Height [mAU] | Area %  |
|--------|---------------|------|-------------|--------------|--------------|---------|
| 1      | 5.857         | BV   | 0.1560      | 367.71194    | 35.86565     | 19.1706 |
| 2      | 6.349         | VB   | 0.1684      | 1550.39331   | 140.08653    | 80.8294 |

**HPLC chromatogram of chiral compound 9 (ligand 6 was used)**

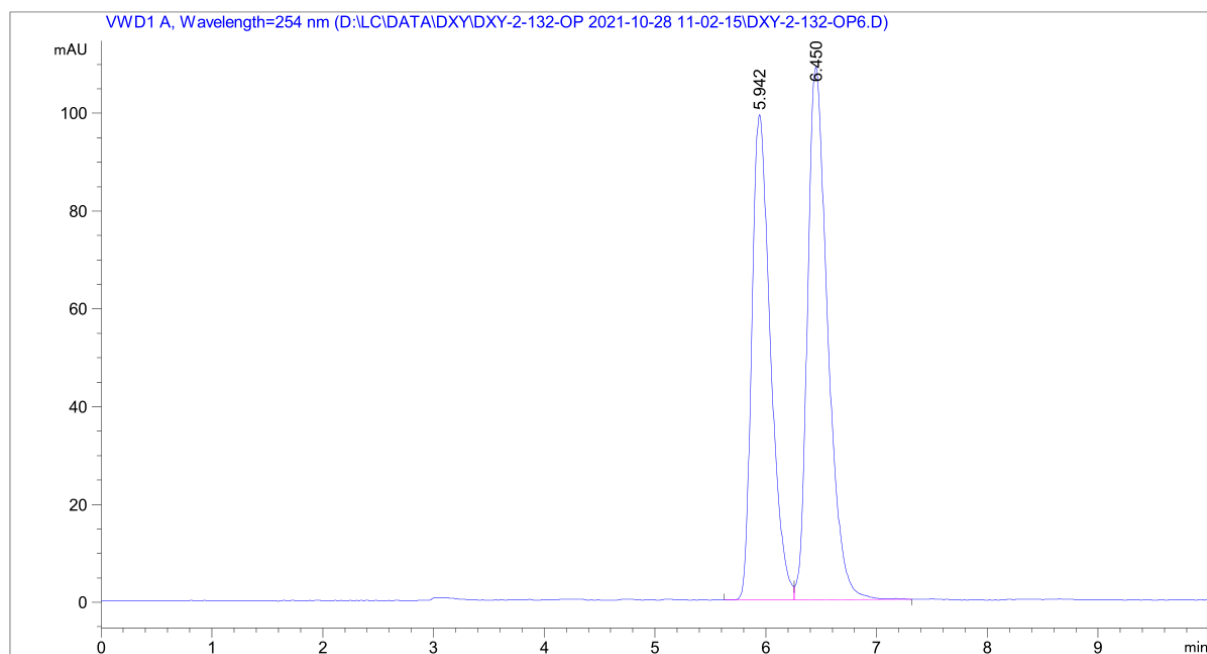

| Peak # | RetTime [min] | Type | Width [min] | Area [mAU*s] | Height [mAU] | Area %  |
|--------|---------------|------|-------------|--------------|--------------|---------|
| 1      | 5.942         | BV   | 0.1786      | 1160.30664   | 99.24376     | 45.6307 |
| 2      | 6.450         | VV R | 0.1918      | 1382.51416   | 108.87755    | 54.3693 |

**HPLC chromatogram of chiral compound 9 (Bu-Pyrbox was used)**
